# Supplementary material
Source: publisher figshare collection journal article supplement (https://tandf.figshare.com/articles/dataset/_/8068571)
Supplement: Supplementary file 1 [file 2]

Supplemental table 2: Glaucoma loci and associated genes

| Loci      | Gene                | Polymorphism         | Trait           | Population        | Studie   | Size (n)                          | Year | Reference                     |
|-----------|---------------------|----------------------|-----------------|-------------------|----------|-----------------------------------|------|-------------------------------|
| 1q24.3    | GLC1A locus<br>MYOC | D1S194 - D1S191      | POAG            | US                | Linkage  | 1 family POAG: 22, C: 15          | 1993 | Sheffield <sup>1</sup>        |
|           |                     | rs121909193          | POAG            | US                | C-C      | POAG: 330, C: 471                 | 1997 | Stone <sup>2</sup>            |
|           |                     | rs74315328           | POAG            |                   |          |                                   |      |                               |
|           |                     | rs74315329           | POAG            |                   |          |                                   |      |                               |
|           |                     | 21 mutations         | POAG            | Cau, Asian        | Cases    | POAG: 1703                        | 1999 | Fingert <sup>3</sup>          |
| 2cen-q13  | GLC1B locus         | SNP third exon (85%) | POAG            | Cau, Asian        | Database | Not applicable                    | 2008 | Hewitt <sup>4</sup>           |
|           |                     | D2S2161 - D2S2264    | POAG            | UK                | Linkage  | POAG: 6 families                  | 1996 | Stoilova <sup>5</sup>         |
|           |                     | D2S1897 - D2S2269    | POAG            | Australia         | Linkage  | 1 family POAG: 7, C: 8            | 2006 | Charlesworth <sup>6</sup>     |
|           |                     | 8 DS markers         | -               | US                | Linkage  | 18 families POAG: 46, C:31        | 1998 | Allingham <sup>7</sup>        |
|           |                     | D3S3637 - D3S1744    | POAG            | US                | Linkage  | 1 family POAG: 12, C: 32          | 1997 | Wirtz <sup>8</sup>            |
| 3q21-q24  | GLC1C locus         | D3S3637 - D3S3694    | POAG            | US, Greece        | Linkage  | 2 families POAG: 22, C: 72        | 2004 | Samples <sup>9</sup>          |
|           |                     | rs367923973          | POAG            | US                | Linkage  | 1 family POAG: 12, C: 32          | 2014 | Keller <sup>10</sup>          |
| 8q23      | IL20RB              | D8S1830 - D8S592     | POAG            | US                | Linkage  | 1 family POAG: 8, C:12            | 1998 | Trifan <sup>11</sup>          |
| 10p14-p15 | GLC1E locus<br>OPTN | D10S1729 - D10S1664  | NTG             | UK                | Linkage  | 1 family NTG: 16, C: 23           | 1998 | Sarfarazi <sup>12</sup>       |
|           |                     | rs28939688           | NTG             | Cau               | Linkage  | POAG: 54 families                 | 2002 | Rezaie <sup>13</sup>          |
|           |                     | rs11258194           | NTG, POAG       |                   |          |                                   |      |                               |
|           |                     | rs28939688           | NTG             | Cau, Asian        | C-C      | POAG: 1048, C: 251                | 2003 | Alward <sup>14</sup>          |
|           |                     | rs11258194           | NTG             | UK                | C-C      | HTG: 183, NTG: 132, C: 95         | 2003 | Aung <sup>15</sup>            |
|           |                     | rs11258194           | IOP             | France, Morocco   | C-C      | POAG: 293, C: 170                 | 2003 | Melki <sup>16</sup>           |
|           |                     | rs11258194           | POAG            | India             | Cases    | HTG: 170, NTG: 50                 | 2006 | Sripriya <sup>17</sup>        |
|           |                     | D7S2442 - D7S483     | POAG            | US                | Linkage  | POAG: 12, C: 13                   | 1999 | Wirtz <sup>18</sup>           |
|           |                     | D7S1277i             | NTG             | Japan             | C-C      | NTG: 141, C: 101                  | 2010 | Murakami <sup>19</sup>        |
|           |                     | ASB10                | exon 3 deletion | US                | Linkage  | POAG: 4, C: 1, Unr. C: 1          | 2012 | Pasutto <sup>20</sup>         |
| 7q35-q36  | GLC1F locus         | 26 polymorphisms     | POAG            | US, Germany       | C-C      | POAG: 1172, C: 461                | 2012 | Pasutto <sup>20</sup>         |
|           |                     | 24 polymorphisms     | POAG            | Pakistan          | C-C      | POAG: 30 (family), 208, C: 151    | 2015 | Micheal <sup>21</sup>         |
|           |                     | nonsynonymous        | -               | US                | C-C      | POAG: 158, C: 82                  | 2012 | Fingert <sup>22</sup>         |
|           |                     | rs118204022          | POAG            | US                | Linkage  | POAG: 130 families, Unr. C: 676   | 2005 | Monemi <sup>23</sup>          |
|           |                     | rs35703638           | POAG            |                   |          |                                   |      |                               |
|           |                     | rs116529882          | POAG            |                   |          |                                   |      |                               |
|           |                     | rs34595252           | POAG            |                   |          |                                   |      |                               |
|           |                     | 11 mutations         | NTG             | Germany           | cases    | NTG: 112                          | 2007 | Weisschuh <sup>24</sup>       |
|           |                     | 8 mutations          | POAG            | Germany           | C-C      | POAG: 399, C: 376                 | 2008 | Pasutto <sup>25</sup>         |
|           |                     | 16 mutations         | HTG             | China             | C-C      | HTG: 82, NTG: 42, C: 77           | 2009 | Fan <sup>26</sup>             |
| 5q22.1    | WDR36               | D5S2027              | IOP             | Mongolia          | Linkage  | C:1451 of 142 families            | 2010 | Lee <sup>27</sup>             |
|           |                     | rs10038177           | HTG             | India             | C-C      | HTG: 116, NTG: 207, C: 303        | 2011 | Mookherjee <sup>28</sup>      |
|           |                     | 6 mutations          | POAG            | Italy             | Linkage  | POAG: 34 families                 | 2011 | Frezzotti <sup>29</sup>       |
|           |                     | Haplotype H2         | POAG            | Spain             | C-C      | POAG: 479, C: 380                 | 2011 | Blanco-Marchite <sup>30</sup> |
|           |                     | 26 variations        | POAG            | Taiwan            | C-C      | POAG: 61 C: 61                    | 2017 | Su <sup>31</sup>              |
|           |                     | D2S2352 - D2S2165    | POAG            | UK                | Linkage  | 7 families POAG: 35, C: 32, U: 18 | 2007 | Suriyapperuma <sup>32</sup>   |
|           |                     | EFEMP1               | rs756065296     | AA                | Linkage  | 1 family POAG: 5, C: 3            | 2015 | Mackay <sup>33</sup>          |
| 15q11-q13 | GLC1I               | Centromere - D15S822 | POAG            | Cau, AA, Hispanic | Linkage  | 81 families POAG: 227, C: 143     | 2005 | Allingham <sup>34</sup>       |
|           |                     | Centromere - D15S822 | POAG            | Cau               | Linkage  | 25 families POAG: 107, C: 60      | 2006 | Woodroffe <sup>35</sup>       |

Supplemental table 2: Continued

| Loci                   | Gene                   | Polymorphism           | Trait | Population   | Study   | Size (n)                     | Year | Reference                   |
|------------------------|------------------------|------------------------|-------|--------------|---------|------------------------------|------|-----------------------------|
| 9q22                   | GLC1J locus<br>COL15A1 | D9S1841 - D9S271       | POAG  | US           | Linkage | 25 families POAG: 105, C: 93 | 2004 | Wiggs <sup>36</sup>         |
|                        |                        | rs2075662              | POAG  | Cau, AA      | Linkage | 15 families                  | 2013 | Wiggs <sup>37</sup>         |
|                        |                        | rs2075662              | POAG  | Cau, AA      | Cases   | 401                          | 2013 | Wiggs <sup>37</sup>         |
|                        |                        | rs61999303             | POAG  | Cau, AA      | Linkage | 15 families                  | 2013 | Wiggs <sup>37</sup>         |
|                        |                        | rs10519                | POAG  |              |         |                              |      |                             |
| 20p12                  | GLC1K locus            | D20S846 - D20S891      | POAG  | US           | Linkage | 25 families POAG: 105, C: 93 | 2004 | Wiggs <sup>36</sup>         |
|                        |                        | D20S848 - rs6081603    | POAG  | US           | Linkage | 4 families POAG: 19, C: 25   | 2008 | Sud <sup>38</sup>           |
| 3p21-p22               | GLC1L locus            | D3S1298 - D3S1289      | POAG  | Australia    | Linkage | 1 family POAG:24, C: 119     | 2005 | Baird <sup>39</sup>         |
| 5q22.1-q32             | GLC1M locus            | D5S2051 - D5S2090      | POAG  | China        | Linkage | 1 family POAG: 9, C: 18      | 2006 | Pang <sup>40</sup>          |
| 15q22-q24              | GLC1N locus            | D15S1036 - rs922693    | POAG  | China        | Linkage | 1 family POAG: 8, C: 17      | 2006 | Wang <sup>41</sup>          |
| 12q14                  | GLC1P locus<br>TBK1    | D12S1700               | CODA  | US           | Linkage | CODA: 17                     | 2007 | Fingert <sup>42</sup>       |
|                        |                        | Duplication            | NTG   | AA           | Linkage | NTG: 12                      | 2011 | Fingert <sup>43</sup>       |
|                        |                        | Duplication            | NTG   | US           | C-C     | HTG: 326, NTG: 152, C: 100   | 2011 | Fingert <sup>43</sup>       |
|                        |                        | Duplication            | NTG   | Japan, US    | C-C     | NTG: 309, C: 202             | 2012 | Kawase <sup>44</sup>        |
|                        |                        | Duplication            | NTG   | UK, US       | C-C     | NTG: 341, C: 414             | 2014 | Ritch <sup>45</sup>         |
|                        |                        | Duplication            | NTG   | Australia    | C-C     | HTG: 1045, NTG: 334, C: 254  | 2015 | Awedalla <sup>46</sup>      |
|                        |                        | rs13104825 - rs1425963 | POAG  | UK           | Linkage | 1 family POAG: 10, C: 1      | 2011 | Porter <sup>47</sup>        |
|                        |                        | D2S2186 - D2S1346      | PCG   | US           | Linkage | PCG: 5 families              | 1997 | Stoilov <sup>48</sup>       |
|                        |                        | 7 mutations            | POAG  | France       | C-C     | POAG: 236, C: 47             | 2004 | Melki <sup>49</sup>         |
|                        |                        | 6 mutations            | POAG  | India        | C-C     | POAG: 200, C: 100            | 2006 | Acharya <sup>50</sup>       |
| 4q35.1-q35.2<br>2p22.2 | GLC1Q locus<br>CYP1B1  | 6 mutations            | POAG  | India        | C-C     | POAG: 134, C: 200            | 2007 | Chakrabarti <sup>51</sup>   |
|                        |                        | 6 mutations            | POAG  | India        | C-C     | POAG: 264, C: 95             | 2008 | Bhattacharjee <sup>52</sup> |
|                        |                        | rs1056836              | POAG  | India        | C-C     | POAG: 264, C: 95             | 2008 | Bhattacharjee <sup>52</sup> |
|                        |                        | 2 mutations            | POAG  | India        | C-C     | HTG: 198, NTG: 53, C: 100    | 2007 | Kumar <sup>53</sup>         |
|                        |                        | 7 mutations            | POAG  | Spain        | C-C     | POAG: 82, C: 93              | 2006 | Lopez-Garrido <sup>54</sup> |
|                        |                        | 7 mutations            | POAG  | Germany      | C-C     | HTG: 270, NTG: 82, C: 376    | 2010 | Pasutto <sup>55</sup>       |
|                        |                        | multiple mutations     | POAG  | New Zealand  | cases   | Glaucoma: 150                | 2012 | Patel <sup>56</sup>         |
|                        |                        | rs180040               | POAG  | Cau, Asian   | Meta    | POAG: 2554, C: 4334          | 2015 | Wang <sup>57</sup>          |
|                        |                        | 8 mutations            | POAG  | Pakistan     | C-C     | POAG: 190, C: 40             | 2015 | Micheal <sup>58</sup>       |
|                        |                        | any mutation           | -     | Germany      | C-C     | NTG: 285, C: 282             | 2009 | Wolf <sup>59</sup>          |
|                        |                        | any mutation           | -     | China        | C-C     | HTG: 255, NTG: 100, C: 201   | 2010 | Fan <sup>60</sup>           |
|                        |                        | any mutation           | -     | Cau, Asian   | Meta    | POAG: 2292, C: 1717          | 2012 | Dong <sup>61</sup>          |
|                        |                        | any mutation           | -     | Saudi-Arabia | C-C     | POAG: 50, C:50               | 2018 | Abu-Amero <sup>62</sup>     |
| 6q22.31                | GJA1                   | c.791_792delAA         | POAG  | China        | Linkage | 1 family POAG:7 C:7          | 2015 | Huang <sup>63</sup>         |
| 1q41                   | TP53BP2                | c.109G > A             | POAG  | Netherlands  | Linkage | family POAG: 8, C: 1         | 2017 | Micheal <sup>64</sup>       |

Abbreviations: POAG= primary open-angle glaucoma; NTG= normal tension glaucoma; HTG= high tension glaucoma; IOP= intraocular pressure; CODA=cavitary optic disk anomalies; PCG=primary congenital glaucoma; UK= United Kingdom; Cau= Caucasian; US= United States; AA= African American; C-C= case control; Meta= meta-analysis; unr.= unrelated. (-) indicates that no significant association between the gene and any of the glaucoma traits was observed.

Supplemental table 3: Highly likely glaucoma risk genes

| Loci      | Gene           | Polymorphism | Trait         | Population                          | Study | Size (n)                                            | Year | Reference                  |
|-----------|----------------|--------------|---------------|-------------------------------------|-------|-----------------------------------------------------|------|----------------------------|
| 9q31.1    | ABCA1          | rs2472493    | IOP           | Asian, EU                           | Meta  | (D): 35296                                          | 2014 | Hysi <sup>65</sup>         |
|           |                | rs2472493    | POAG          | Cau                                 | Meta  | POAG: 4284, C: 95560                                | 2014 | Hysi <sup>65</sup>         |
|           |                | rs2472493    | POAG          | Australia, US                       | GWAS  | (D) POAG: 1155, C: 1992<br>(R) POAG: 3558, C: 9496  | 2014 | Gharahkhani <sup>66</sup>  |
|           |                | rs2472493    | POAG          | US, Australia, EU, Singapore, China | Meta  | (D) POAG: 3853, C: 33480<br>(R) POAG: 3164, C: 9242 | 2016 | Bailey <sup>67</sup>       |
|           |                | rs2472493    | IOP           | EU, Asia                            | GWAS  | (D): 69756 (R): 37930                               | 2017 | Choquet <sup>68</sup>      |
|           |                | rs2472493    | POAG, IOP     | Multi-ethnic                        | GWAS  | (D) POAG: 4986 C: 58426<br>(R) POAG: 7329 C: 169561 | 2018 | Choquet <sup>69</sup>      |
|           |                | rs2472493    | POAG          | Multi-ethnic                        | GWAS  | (D) POAG: 7329 C: 169561<br>(R) POAG: 4986 C: 58426 | 2018 | Choquet <sup>69</sup>      |
|           |                | rs2487032    | POAG          | China, Singapore                    | GWAS  | (D) POAG: 1007, C: 1009<br>(R) POAG: 1899, C: 4965  | 2014 | Chen <sup>70</sup>         |
|           |                | rs2164560    | POAG          |                                     |       |                                                     |      |                            |
|           |                | rs2472459    | POAG          |                                     |       |                                                     |      |                            |
|           |                | rs2472519    | POAG          |                                     |       |                                                     |      |                            |
|           |                | rs2487048    | IOP           | EU, Asian                           | Meta  | 37930                                               | 2017 | Springelkamp <sup>71</sup> |
|           |                | rs2487048    | POAG          | Cau, Asian                          | Meta  | POAG: 6429, C: 41404                                | 2017 |                            |
|           |                | rs2472496    | IOP, VCDR, CA | EU, Asian                           | Meta  | 37930                                               | 2017 |                            |
| 3q12.2    | ABI3BP         | rs9860250    | ODA           | EU, Asian                           | Meta  | (D) 17248 and 6841                                  | 2015 | Springelkamp <sup>72</sup> |
| 9q34.2    | ABO            | rs8176693    | IOP           | Asian, EU                           | Meta  | (D): 35296                                          | 2014 | Hysi <sup>65</sup>         |
|           |                | Bloodgroup B | POAG          | Pakistan                            | C-C   | POAG: 220, C: 2046                                  | 2009 | Khan <sup>73</sup>         |
|           |                | rs8176741    | IOP, VCDR, CA | EU, Asian                           | Meta  | 37930                                               | 2017 | Springelkamp <sup>71</sup> |
|           |                | rs8176672    | CA            |                                     |       |                                                     |      |                            |
| 5q12-q13  | ADAMTS6        | rs2307121    | CCT           | Cau, Asian                          | Meta  | 20000                                               | 2013 | Lu <sup>74</sup>           |
| 11q24.3   | ADAMTS8        | rs4936099    | VCDR          | Cau, Asian                          | Meta  | (D) 21094 and 6784                                  | 2014 | Springelkamp <sup>75</sup> |
|           |                | rs4936099    | VCDR, CA      | EU, Asian                           | Meta  | 37930                                               | 2017 | Springelkamp <sup>71</sup> |
|           |                | rs55796939   | IOP           |                                     |       |                                                     |      |                            |
|           |                | rs56009602   | CCT           | Europa                              | Meta  | 17803                                               | 2018 | Iglesias <sup>76</sup>     |
|           |                |              | CCT           | Asia                                | Meta  | 8107                                                | 2018 | Iglesias <sup>76</sup>     |
| 16q23.1   | ADAMTS18-NUDT7 | Rs75828804   | IOP           | EU, Asia                            | GWAS  | (D): 69756 (R): 37930                               | 2017 | Choquet <sup>68</sup>      |
| 4p16.1    | AFAP1          | rs4619890    | POAG          | Australia, US                       | GWAS  | (D) POAG: 1155, C: 1992<br>(R) POAG: 3558, C: 9496  | 2014 | Gharahkhani <sup>66</sup>  |
|           |                | rs4478172    | POAG          |                                     |       |                                                     |      |                            |
|           |                | rs11732100   | POAG          | US, Australia, EU, Singapore, China | Meta  | (D) POAG: 3853, C: 33480<br>(R) POAG: 3164, C: 9242 | 2016 | Bailey <sup>67</sup>       |
|           |                | rs28795989   | IOP           | EU, Asia                            | GWAS  | (D): 69756 (R): 37930                               | 2017 | Croquet <sup>68</sup>      |
|           |                | rs59521811   | POAG, IOP     | Multi-ethnic                        | GWAS  | (D) POAG: 4986 C: 58426<br>(R) POAG: 7329 C: 169561 | 2018 | Choquet <sup>69</sup>      |
|           |                | rs9330348    | POAG          | Multi-ethnic                        | GWAS  | (D) POAG: 7329 C: 169561<br>(R) POAG: 4986 C: 58426 | 2018 | Choquet <sup>69</sup>      |
|           |                |              |               |                                     |       |                                                     |      |                            |
|           |                |              |               |                                     |       |                                                     |      |                            |
| 15q24-q25 | AKAP13         | rs6496932    | CCT           | Croatia, Scotland                   | GWAS  | (D): 1445, (R): 824                                 | 2010 | Vitart <sup>77</sup>       |
|           |                | rs6496932    | CCT           | Singapore                           | GWAS  | (D): 5080                                           | 2011 | Vithana <sup>78</sup>      |
|           |                | rs6496932    | CCT           | Asian                               | GWAS  | (D): 7711, (R): 2681                                | 2012 | Cornes <sup>79</sup>       |
|           |                | rs6496932    | CCT           | Cau, Asian                          | Meta  | 20000                                               | 2013 | Lu <sup>74</sup>           |
|           |                | rs6496932    | -             | US-Cau                              | GWAS  | (D): 1117, (D): 6470                                | 2012 | Ulmer <sup>80</sup>        |
|           |                |              |               |                                     |       |                                                     |      |                            |

Supplemental table 3 Continued

| Loci      | Gene             | Polymorphism      | Trait         | Population        | Study | Size (n)                   | Year | Reference                  |
|-----------|------------------|-------------------|---------------|-------------------|-------|----------------------------|------|----------------------------|
| 15q24-q25 | AKAP13           | rs1828481         | CCT           | Asian             | GWAS  | (D): 7711, (R): 2681       | 2012 | Cornes <sup>79</sup>       |
|           |                  | rs1828481         | -             | US-Cau            | GWAS  | (D): 1117, (D): 6470       | 2012 | Ulmer <sup>80</sup>        |
|           |                  | rs34896088        | CCT           | Europa            | Meta  | 17803                      | 2018 | Iglesias <sup>76</sup>     |
|           |                  | rs34896088        | CCT           | Asia              | Meta  | 8107                       | 2018 | Iglesias <sup>76</sup>     |
| 2p13.3    | ANTXR1           | rs6732795         | IOP           | EU, Asia          | GWAS  | (D): 69756 (R): 37930      | 2017 | Choquet <sup>68</sup>      |
| 19q13.2   | APOE             | rs429358          | NTG           | Japan             | C-C   | POAG: 310, C: 179          | 2005 | Mabuchi 2005 <sup>81</sup> |
|           |                  | rs429358          | NTG           | Japan             | C-C   | HTG: 294, NTG: 106, C: 281 | 2005 | Fan <sup>82</sup>          |
|           |                  | rs429358          | NTG           | China             | C-C   | HTG: 294, NTG: 106, C: 300 | 2006 | Lam <sup>83</sup>          |
|           |                  | rs429358          | NTG           | Arabic            | C-C   | POAG: 60, C: 130           | 2009 | Al-dabbagh <sup>84</sup>   |
|           |                  | rs429358          | NTG           | Australia         | C-C   | HTG: 72, NTG: 70, C: 51    | 2002 | Vickers <sup>85</sup>      |
|           |                  | rs429358          | -             | UK                | C-C   | POAG: 137, C: 75           | 2004 | Ressiniotis <sup>86</sup>  |
|           |                  | rs429358          | -             | Turkey            | C-C   | POAG: 75, C: 119           | 2009 | Saglar <sup>87</sup>       |
|           |                  | rs429358          | -             | Estonia           | C-C   | POAG: 242, C: 187          | 2007 | Zetterberg <sup>88</sup>   |
|           |                  | rs429358          | -             | UK                | C-C   | NTG: 155, C: 349           | 2004 | Lake <sup>89</sup>         |
|           |                  | rs7412            | POAG          | Japan             | C-C   | POAG: 310, C: 179          | 2005 | Mabuchi <sup>81</sup>      |
|           |                  | rs7412            | POAG          | Japan             | C-C   | HTG: 294, NTG: 106, C: 281 | 2005 | Fan <sup>82</sup>          |
|           |                  | rs7412            | POAG          | China             | C-C   | HTG: 294, NTG: 106, C: 300 | 2006 | Lam <sup>83</sup>          |
|           |                  | rs7412            | POAG          | Arabic            | C-C   | POAG: 60, C: 130           | 2009 | Al-dabbagh <sup>84</sup>   |
|           |                  | rs7412            | POAG          | Australia         | C-C   | HTG: 72, NTG: 70, C: 51    | 2002 | Vickers <sup>85</sup>      |
|           |                  | rs7412            | POAG          | Poland            | C-C   | POAG: 183, C: 209          | 2015 | Nowak <sup>90</sup>        |
|           |                  | rs7412            | POAG          | Greece            | C-C   | POAG: 53, C: 107           | 2013 | Chiras <sup>91</sup>       |
|           |                  | rs7412            | -             | UK                | C-C   | POAG: 137, C: 75           | 2004 | Ressiniotis <sup>86</sup>  |
|           |                  | rs7412            | -             | Turkey            | C-C   | POAG: 75, C: 119           | 2009 | Saglar <sup>87</sup>       |
|           |                  | rs7412            | -             | Estonia           | C-C   | POAG: 242, C: 187          | 2007 | Zetterberg <sup>88</sup>   |
|           |                  | rs7412            | -             | UK                | C-C   | NTG: 155, C: 349           | 2004 | Lake <sup>89</sup>         |
|           |                  | rs429358 + rs7412 | POAG          | Cau, Asian        | Meta  | POAG: 1971, C: 1756        | 2014 | Liao <sup>92</sup>         |
| 11q23.1   | ARHGAP20/POU2AF1 | rs4938174         | CCT           | Cau, Asian        | Meta  | 20000                      | 2013 | Lu <sup>74</sup>           |
| 11q23.3   | ARHGEF12         | rs58073046        | IOP           | NL, Australia     | GWAS  | (D): 8105, (R): 7471       | 2015 | Springelkamp <sup>93</sup> |
|           |                  | rs58073046        | POAG, NTG     | NL, Australia, NZ | C-C   | POAG: 1225, C: 4117        | 2015 | Springelkamp <sup>93</sup> |
|           |                  | 11:120357425      | IOP           | EU, Asian         | Meta  | 37930                      | 2017 | Springelkamp <sup>71</sup> |
|           |                  | rs12794618        | IOP           |                   |       |                            |      |                            |
|           |                  | Rs199800298       | IOP           | EU, Asia          | GWAS  | (D): 69756 (R): 37930      | 2017 | Choquet <sup>68</sup>      |
| 10q21.2   | ARID5B           | rs7090871         | CCT           | Cau, Asian        | Meta  | 20000                      | 2013 | Lu <sup>74</sup>           |
|           |                  | rs35809595        | CCT           | Europa            | Meta  | 17803                      | 2018 | Iglesias <sup>76</sup>     |
|           |                  | rs35809595        | CCT           | Asia              | Meta  | 8107                       | 2018 | Iglesias <sup>76</sup>     |
|           |                  | rs5785510         | IOP           | EU, Asia          | GWAS  | (D): 69756 (R): 37930      | 2017 | Choquet <sup>68</sup>      |
| 2q37.1    | ARL4C            | rs13024279        | CCT           | Europa            | Meta  | 17803                      | 2018 | Iglesias <sup>76</sup>     |
|           |                  | rs13024279        | CCT           | Asia              | Meta  | 8107                       | 2018 | Iglesias <sup>76</sup>     |
| 15q26.3   | ASB7             | rs11247230        | CA, VCDR      | EU, Asian         | Meta  | (D) 17248 and 6841         | 2015 | Springelkamp <sup>72</sup> |
|           |                  | rs4299136         | VCDR, CA, ODA | EU, Asian         | Meta  | 37930                      | 2017 | Springelkamp <sup>71</sup> |
|           |                  | rs34222435        | CA            |                   |       |                            |      |                            |

Supplemental table 3: Continued

| Loci          | Gene      | Polymorphism | Trait         | Population                          | Study   | Size (n)                                         | Year | Reference                   |
|---------------|-----------|--------------|---------------|-------------------------------------|---------|--------------------------------------------------|------|-----------------------------|
| 15q26.3       | ASB7      | rs60779155   | ODA           | EU, Asian                           | Meta    | 37930                                            | 2017 | Springelkamp <sup>71</sup>  |
| 10q21.3-q22.1 | ATOH7     | rs1900004    | ODA           | NL                                  | Linkage | 23000                                            | 2011 | Axenovich <sup>94</sup>     |
|               |           | rs1900004    | ODA           | NL, UK                              | GWAS    | (D): 7360, (R): 4455                             | 2010 | Ramdas <sup>95</sup>        |
|               |           | rs1900004    | POAG          | Eu                                  | Meta    | POAG: 3161, C: 42837                             | 2011 | Ramdas <sup>96</sup>        |
|               |           | rs1900004    | NTG           | Japan                               | C-C     | HTG: 212, NTG: 213, C: 191                       | 2012 | Mabuchi <sup>97</sup>       |
|               |           | rs1900004    | VCDR, POAG    | US-Cau                              | C-C     | POAG: 539, C: 336                                | 2011 | Fan <sup>98</sup>           |
|               |           | rs1900004    | VCDR          | Cau, Asian                          | Meta    | (D) 21094 and 6784                               | 2014 | Springelkamp <sup>75</sup>  |
|               |           | rs1900004    | ODA           | EU, Asian                           | Meta    | (D) 17248 and 6841                               | 2015 | Springelkamp <sup>72</sup>  |
|               |           | rs1900004    | VCDR          | Latino                              | GWAS    | (D): 3596, (R): 941                              | 2017 | Nannini <sup>99</sup>       |
|               |           | rs1900005    | VCDR          |                                     |         |                                                  |      |                             |
|               |           | rs1900005    | VCDR          | EU, Asian                           | Meta    | 37930                                            | 2017 | Springelkamp <sup>71</sup>  |
|               |           | rs10998036   | CA            |                                     |         |                                                  |      |                             |
|               |           | rs7916410    | ODA           |                                     |         |                                                  |      |                             |
|               |           | rs3858145    | ODA           | Australia, UK                       | GWAS    | (D): 1368, (R): 848                              | 2010 | Macgregor <sup>100</sup>    |
|               |           | rs3858145    | CA            | EU, Asian                           | Meta    | (D) 17248 and 6841                               | 2015 | Springelkamp <sup>72</sup>  |
|               |           | rs7916697    | ODA           | Singapore, NL                       | GWAS    | (D): 4445, (R): 9236                             | 2011 | Khor <sup>101</sup>         |
|               |           | rs7916697    | ODA           | Australia, UK                       | PC      | 4224                                             | 2014 | Venturini <sup>102</sup>    |
|               |           | rs7916697    | VCDR          | Latino                              | GWAS    | (D): 3596, (R): 941                              | 2017 | Nannini <sup>99</sup>       |
|               |           | rs61854782   | VCDR          | China                               | C-C     | HTG: 117, NTG: 25, C: 289                        | 2012 | Chen <sup>103</sup>         |
|               |           | rs56238729   | VCDR          | Latino                              | GWAS    | (D): 3596, (R): 941                              | 2017 | Nannini <sup>99</sup>       |
| 12q24.12      | ATXN2     | rs7137828    | POAG          | US, Australia, EU, Singapore, China | Meta    | (D) POAG: 3853, C: 33480 (R) POAG: 3164, C: 9242 | 2016 | Bailey <sup>67</sup>        |
| 13q12.11      | AVGR8     | rs1034200    | CCT           | Croatia, Scotland                   | GWAS    | (D): 1445, (R): 824                              | 2010 | Vitart <sup>77</sup>        |
| 17q23         | BCAS3     | rs1034200    | CCT           | Cau, Asian                          | Meta    | 20000                                            | 2013 | Lu <sup>74</sup>            |
|               |           | rs8068952    | VCDR          | NL, UK                              | GWAS    | (D): 7360, (R): 4455                             | 2010 | Ramdas <sup>95</sup>        |
|               |           | rs11651885   | CA            | EU, Asian                           | Meta    | (D) 17248 and 6841                               | 2015 | Springelkamp <sup>72</sup>  |
|               |           | rs11867840   | CA            | EU, Asian                           | Meta    | 37930                                            | 2017 | Springelkamp <sup>71</sup>  |
| 20p12.3       | BMP2      | rs6054374    | VCDR          | Cau, Asian                          | Meta    | (D) 21094 and 6784                               | 2014 | Springelkamp <sup>75</sup>  |
|               |           | rs6054383    | CA, VCDR      | EU, Asian                           | Meta    | (D) 17248 and 6841                               | 2015 | Springelkamp <sup>72</sup>  |
|               |           | rs6107845    | VCDR          | EU, Asian                           | Meta    | 37930                                            | 2017 | Springelkamp <sup>71</sup>  |
|               |           | rs6054375    | CA            | EU, Asian                           | Meta    | 37930                                            | 2017 | Springelkamp <sup>71</sup>  |
| 14q22.1       | BMP4      | rs10130556   | CA, VCDR      | EU, Asian                           | Meta    | (D) 17248 and 6841                               | 2015 | Springelkamp <sup>72</sup>  |
| 7q11.21       | C7orf42   | rs4718428    | CCT           | Asian                               | GWAS    | (D): 7711, (R): 2681                             | 2012 | Cornes <sup>79</sup>        |
|               |           | rs4718428    | CCT           | Cau, Asian                          | Meta    | 20000                                            | 2013 | Lu <sup>74</sup>            |
| 22q13.1       | CARD10    | rs9607469    | ODA           | Singapore, NL                       | GWAS    | (D): 4445, (R): 9236                             | 2011 | Khor <sup>101</sup>         |
|               |           | rs9607469    | VCDR          | India                               | C-C     | POAG: 97, C: 371                                 | 2015 | Philomenadin <sup>104</sup> |
|               |           | rs9607469    | ODA           | EU, Asian                           | Meta    | (D) 17248 and 6841                               | 2015 | Springelkamp <sup>72</sup>  |
|               |           | rs5756813    | VCDR          | Cau, Asian                          | Meta    | (D) 21094 and 6784                               | 2014 | Springelkamp <sup>75</sup>  |
|               |           | rs5756813    | CA, VCDR      | EU, Asian                           | Meta    | (D) 17248 and 6841                               | 2015 | Springelkamp <sup>72</sup>  |
|               |           | rs2092172    | VCDR, CA, ODA | EU, Asian                           | Meta    | 37930                                            | 2017 | Springelkamp <sup>71</sup>  |
|               |           | rs56385951   | ODA           | EU, Asian                           | Meta    | 37930                                            | 2017 | Springelkamp <sup>71</sup>  |
| 7q31.1        | CAV1/CAV2 | rs4236601    | POAG          | Iceland, Cau, Asian                 | GWAS    | (D) POAG: 1263, C: 34877 (R) POAG: 2474, C: 2644 | 2010 | Thorleifsson <sup>105</sup> |

Supplemental table 3: Continued

| Loci    | Gene        | Polymorphism | Trait         | Population    | Study   | Size (n)                                            | Year | Reference                   |
|---------|-------------|--------------|---------------|---------------|---------|-----------------------------------------------------|------|-----------------------------|
| 7q31.1  | CAV1/CAV2   | rs4236601    | POAG          | US-Cau        | C-C     | HTG: 671, NTG: 329, C: 1183                         | 2011 | Wiggs <sup>106</sup>        |
|         |             | rs4236601    | POAG          | Spain         | C-C     | POAG: 391 C: 383                                    | 2017 | Zanon-Moreno <sup>107</sup> |
|         |             | rs4236601    | -             | Brazil        | C-C     | POAG: 310 C: 247                                    | 2018 | Nunes <sup>108</sup>        |
|         |             | rs4236601    | HTG           | China, Japan  | C-C     | POAG: 848, C:1574                                   | 2016 | Rong <sup>109</sup>         |
|         |             | rs7795356    | POAG          | Japan         | GWAS    | (D) POAG: 1394, C: 6599,<br>(R) POAG: 1802, C: 7212 | 2012 | Osman <sup>110</sup>        |
|         |             | rs4136601    | POAG          | US-Cau        | C-C     | HTG: 671, NTG: 329, C: 1183                         | 2011 | Wiggs <sup>106</sup>        |
|         |             | rs1052990    | POAG          |               |         |                                                     |      |                             |
|         |             | rs1052990    | HTG           | China, Japan  | C-C     | POAG: 848, C:1574                                   | 2016 | Rong <sup>109</sup>         |
|         |             | rs10258482   | IOP           | Asian, EU     | Meta    | (D): 35296                                          | 2014 | Hysi <sup>65</sup>          |
|         |             | rs10258482   | POAG          | Cau           | Meta    | POAG: 4284, C: 95560                                | 2014 | Hysi <sup>65</sup>          |
|         |             | rs10262524   | IOP           | Asian, EU     | Meta    | (D): 35296                                          | 2014 | Hysi <sup>65</sup>          |
|         |             | rs10262524   | POAG          | Cau           | Meta    | POAG: 4284, C: 95560                                | 2014 | Hysi <sup>65</sup>          |
|         |             | rs10281637   | IOP           | EU, Asian     | Meta    | 37930                                               | 2017 | Springelkamp <sup>71</sup>  |
|         |             | rs10281637   | POAG          | Cau, Asian    | Meta    | POAG: 6429, C: 41404                                | 2017 | Springelkamp <sup>71</sup>  |
|         |             | rs6969706    | POAG          | Multi-ethnic  | GWAS    | (D) POAG: 7329 C: 169561                            | 2018 | Choquet <sup>69</sup>       |
| 1q42.13 | CDC42BPA    | rs6671926    | ODA, CA, VCDR | EU, Asian     | Meta    | (D) 17248 and 6841                                  | 2015 | Springelkamp <sup>75</sup>  |
|         |             | 1:227562773  | CA            | EU, Asian     | Meta    | 37930                                               | 2017 | Springelkamp <sup>71</sup>  |
|         |             | rs11811982   | ODA           | EU, Asian     | Meta    | 37930                                               | 2017 | Springelkamp <sup>71</sup>  |
| 1p22    | CDC7/TGFBR3 | rs1192415    | ODA           | NL            | Linkage | 23000                                               | 2011 | Axenovich <sup>94</sup>     |
|         |             | rs1192415    | ODA           | NL, UK        | GWAS    | (D): 7360, (R): 4455                                | 2010 | Ramdas <sup>95</sup>        |
|         |             | rs1192415    | ODA           | Singapore, NL | GWAS    | (D): 4445, (R): 9236                                | 2011 | Khor <sup>101</sup>         |
|         |             | rs1192415    | ODA           | Australia     | C-C     | POAG: 876, C: 883                                   | 2012 | Dimasi <sup>111</sup>       |
|         |             | rs1192415    | POAG          | Eu            | Meta    | POAG: 3161, C: 42837                                | 2011 | Ramdas <sup>96</sup>        |
|         |             | rs1192415    | POAG          | China         | Cases   | 469                                                 | 2015 | Trikha <sup>112</sup>       |
|         |             | rs1192415    | ODA           | EU, Asian     | Meta    | (D) 17248 and 6841                                  | 2015 | Springelkamp <sup>72</sup>  |
|         |             | rs1192415    | VCDR          | EU, Asian     | Meta    | 37930                                               | 2017 | Springelkamp <sup>71</sup>  |
|         |             | rs4658101    | VCDR          | Cau, Asian    | Meta    | (D) 21094 and 6784                                  | 2014 | Springelkamp <sup>75</sup>  |
|         |             | rs4658101    | ODA           | EU, Asian     | Meta    | 37930                                               | 2017 | Springelkamp <sup>71</sup>  |
|         |             | rs4658101    | VCDR          | Latino        | GWAS    | (D): 3596, (R): 941                                 | 2017 | Nannini <sup>99</sup>       |
|         |             | 6:36592986   | CA            | EU, Asian     | Meta    | 37930                                               | 2017 | Springelkamp <sup>71</sup>  |
| 6p21.2  | CDKN1A      | 6:36592986   | POAG          | Cau, Asian    | Meta    | POAG: 6429, C: 41404                                | 2017 | Springelkamp <sup>71</sup>  |
|         |             | rs6913530    | POAG          | Multi-ethnic  | GWAS    | (D) POAG: 4986 C: 58426                             | 2018 | Choquet <sup>69</sup>       |
| 9p21    | CDKN2B(-AS) | rs1063192    | VCDR          | NL, UK        | GWAS    | (D): 7360, (R): 4455                                | 2010 | Ramdas <sup>95</sup>        |
|         |             | rs1063192    | VCDR          | Japan         | C-C     | HTG: 212, NTG: 213, C: 191                          | 2012 | Mabuchi <sup>97</sup>       |
|         |             | rs1063192    | VCDR          | Australia     | C-C     | POAG: 876, C: 883                                   | 2012 | Dimasi <sup>113</sup>       |
|         |             | rs1063192    | POAG          | Japan         | GWAS    | (D) POAG: 1394, C: 6599<br>(R) POAG: 1802, C: 7212  | 2012 | Osman <sup>110</sup>        |
|         |             | rs1063192    | POAG          | Eu            | Meta    | POAG: 3161, C: 42837                                | 2011 | Ramdas <sup>96</sup>        |
|         |             | rs1063192    | POAG          | US-Cau        | C-C     | POAG: 539, C: 336                                   | 2011 | Fan <sup>98</sup>           |
|         |             | rs1063192    | POAG          | Africa        | C-C     | POAG: 272, C: 165                                   | 2012 | Cao <sup>114</sup>          |
|         |             | rs1063192    | VCDR          | Latino        | GWAS    | (D): 3596, (R): 941                                 | 2017 | Nannini <sup>99</sup>       |
|         |             | rs1063192    | POAG          | EU, Asian     | Meta    | POAG: 11316, C: 24055                               | 2017 | Hu <sup>115</sup>           |

Supplemental table 3: Continued

| Loci         | Gene        | Polymorphism | Trait         | Population                          | Study | Size (n)                                            | Year | Reference                   |
|--------------|-------------|--------------|---------------|-------------------------------------|-------|-----------------------------------------------------|------|-----------------------------|
| 9p21         | CDKN2B(-AS) | rs1063192    | -             | Saudi-Arabia                        | C-C   | POAG:87, C:94                                       | 2016 | Abu-Amero <sup>116</sup>    |
|              |             | rs523096     | NTG           | Japan                               | GWAS  | (D) POAG: 286, C: 557<br>(R) POAG: 183, C: 514      | 2012 | Takamoto <sup>117</sup>     |
|              |             | rs523096     | NTG           | Japan                               | GWAS  | (D) POAG: 1244, C: 975                              | 2012 | Nakano <sup>118</sup>       |
|              |             | rs4977756    | POAG          | Australia, NZ                       | GWAS  | (D) POAG: 590, C: 3956<br>(R) POAG: 892, C: 4582    | 2011 | Burdon <sup>119</sup>       |
|              |             | rs4977756    | NTG           | Cau                                 | Meta  | POAG: 3146, C: 3487                                 | 2012 | Wiggs <sup>120</sup>        |
|              |             | rs7049105    | NTG           | Cau                                 | Meta  | POAG: 3146, C: 3487                                 | 2012 | Wiggs <sup>120</sup>        |
|              |             | rs2157719    | NTG,POAG      |                                     |       |                                                     |      |                             |
|              |             | rs2157719    | VCDR          | EU, Asian                           | Meta  | 37930                                               | 2017 | Springelkamp <sup>71</sup>  |
|              |             | rs2157719    | POAG          | Cau, Asian                          | Meta  | POAG: 6429, C: 41404                                | 2017 | Springelkamp <sup>71</sup>  |
|              |             | rs2157719    | POAG          | Spain                               | C-C   | POAG: 391 C: 383                                    | 2017 | Zanon-Moreno <sup>107</sup> |
|              |             | rs2157719    | POAG          | Brazil                              | C-C   | POAG: 310 C: 247                                    | 2018 | Nunes <sup>108</sup>        |
|              |             | rs2157719    | POAG          | Japan                               | C-C   | POAG: 1172, C: 1559                                 | 2017 | Shiga <sup>121</sup>        |
|              |             | rs1360589    | CA            | EU, Asian                           | Meta  | 37930                                               | 2017 | Springelkamp <sup>71</sup>  |
|              |             | rs1360589    | POAG          | Cau, Asian                          | Meta  | POAG: 6429, C: 41404                                | 2017 | Springelkamp <sup>71</sup>  |
|              |             | rs10120688   | POAG          | Australia, NZ                       | GWAS  | (D) POAG: 590, C: 3956<br>(R) POAG: 892, C: 4582    | 2011 | Burdon <sup>119</sup>       |
|              |             | rs10120688   | POAG          | UK                                  | GWAS  | (D) POAG: 387, C: 5380<br>(R) POAG: 294, C: 50      | 2012 | Gibson <sup>122</sup>       |
|              |             | rs10811645   | POAG          | Multi-ethnic                        | GWAS  | (D) POAG: 4986 C: 58426<br>(R) POAG: 7329 C: 169561 | 2018 | Choquet <sup>69</sup>       |
|              |             | rs7865618    | VCDR          | Cau, Asian                          | Meta  | (D) 21094 and 6784                                  | 2014 | Springelkamp <sup>75</sup>  |
|              |             | rs7865618    | ODA           | EU, Asian                           | Meta  | (D) 17248 and 6841                                  | 2015 | Springelkamp <sup>72</sup>  |
|              |             | rs7865618    | VCDR          | Latino                              | GWAS  | (D): 3596, (R): 941                                 | 2017 | Nannini <sup>99</sup>       |
|              |             | rs7866783    | POAG          | US, Australia, EU, Singapore, China | Meta  | (D) POAG: 3853, C: 33480<br>(R) POAG: 3164, C: 9242 | 2016 | Bailey <sup>67</sup>        |
|              |             | rs1333037    | POAG          | Multi-ethnic                        | GWAS  | (D) POAG: 7329 C: 169561<br>(R) POAG: 4986 C: 58426 | 2018 | Choquet <sup>69</sup>       |
| 22q12.1      | CHEK2       | rs1547014    | VCDR          | NL, UK                              | GWAS  | (D): 7360, (R): 4455                                | 2010 | Ramdas <sup>95</sup>        |
|              |             | rs1547014    | VCDR          | Cau                                 | Meta  | POAG: 3146, C: 3487                                 | 2012 | Wiggs <sup>120</sup>        |
|              |             | rs1547014    | VCDR          | Japan                               | C-C   | HTG: 212, NTG: 213, C: 191                          | 2012 | Mabuchi <sup>97</sup>       |
|              |             | rs1547014    | VCDR          | Cau, Asian                          | Meta  | (D) 21094 and 6784                                  | 2014 | Springelkamp <sup>75</sup>  |
|              |             | rs1033667    | CA            | EU, Asian                           | Meta  | (D) 17248 and 6841                                  | 2015 | Springelkamp <sup>72</sup>  |
|              |             | rs5752773    | VCDR, CA, ODA | EU, Asian                           | Meta  | 37930                                               | 2017 | Springelkamp <sup>71</sup>  |
|              |             | rs738722     | VCDR, CA, ODA |                                     |       |                                                     |      |                             |
|              |             | rs5762752    | VCDR, CA, ODA |                                     |       |                                                     |      |                             |
| 15q26.3      | CHSY1       | rs4965359    | CCT           | Asian                               | GWAS  | (D): 7711, (R): 2681                                | 2012 | Cornes <sup>79</sup>        |
|              |             | rs752092     | CCT           | Cau, Asian                          | Meta  | 20000                                               | 2013 | Lu <sup>74</sup>            |
| 2q36-q37     | COL4A3      | rs7606754    | CCT           | Cau, Asian                          | Meta  | 20000                                               | 2013 | Lu <sup>74</sup>            |
|              |             | rs62279163   | CCT           | Europa                              | Meta  | 17803                                               | 2018 | Iglesias <sup>76</sup>      |
|              |             | rs143937055  | IOP           | EU, Asia                            | GWAS  | (D): 69756 (R): 37930                               | 2017 | Choquet <sup>68</sup>       |
|              |             | rs1536482    | CCT           | Croatia, Scotland                   | GWAS  | (D): 1445, (R): 824                                 | 2010 | Vitart <sup>77</sup>        |
| 9q34.2-q34.3 | COL5A1/RXRA | rs1536482    | CCT           | Singapore                           | GWAS  | (D): 5080                                           | 2011 | Vithana <sup>78</sup>       |

Supplemental table 3: Continued

| Loci         | Gene         | Polymorphism              | Trait    | Population   | Study | Size (n)                     | Year | Reference                  |
|--------------|--------------|---------------------------|----------|--------------|-------|------------------------------|------|----------------------------|
| 9q34.2-q34.3 | COL5A1/RXRA  | rs1536482                 | CCT      | Asian        | GWAS  | (D): 7711, (R): 2681         | 2012 | Cornes <sup>79</sup>       |
|              |              | rs1536482                 | CCT      | Germany, NL  | GWAS  | (D): 3931, (R): 1418         | 2012 | Hoehn <sup>123</sup>       |
|              |              | rs1536482                 | CCT      | Cau, Asian   | Meta  | 20000                        | 2013 | Lu <sup>74</sup>           |
|              |              | rs1536482                 | CCT      | Europa       | Meta  | 17803                        | 2018 | Iglesias <sup>76</sup>     |
|              |              | rs1536482                 | CCT      | Asia         | Meta  | 8107                         | 2018 | Iglesias <sup>76</sup>     |
|              |              | rs7044529                 | CCT      | Singapore    | GWAS  | (D): 5080                    | 2011 | Vithana <sup>78</sup>      |
|              |              | rs7044529                 | CCT      | Cau, Asian   | Meta  | 20000                        | 2013 | Lu <sup>74</sup>           |
|              |              | rs3132306                 | CCT      | Germany, NL  | GWAS  | (D): 3931, (R): 1418         | 2012 | Hoehn <sup>123</sup>       |
|              |              | rs3132306                 | CCT      | Asian        | GWAS  | (D): 7711, (R): 2681         | 2012 | Cornes <sup>79</sup>       |
|              |              | rs943423                  | CCT      | Latino US    | GWAS  | (D): 1644, (R ): 124         | 2013 | Gao <sup>124</sup>         |
|              |              | rs3118515                 | CCT      |              |       |                              |      |                            |
| 3q12.1       | COL8A1       | rs3118515                 | CCT      | Latino       | GWAS  | (D): 3584 (R): 931           | 2016 | Gao <sup>125</sup>         |
|              |              | rs2623325                 | VCDR     | Cau, Asian   | Meta  | (D): 21094 and 6784          | 2014 | Springelkamp <sup>75</sup> |
|              |              | rs2623325                 | CA, VCDR | EU, Asian    | Meta  | (D) 17248 and 6841           | 2015 | Springelkamp <sup>72</sup> |
|              |              | rs6804624                 | VCDR, CA | EU, Asian    | Meta  | 37930                        | 2017 | Springelkamp <sup>71</sup> |
| 1p34.2       | COL8A2       | rs1997404                 | ODA      |              |       |                              |      |                            |
|              |              | rs96067                   | CCT      | Singapore    | GWAS  | (D): 5080                    | 2011 | Vithana <sup>78</sup>      |
|              |              | rs96067                   | CCT      | Asian        | GWAS  | (D): 7711, (R): 2681         | 2012 | Cornes <sup>79</sup>       |
|              |              | rs96067                   | CCT      | Cau          | Cases | 100                          | 2010 | Desronvil <sup>126</sup>   |
| 22q11.21     | COMT         | rs96067                   | CCT      | Cau, Asian   | Meta  | 20000                        | 2013 | Lu <sup>74</sup>           |
|              |              | Multiple SNP's (in women) | POAG     | US           | Meta  | HTG: 1637, NTG: 717, C: 3430 | 2013 | Pasquale <sup>127</sup>    |
| 8q21.13      | CRISPLD1     | rs117598310               | CA       | EU, Asian    | Meta  | 37930                        | 2017 | Springelkamp <sup>71</sup> |
| 10q21-22     | CTNNA3       | rs12220165                | ODA      | EU, Asian    | Meta  | 37930                        | 2017 | Springelkamp <sup>71</sup> |
| 5q12.3       | CWC27        | rs10064391                | CCT      | Europa       | Meta  | 17803                        | 2018 | Iglesias <sup>76</sup>     |
| 10q23.33     | CYP26A1/MYOF | rs66479974                | IOP      | EU, Asia     | GWAS  | (D): 69756 (R): 37930        | 2017 | Choquet <sup>68</sup>      |
| 8q21.3       | DCAF4L2      | rs9969524                 | ODA      | EU, Asian    | Meta  | (D) 17248 and 6841           | 2015 | Springelkamp <sup>72</sup> |
|              |              | 8:88744441                | ODA      | EU, Asian    | Meta  | 37930                        | 2017 | Springelkamp <sup>71</sup> |
| 13q13.3      | DCLK1        | rs1926320                 | NTG      | Japan        | C-C   | HTG: 212, NTG: 213, C: 191   | 2012 | Mabuchi <sup>97</sup>      |
|              |              | rs1926320                 | VCDR     | NL, UK       | GWAS  | (D): 7360, (R): 4455         | 2010 | Ramdas <sup>95</sup>       |
|              |              | rs9546434                 | CA, VCDR | EU, Asian    | Meta  | (D) 17248 and 6841           | 2015 | Springelkamp <sup>72</sup> |
|              |              | 13:36629905               | VCDR     | EU, Asian    | Meta  | 37930                        | 2017 | Springelkamp <sup>71</sup> |
|              |              | rs7323428                 | CA       |              |       |                              |      |                            |
| 12q21.33     | DCN          | rs7308752                 | CCT      | Europa       | Meta  | 17803                        | 2018 | Iglesias <sup>76</sup>     |
|              |              | rs7308752                 | CCT      | Asia         | Meta  | 8107                         | 2018 | Iglesias <sup>76</sup>     |
| 14q21        | DDHD1        | rs2251069                 | CA       | EU, Asian    | Meta  | 37930                        | 2017 | Springelkamp <sup>71</sup> |
| 7p21.2       | DGKB         | rs10274998                | VCDR     | EU, Asian    | Meta  | 37930                        | 2017 | Springelkamp <sup>71</sup> |
| 3q27.2-q27.3 | DGKG         | rs9853115                 | IOP      | EU, Asia     | GWAS  | (D): 69756 (R): 37930        | 2017 | Choquet <sup>68</sup>      |
|              |              | rs9853115                 | POAG     | Multi-ethnic | GWAS  | (D) POAG: 7329 C: 169561     | 2018 | Choquet <sup>69</sup>      |
| 1p36.21      | DHRS3        | rs3924048                 | CA, VCDR | EU, Asian    | Meta  | (D) 17248 and 6841           | 2015 | Springelkamp <sup>72</sup> |
| 2q35         | DIRC3        | rs1549733                 | ODA      | EU, Asian    | Meta  | (D) 17248 and 6841           | 2015 | Springelkamp <sup>72</sup> |
|              |              | rs1367187                 | ODA      | EU, Asian    | Meta  | 37930                        | 2017 | Springelkamp <sup>71</sup> |

Supplemental table 3: Continued

| Loci     | Gene          | Polymorphism | Trait         | Population   | Study | Size (n)                                          | Year | Reference                  |
|----------|---------------|--------------|---------------|--------------|-------|---------------------------------------------------|------|----------------------------|
| 11p13    | DNAJC24       | rs542340     | POAG          | AA; Hispanic | GWAS  | (D) POAG: 1702, C: 6067<br>(R) POAG: 489, C: 2685 | 2014 | Hoffmann <sup>128</sup>    |
| 5q35.1   | DUSP1         | rs17658229   | VCDR          | Cau, Asian   | Meta  | (D) 21094 and 6784                                | 2014 | Springelkamp <sup>75</sup> |
|          |               | rs114503346  | VCDR          | EU, Asian    | Meta  | 37930                                             | 2017 | Springelkamp <sup>71</sup> |
|          |               | rs35084382   | CA            | EU, Asian    | Meta  | 37930                                             | 2017 | Springelkamp <sup>71</sup> |
| 2p16.1   | EFEMP1        | rs1346786    | CA, VCDR      | EU, Asian    | Meta  | (D) 17248 and 6841                                | 2015 | Springelkamp <sup>72</sup> |
|          |               | rs3791679    | CA            | EU, Asian    | Meta  | 37930                                             | 2017 | Springelkamp <sup>71</sup> |
|          |               | rs7426380    | IOP           | Multi-ethnic | GWAS  | (D)69,756                                         | 2017 | Choquet <sup>68</sup>      |
| 11p13    | ELP4          | rs11031436   | ODA           | EU, Asian    | Meta  | (D) 17248 and 6841                                | 2015 | Springelkamp <sup>72</sup> |
|          |               | rs555091     | POAG          | AA; Hispanic | GWAS  | (D) POAG: 1702, C: 6067                           | 2014 | Hoffmann <sup>128</sup>    |
|          |               | rs506227     | POAG          |              |       | (R) POAG: 489, C: 2685                            |      |                            |
| 10q25.3  | ENO4          | rs1681739    | VCDR, CA, ODA | EU, Asian    | Meta  | 37930                                             | 2017 | Springelkamp <sup>71</sup> |
| 6p25.3   | EXOC2         | rs17756712   | VCDR          | Cau, Asian   | Meta  | (D) 21094 and 6784                                | 2014 | Springelkamp <sup>75</sup> |
|          |               | rs2073006    | POAG          | Multi-ethnic | GWAS  | (D) POAG: 7329 C: 169561                          | 2018 | Choquet <sup>69</sup>      |
| 1q24.2   | F5            | rs12406092   | ODA           | EU, Asian    | Meta  | (D) 17248 and 6841                                | 2015 | Springelkamp <sup>72</sup> |
|          |               | rs10753787   | VCDR          | EU, Asian    | Meta  | 37930                                             | 2017 | Springelkamp <sup>71</sup> |
|          |               | rs201655303  | ODA           |              |       |                                                   |      |                            |
| 6q14.1   | FAM46A        | rs1931656    | CCT           | Europa       | Meta  | 17803                                             | 2018 | Iglesias <sup>76</sup>     |
|          |               | rs1931656    | CCT           | Asia         | Meta  | 8107                                              | 2018 | Iglesias <sup>76</sup>     |
| 16p13.3  | FAM86A/RBFOX1 | rs192917960  | POAG          | AA; Hispanic | GWAS  | (D) POAG: 1702, C: 6067<br>(R) POAG: 489, C: 2685 | 2014 | Hoffmann <sup>128</sup>    |
| 12q24.31 | FAM101A       | rs10846617   | CA, VCDR      | EU, Asian    | Meta  | (D) 17248 and 6841                                | 2015 | Springelkamp <sup>72</sup> |
|          |               | rs7311936    | VCDR          | EU, Asian    | Meta  | 37930                                             | 2017 | Springelkamp <sup>71</sup> |
|          |               | rs11613189   | CA            |              |       |                                                   |      |                            |
| 9q33.3   | FAM125B       | rs2286885    | IOP           | UK, EU       | GWAS  | (D): 2774, (R ): 22789                            | 2014 | Nag <sup>129</sup>         |
| 15q26.3  | FAM169B       | rs6598351    | CA            | EU, Asian    | Meta  | 37930                                             | 2017 | Springelkamp <sup>71</sup> |
| 5q21.3   | FBXL17/FER    | rs73220188   | IOP           | EU, Asia     | GWAS  | (D): 69756 (R): 37930                             | 2017 | Choquet <sup>68</sup>      |
| 3p14.3   | FLNB          | rs6764184    | CA, VCDR      | EU, Asian    | Meta  | (D) 17248 and 6841                                | 2015 | Springelkamp <sup>72</sup> |
|          |               | rs6764184    | CA, VCDR      | EU, Asian    | Meta  | 37930                                             | 2017 | Springelkamp <sup>71</sup> |
|          |               | rs12494328   | CA            |              |       |                                                   |      |                            |
|          |               | rs12494328   | POAG          | Cau, Asian   | Meta  | POAG: 6429, C: 41404                              | 2017 | Springelkamp <sup>71</sup> |
| 2q23.3   | FMNL2         | rs55692468   | IOP           | EU, Asia     | GWAS  | (D): 69756 (R): 37930                             | 2017 | Choquet <sup>68</sup>      |
|          |               | rs56117902   | POAG, IOP     | Multi-ethnic | GWAS  | (D) POAG: 4986 C: 58426                           | 2018 | Choquet <sup>69</sup>      |
| 3q25.31  | FNDC3B        | rs4894535    | CCT           | Cau, Asian   | Meta  | 20000                                             | 2013 | Lu <sup>74</sup>           |
|          |               | rs4894535    | POAG          | Cau          | C-C   | POAG: 2979, C: 7399                               | 2013 | Lu <sup>74</sup>           |
|          |               | rs6445055    | IOP           | Asian, EU    | Meta  | (D): 35296                                        | 2014 | Hysi <sup>65</sup>         |
|          |               | rs6445055    | POAG          | Cau          | Meta  | POAG: 4284, C: 95560                              | 2014 | Hysi <sup>65</sup>         |
|          |               |              |               | EU, Asian    | Meta  | 37930                                             | 2017 | Springelkamp <sup>71</sup> |
|          |               | rs7617946    | CCT           | Europa       | Meta  | 17803                                             | 2018 | Iglesias <sup>76</sup>     |
|          |               | rs7617946    | CCT           | Asia         | Meta  | 8107                                              | 2018 | Iglesias <sup>76</sup>     |
|          |               | rs7635832    | IOP           | EU, Asia     | GWAS  | (D): 69756 (R): 37930                             | 2017 | Choquet <sup>68</sup>      |
| 13q12.11 | FGF9-SGCG     | rs7327928    | CCT           | Europa       | Meta  | 17803                                             | 2018 | Iglesias <sup>76</sup>     |
| 6p25.3   | FOXC1         | rs2745572    | IOP           | EU, Asia     | GWAS  | (D): 69756 (R): 37930                             | 2017 | Choquet <sup>68</sup>      |

Supplemental table 3: Continued

| Loci    | Gene           | Polymorphism  | Trait         | Population                          | Study | Size (n)                                            | Year | Reference                   |
|---------|----------------|---------------|---------------|-------------------------------------|-------|-----------------------------------------------------|------|-----------------------------|
| 6p25.3  | FOXC1          | rs2745572     | POAG          | US, Australia, EU, Singapore, China | Meta  | (D) POAG: 3853, C: 33480<br>(R) POAG: 3164, C: 9242 | 2016 | Bailey <sup>67</sup>        |
| 13q14.1 | FOXO1          | rs2721051     | CCT           | Cau, Asian                          | Meta  | 20000                                               | 2013 | Lu <sup>74</sup>            |
|         |                | rs2755238     | CCT           | Europa                              | Meta  | 17803                                               | 2018 | Iglesias <sup>76</sup>      |
|         |                | rs1161662     | IOP           | Multi-ethnic                        | GWAS  | (D)69,756                                           | 2017 | Choquet <sup>68</sup>       |
| 17p13.1 | GAS7           | rs11656696    | IOP           | NL, UK, Australia, NZ               | GWAS  | (D) 11927, (R) 7482                                 | 2012 | Koolwijk van <sup>130</sup> |
|         |                | rs11656696    | POAG          | NL                                  | Meta  | POAG: 1432, C: Unknown                              | 2012 | Koolwijk van <sup>130</sup> |
|         |                | rs11656696    | -             | Saudi-Arabia                        | C-C   | POAG: 92, C:95                                      | 2017 | Kondkar <sup>131</sup>      |
|         |                | rs9913911     | IOP           | Asian, EU                           | Meta  | (D): 35296                                          | 2014 | Hysi <sup>65</sup>          |
|         |                | rs9913911     | POAG          | Cau                                 | Meta  | POAG: 4284, C: 95560                                | 2014 | Hysi <sup>65</sup>          |
|         |                | rs9913911     | IOP, VCDR, CA | EU, Asian                           | Meta  | 37930                                               | 2017 | Springelkamp <sup>71</sup>  |
|         |                | rs9913911     | POAG          | Cau, Asian                          | Meta  | POAG: 6429, C: 41404                                | 2017 | Springelkamp <sup>71</sup>  |
|         |                | rs9913911     | POAG          | Japan                               | C-C   | POAG: 1172, C: 1559                                 | 2017 | Shiga <sup>121</sup>        |
|         |                | rs9913911     | IOP           | EU, Asia                            | GWAS  | (D): 69756 (R): 37930                               | 2017 | Choquet <sup>68</sup>       |
|         |                | rs9913911     | POAG, IOP     | Multi-ethnic                        | GWAS  | (D) POAG: 4986 C: 58426<br>(R) POAG: 7329 C: 169561 | 2018 | Choquet <sup>69</sup>       |
|         |                | rs9913911     | POAG          | Multi-ethnic                        | GWAS  | (D) POAG: 7329 C: 169561<br>(R) POAG: 4986 C: 58426 | 2018 | Choquet <sup>69</sup>       |
|         |                | rs9897123     | POAG          | US, Australia, EU, Singapore, China | Meta  | (D) POAG: 3853, C: 33480<br>(R) POAG: 3164, C: 9242 | 2016 | Bailey <sup>67</sup>        |
| 7p21    | GLCC11/ICA1    | rs59072263    | IOP           | Australia, UK                       | GWAS  | (D): 2175, (R): 4866                                | 2013 | BMES <sup>132</sup>         |
| 12q23   | GLT8D2         | rs1564892     | CCT           | Cau, Asian                          | Meta  | 20000                                               | 2013 | Lu <sup>74</sup>            |
|         |                | rs11111869    | CCT           | Europa                              | Meta  | 17803                                               | 2018 | Iglesias <sup>76</sup>      |
|         |                | rs11111869    | CCT           | Asia                                | Meta  | 8107                                                | 2018 | Iglesias <sup>76</sup>      |
| 6p25.3  | GMDS           | rs3046543     | POAG          | Australia, US                       | GWAS  | (D) POAG: 1155, C: 1992<br>(R) POAG: 3558, C: 9496  | 2014 | Gharahkhani <sup>66</sup>   |
|         |                | rs11969985    | POAG          |                                     |       |                                                     |      |                             |
| 1p13.3  | GSTM1          | rs114096562   | POAG          |                                     |       |                                                     |      |                             |
|         |                | null>positive | POAG          | Italy                               | C-C   | POAG: 42, C: 45                                     | 2003 | Izzotti <sup>133</sup>      |
|         |                | null>positive | POAG          | Arabic                              | C-C   | POAG: 153, C: 159                                   | 2005 | Yildirim <sup>134</sup>     |
|         |                | null>positive | POAG          | Turkey                              | C-C   | POAG: 49, C: 120                                    | 2008 | Abu-Amro <sup>135</sup>     |
|         |                | null>positive | POAG          | Brazil                              | C-C   | POAG: 87, C: 85                                     | 2011 | Rocha <sup>136</sup>        |
|         |                | null>positive | POAG          | Cau, Asian                          | Meta  | POAG: 1339, C: 1412                                 | 2013 | Huang <sup>137</sup>        |
|         |                | null>positive | POAG          | Greece                              | C-C   | POAG: 106, C: 120                                   | 2016 | Lavaris <sup>138</sup>      |
|         |                | null>positive | -             | Serbia                              | C-C   | POAG: 102, C:202                                    | 2017 | Stamenkovic <sup>139</sup>  |
|         |                | positive>null | POAG          | Estonia                             | C-C   | POAG: 250, C: 202                                   | 2000 | Juronen <sup>140</sup>      |
|         |                | positive>null | POAG          | Turkey                              | C-C   | POAG: 144, C: 121                                   | 2007 | Unal <sup>141</sup>         |
|         |                | positive>null | POAG          | Cau, Asian                          | meta  | POAG: 1984 C: 1760                                  | 2017 | Malik <sup>142</sup>        |
| 17p12   | HS3ST3B1/PMP22 | rs12940030    | CCT           | Cau, Asian                          | Meta  | 20000                                               | 2013 | Lu <sup>74</sup>            |
|         |                | rs9900807     | CCT           | Europa                              | Meta  | 17803                                               | 2018 | Iglesias <sup>76</sup>      |
|         |                | rs9900807     | CCT           | Asia                                | Meta  | 8107                                                | 2018 | Iglesias <sup>76</sup>      |
| 6q22.31 | HSF2           | rs1402538     | VCDR          | Cau, Asian                          | Meta  | (D) 21094 and 6784                                  | 2014 | Springelkamp <sup>75</sup>  |

Supplemental table 3: Continued

| Loci         | Gene          | Polymorphism | Trait       | Population    | Study   | Size (n)                                         | Year | Reference                  |
|--------------|---------------|--------------|-------------|---------------|---------|--------------------------------------------------|------|----------------------------|
| 6q22.31      | HSF2          | rs1402538    | CA, VCDR    | EU, Asian     | Meta    | (D) 17248 and 6841                               | 2015 | Springelkamp <sup>72</sup> |
|              |               | rs2684249    | CA          | EU, Asian     | Meta    | 37930                                            | 2017 | Springelkamp <sup>71</sup> |
| 22q12.2      | HORMAD2       | rs2412970    | ODA         | EU, Asian     | Meta    | (D) 17248 and 6841                               | 2015 | Springelkamp <sup>72</sup> |
| 6q14.1       | IBTK          | rs1538138    | CCT         | US-Cau        | GWAS    | (D): 1117                                        | 2012 | Ulmer <sup>80</sup>        |
|              |               | rs1538138    | CCT         | Asian         | GWAS    | (D): 7711, @: 2681                               | 2012 | Cornes <sup>79</sup>       |
|              |               | rs1538138    | CCT         | Cau, Asian    | Meta    | 20000                                            | 2013 | Lu <sup>74</sup>           |
|              | IBTK / FAM46A | rs2875087    | IOP         | Multi-ethnic  | GWAS    | (D)69,756                                        | 2017 | Choquet <sup>68</sup>      |
| 11p13        | IMMP1L        | rs1223068    | ODA         | EU, Asian     | Meta    | 37930                                            | 2017 | Springelkamp <sup>71</sup> |
| 17q21.32     | KPNB1         | rs11870935   | CA, VCDR    | EU, Asian     | Meta    | (D) 17248 and 6841                               | 2015 | Springelkamp <sup>72</sup> |
| 9q34.2-q34.3 | LCN12/PTGDS   | rs11145951   | CCT         | Cau, Asian    | Meta    | 20000                                            | 2013 | Lu <sup>74</sup>           |
| 9q31.3       | LPAR1         | rs1007000    | CCT         | Cau, Asian    | Meta    | 20000                                            | 2013 | Lu <sup>74</sup>           |
|              |               | rs10817107   | CCT         | Europa        | Meta    | 17803                                            | 2018 | Iglesias <sup>76</sup>     |
|              |               |              | CCT         | Asia          | Meta    | 8107                                             | 2018 | Iglesias <sup>76</sup>     |
| 2q21.2-q22.2 | LRP1B         | rs2381190    | ODA         | NL            | Linkage | 23000                                            | 2011 | Axenovich <sup>94</sup>    |
|              |               | rs491391     | ODA         | Australia, UK | GWAS    | (D): 1368, (R): 848                              | 2010 | Macgregor <sup>100</sup>   |
| 15q26.3      | LRRK1         | rs930847     | CCT         | Cau, Asian    | Meta    | 20000                                            | 2013 | Lu <sup>74</sup>           |
|              |               | rs930847     | CCT         | Europa        | Meta    | 17803                                            | 2018 | Iglesias <sup>76</sup>     |
|              |               | rs930847     | CCT         | Asia          | Meta    | 8107                                             | 2018 | Iglesias <sup>76</sup>     |
| 2p22-21      | LTBP1         | rs115781177  | CCT         | Europa        | Meta    | 17803                                            | 2018 | Iglesias <sup>76</sup>     |
|              |               | rs115179432  | IOP         | Multi-ethnic  | GWAS    | (D)69,756                                        | 2017 | Choquet <sup>68</sup>      |
| 5q22.1       | MIR548F3      | rs596169     | IOP         | EU, Asia      | GWAS    | (D): 69756 (R): 37930                            | 2017 | Choquet <sup>68</sup>      |
| 9p23         | MPDZ/NF1B     | rs1324183    | CCT         | Cau, Asian    | Meta    | 20000                                            | 2013 | Lu <sup>74</sup>           |
| 11q22.2      | MMP1          | rs1799750    | POAG        | Poland        | C-C     | POAG 196, C: 253                                 | 2011 | Majsterek <sup>143</sup>   |
|              |               | rs1799750    | RNFLT, POAG | Cau           | C-C     | POAG: 255, C: 256                                | 2013 | Markiewicz <sup>144</sup>  |
|              |               | rs1799750    | POAG        | Pakistan      | C-C     | POAG: 112, C: 118                                | 2013 | Micheal <sup>145</sup>     |
|              |               | rs1799750    | POAG        | Cau,Asian     | Meta    | POAG: 1261, C: 1089                              | 2016 | He <sup>146</sup>          |
| 20q13.2      | MMP9          | rs3918249    | POAG        | Cau, Asian    | Meta    | POAG: 550, C: 794                                | 2016 | Zhang <sup>147</sup>       |
|              |               | rs3918249    | RNFLT, VCDR | Cau           | C-C     | POAG: 255, C: 256                                | 2013 | Markiewicz <sup>144</sup>  |
|              |               | rs3918242    | POAG        | India         | C-C     | POAG: 224, C: 367                                | 2018 | Thakur <sup>148</sup>      |
|              |               | rs17576      | -           | Cau, Asian    | Meta    | POAG: 1357, C: 1432                              | 2016 | Zhang <sup>147</sup>       |
|              |               | rs2274755    | NTG         | South Korea   | C-C     | HTG: 146, HTG: 174, C: 380                       | 2018 | Suh 2017 <sup>149</sup>    |
| 5q11.2       | MOCS2/FST     | Rs4865762    | IOP         | EU, Asia      | GWAS    | (D): 69756 (R): 37930                            | 2017 | Choquet <sup>68</sup>      |
| 2q21.2       | NCKAP5        | rs7588567    | POAG        | Japan         | GWAS    | (D) POAG: 1394, C: 6599, (R) POAG: 1802, C: 7212 | 2012 | Osman <sup>110</sup>       |
| 8q22.1       | NDUFAF6       | rs10429294   | CCT         | Europa        | Meta    | 17803                                            | 2018 | Iglesias <sup>76</sup>     |
| 7q36         | NOS3          | rs3918226    | POAG        | Australia     | C-C     | POAG: 53, C: 60                                  | 1998 | Tunny <sup>150</sup>       |
|              |               | rs3918226    | -           | China         | C-C     | HTG: 255, NTG: 100, C: 201                       | 2010 | Fan <sup>60</sup>          |
|              |               | Intron-4     | POAG        | Pakistan      | C-C     | POAG: 159, C: 166                                | 2010 | Ayub <sup>151</sup>        |
|              |               | Intron-4     | -           | China         | C-C     | POAG: 66, C: 100                                 | 2005 | Lin <sup>152</sup>         |
|              |               | rs2070744    | POAG        | Egypt         | C-C     | POAG: 160, C: 110                                | 2014 | Emam <sup>153</sup>        |
|              |               | rs2070744    | POAG        | Cau           | C-C     | POAG: 527, C: 1539                               | 2011 | Kang <sup>154</sup>        |
|              |               | rs2070744    | POAG        | Cau, Asian    | Meta    | POAG: 1156, C: 1879                              | 2016 | Xiang <sup>155</sup>       |
|              |               | rs2070744    | NTG         | Korea         | C-C     | NTG: 251, C: 245                                 | 2017 | Jeoung <sup>156</sup>      |

Supplemental table 3: Continued

| Loci     | Gene  | Polymorphism           | Trait | Population  | Study | Size (n)                        | Year | Reference                         |
|----------|-------|------------------------|-------|-------------|-------|---------------------------------|------|-----------------------------------|
| 7q36     | NOS3  | rs2070744              | -     | UK          | C-C   | HTG: 58, NTG: 76, C: 38         | 2005 | Logan <sup>157</sup>              |
|          |       | rs2070744              | -     | China       | C-C   | POAG: 66, C: 100                | 2005 | Lin <sup>152</sup>                |
|          |       | rs2070744              | -     | China       | C-C   | HTG: 255, NTG: 100, C: 201      | 2010 | Fan <sup>60</sup>                 |
|          |       | rs2070744              | -     | EU-Cau      | Cases | HTG: 300, NTG: 127              | 2012 | Weiss <sup>158</sup>              |
|          |       | rs3918188              | POAG  | US-Cau      | C-C   | POAG: 527, C: 1543              | 2010 | Kang <sup>159</sup>               |
|          |       | rs3918188              | POAG  | Brazil      | C-C   | POAG: 90, C: 127                | 2012 | Magalhaes da Silva <sup>160</sup> |
|          |       | rs3918188              | POAG  | Cau         | C-C   | POAG: 374, C: 1085              | 2011 | Kang <sup>161</sup>               |
|          |       | rs3793342 + rs11771443 | POAG  | China       | C-C   | POAG: 102, C: 120               | 2011 | Liao <sup>162</sup>               |
|          |       | rs2333227              | -     | China       | C-C   | POAG: 66, C: 100                | 2005 | Lin <sup>152</sup>                |
|          |       | rs1799983              | POAG  | Cau, Asian  | Meta  | POAG: 1230, C: 2035             | 2016 | Xiang <sup>155</sup>              |
|          |       | rs1799983              | -     | China       | C-C   | HTG: 255, NTG: 100, C: 201      | 2010 | Fan <sup>60</sup>                 |
|          |       | rs1799983              | -     | EU-Cau      | Cases | HTG: 300, NTG: 127              | 2012 | Weiss <sup>158</sup>              |
| 15q26.2  | NR2F2 | rs8034595              | ODA   | EU, Asian   | Meta  | (D) 17248 and 6841              | 2015 | Springelkamp <sup>72</sup>        |
| 4q31     | NR3C2 | rs3931397              | CCT   | Cau, Asian  | Meta  | 20000                           | 2013 | Lu <sup>74</sup>                  |
| 19q13.33 | NTF4  | c.20G > A              | POAG  | Germany, NL | GWAS  | (D) HTG: 270, NTG: 82, C: 376   | 2009 | Pasutto <sup>163</sup>            |
|          |       | rs61732310             | POAG  |             |       | (R) HTG: 338, NTG: 266, C: 1414 |      |                                   |
|          |       | c.269G > A             | POAG  |             |       |                                 |      |                                   |
|          |       | rs121918427            | POAG  |             |       |                                 |      |                                   |
|          |       | rs121918428            | POAG  | China       | C-C   | POAG: 174, C: 91                | 2010 | Vithana <sup>164</sup>            |
|          |       | c.338T > C             | POAG  |             |       | POAG: 720, C: 950               | 2012 | Chen <sup>165</sup>               |
|          |       | c.470G > C             | POAG  | China       | C-C   |                                 |      |                                   |
|          |       | c.545C > T             | POAG  | Eu          | C-C   | POAG: 443, C: 533               | 2010 | Liu <sup>166</sup>                |
|          |       | genewide               | -     |             |       | POAG: 141, C: 285               | 2010 | Rao <sup>167</sup>                |
|          |       | genewide               | -     | India       | C-C   |                                 |      |                                   |
|          |       | rs747782               | IOP   | Asian, EU   | Meta  | (D): 35296                      | 2014 | Hysi <sup>65</sup>                |
|          |       | rs1681630              | IOP   |             |       |                                 |      |                                   |
|          |       | rs7946766              | IOP   |             |       |                                 |      |                                   |
| 3q28-q29 | OPA1  | rs166850               | NTG   | UK          | C-C   | NTG: 163, C: 186                | 2002 | Aung <sup>168</sup>               |
|          |       | rs166850               | NTG   | UK          | C-C   | HTG: 67, NTG: 70, C: 75         | 2010 | Yu-Wai-Man <sup>169</sup>         |
|          |       | rs166850               | NTG   | Cau, Asian  | Meta  | HTG: 1200, NTG: 713, C: 1935    | 2012 | Guo <sup>170</sup>                |
|          |       | rs166850               | -     | Greece      | C-C   | POAG: 106, C: 120               | 2016 | Lavaris <sup>138</sup>            |
|          |       | rs166850               | -     | Korea       | C-C   | NTG: 75, C: 101                 | 2004 | Woo <sup>171</sup>                |
|          |       | rs166850               | -     | Germany     | C-C   | NTG: 285, C: 282                | 2009 | Wolf <sup>59</sup>                |
|          |       | rs166850               | -     | China       | C-C   | HTG: 255, NTG: 100, C: 201      | 2010 | Fan <sup>60</sup>                 |
|          |       | rs10451941             | NTG   | UK          | C-C   | NTG: 163, C: 186                | 2002 | Aung <sup>168</sup>               |
|          |       | rs10451941             | NTG   | UK          | C-C   | NTG: 61, C: 49                  | 2003 | Powell <sup>172</sup>             |
|          |       | rs10451941             | NTG   | Japan       | C-C   | HTG: 191, NTG: 194, C: 185      | 2007 | Mabuchi <sup>173</sup>            |
|          |       | rs10451941             | NTG   | UK          | C-C   | HTG: 67, NTG: 70, C: 75         | 2010 | Yu-Wai-Man <sup>169</sup>         |
|          |       | rs10451941             | NTG   | Cau, Asian  | Meta  | HTG: 1200, NTG: 713, C: 1935    | 2012 | Guo <sup>170</sup>                |
|          |       | rs10451941             | -     | Korea       | C-C   | NTG: 75, C: 101                 | 2004 | Woo <sup>171</sup>                |

Supplemental table 3: Continued

| Loci     | Gene    | Polymorphism | Trait    | Population     | Study   | Size (n)                                           | Year | Reference                  |
|----------|---------|--------------|----------|----------------|---------|----------------------------------------------------|------|----------------------------|
| 3q28-q29 | OPA1    | rs10451941   | -        | Germany        | C-C     | NTG: 285, C: 282                                   | 2009 | Wolf <sup>59</sup>         |
|          |         | rs10451941   | -        | China          | C-C     | HTG: 255, NTG: 100, C: 201                         | 2010 | Fan <sup>60</sup>          |
|          |         | rs10451941   | -        | Greece         | C-C     | POAG: 106, C: 120                                  | 2016 | Lavaris <sup>138</sup>     |
| 11p13    | PAX6    | rs3026398    | CCT      | Au-Cau         | PC      | 956                                                | 2010 | Dimasi <sup>111</sup>      |
|          |         | rs7104512    | ODA      | NL             | GWAS    | (D): 5312, (R): 5933                               | 2012 | Gasten <sup>174</sup>      |
|          |         | rs10835818   | ODA      |                |         |                                                    |      |                            |
|          |         | rs7126851    | ODA      | NL             | GWAS    | (D): 5312, (R): 5933                               | 2012 | Gasten <sup>174</sup>      |
| 5p13.3   | PDZD2   | rs72759609   | VCDR     | EU, Asian      | Meta    | 37930                                              | 2017 | Springelkamp <sup>71</sup> |
| 8q21.13  | PKIA    | rs78150043   | IOP      | Eu             | Meta    | 29578                                              | 2017 | Springelkamp <sup>71</sup> |
|          |         | 8:78380944   | IOP      |                |         |                                                    |      |                            |
| 10q23.33 | PLCE1   | rs7072574    | VCDR     | Cau, Asian     | Meta    | (D) 21094 and 6784                                 | 2014 | Springelkamp <sup>75</sup> |
|          |         | 10:96008348  | VCDR, CA | EU, Asian      | Meta    | 37930                                              | 2017 | Springelkamp <sup>71</sup> |
|          |         | rs2274224    | POAG     | Multi-ethnic   | GWAS    | (D) POAG: 7329 C: 169561                           | 2018 | Choquet <sup>69</sup>      |
| 10p12.31 | PLXDC2  | rs7081455    | POAG     | Japan          | GWAS    | (D) POAG: 418, C:300<br>(R) POAG: 409, C 448       | 2009 | Nakano <sup>175</sup>      |
|          |         | rs7081455    | -        | China          | C-C     | POAG: 462, C: 577                                  | 2012 | Chen <sup>176</sup>        |
|          |         | rs7081455    | -        | Africa         | C-C     | POAG: 272, C: 165                                  | 2012 | Cao <sup>114</sup>         |
|          |         | rs7081455    | -        | Saudi-Arabia   | C-C     | POAG: 188, C: 164                                  | 2018 | Kondkar <sup>177</sup>     |
|          |         | rs7098387    | POAG     | Korea          | C-C     | POAG: 211, C: 904                                  | 2014 | Kim <sup>178</sup>         |
| 16p13.2  | PMM2    | rs3785176    | POAG     | China          | GWAS    | (D) POAG: 1007, C: 1009<br>(R) POAG: 1899, C: 4965 | 2014 | Chen <sup>70</sup>         |
|          |         | rs67792030   | POAG     |                |         |                                                    |      |                            |
| 17p13.1  | POLR2A  | 17:7423981   | CCT      | Europa         | Meta    | 17803                                              | 2018 | Iglesias <sup>76</sup>     |
| 1p36.32  | PRDM16  | rs199942561  | ODA      | EU, Asian      | Meta    | 37930                                              | 2017 | Springelkamp <sup>71</sup> |
| 9q34.2   | PRR31   | rs2386136    | CCT      | Europa         | Meta    | 17803                                              | 2018 | Iglesias <sup>76</sup>     |
| 8q24.2   | PSCA    | rs2920293    | VCDR     | EU, Asian      | Meta    | 37930                                              | 2017 | Springelkamp <sup>71</sup> |
| 7q11.21  | RABGEF1 | rs68168107   | CCT      | Europa         | Meta    | 17803                                              | 2018 | Iglesias <sup>76</sup>     |
|          |         | rs68168107   | CCT      | Asia           | Meta    | 8107                                               | 2018 | Iglesias <sup>76</sup>     |
| 11p11.2  | RAPSN   | rs12419342   | IOP      | Asian, EU      | Meta    | (D): 35296                                         | 2014 | Hysi <sup>65</sup>         |
|          |         | rs12419342   | POAG     | Cau            | Meta    | POAG: 4284, C: 95560                               | 2014 | Hysi <sup>65</sup>         |
|          |         | rs12419342   | IOP      | Norfolk island | Cases   | Population: 330                                    | 2017 | Matovinovic <sup>179</sup> |
|          |         | rs79390637   | IOP      | EU, Asia       | GWAS    | (D): 69756 (R): 37930                              | 2017 | Choquet                    |
| 3p24.2   | RARB    | rs11129176   | ODA      | EU, Asian      | Meta    | (D) 17248 and 6841                                 | 2015 | Springelkamp <sup>72</sup> |
|          |         | rs11129176   | ODA      | EU, Asian      | Meta    | 37930                                              | 2017 | Springelkamp <sup>71</sup> |
| 14q11.2  | RBM23   | 14:23388793  | VCDR     | EU, Asian      | Meta    | 37930                                              | 2017 | Springelkamp <sup>71</sup> |
| 1p36.23  | RERE    | rs301801     | VCDR     | Cau, Asian     | Meta    | (D) 21094 and 6784                                 | 2014 | Springelkamp <sup>75</sup> |
|          |         | rs301801     | CA, VCDR | EU, Asian      | Meta    | (D) 17248 and 6841                                 | 2015 | Springelkamp <sup>72</sup> |
|          |         | rs12015126   | CA, VCDR | NL             | Linkage | 23000                                              | 2011 | Axenovich <sup>94</sup>    |
|          |         | rs12015126   | -        | NL, UK         | GWAS    | (D): 7360, (R): 4455                               | 2010 | Ramdas <sup>95</sup>       |
|          |         | rs12015126   | -        | Japan          | C-C     | HTG: 212, NTG: 213, C: 191                         | 2012 | Mabuchi <sup>97</sup>      |
|          |         | rs2252865    | CA       | EU, Asian      | Meta    | 37930                                              | 2017 | Springelkamp <sup>71</sup> |
| 3p24.3   | RFTN1   | rs690037     | CA       | Australia, UK  | GWAS    | (D): 1368, (R): 848                                | 2010 | Macgregor <sup>100</sup>   |
|          |         | rs690037     | CCT      | China          | C-C     | HTG: 117, NTG: 25, C: 289                          | 2012 | Chen <sup>103</sup>        |
| 12q13.11 | RPAP3   | rs11168187   | VCDR     | Cau, Asian     | Meta    | (D) 21094 and 6784                                 | 2014 | Springelkamp <sup>75</sup> |

Supplemental table 3: Continued

| Loci      | Gene      | Polymorphism | Trait         | Population                             | Study   | Size (n)                                            | Year | Reference                   |
|-----------|-----------|--------------|---------------|----------------------------------------|---------|-----------------------------------------------------|------|-----------------------------|
| 1p31      | RPE65     | rs1925953    | VCDR          | EU, Asian                              | Meta    | 37930                                               | 2017 | Springelkamp <sup>71</sup>  |
| 6p25      | RREB1     | rs4960295    | VCDR          | EU, Asian                              | Meta    | 37930                                               | 2017 | Springelkamp <sup>71</sup>  |
| 16q12.1   | SALL1     | rs1362756    | ODA           | NL, UK                                 | GWAS    | (D): 7360, (R): 4455                                | 2010 | Ramdas <sup>95</sup>        |
|           |           | rs1362756    | POAG          | EU                                     | Meta    | POAG: 3161, C: 42837                                | 2011 | Ramdas <sup>96</sup>        |
|           |           | rs1362756    | ODA, CA, VCDR | EU, Asian                              | Meta    | (D) 17248 and 6841                                  | 2015 | Springelkamp <sup>72</sup>  |
|           |           | rs1362756    | -             | Singapore, NL                          | GWAS    | (D): 4445, (R): 9236                                | 2011 | Khor <sup>101</sup>         |
|           |           | rs1362756    | -             | NL                                     | GWAS    | (D): 5312, (R): 5933                                | 2012 | Gasten <sup>174</sup>       |
|           |           | rs1345467    | VCDR          | Cau, Asian                             | Meta    | (D) 21094 and 6784                                  | 2014 | Springelkamp <sup>75</sup>  |
|           |           | rs1345467    | ODA           | EU, Asian                              | Meta    | 37930                                               | 2017 | Springelkamp <sup>75</sup>  |
|           |           | rs11646917   | CA            | EU, Asian                              | Meta    | (D) 17248 and 6841                                  | 2015 | Springelkamp <sup>72</sup>  |
|           |           | rs11646917   | CA            | EU, Asian                              | Meta    | 37930                                               | 2017 | Springelkamp <sup>75</sup>  |
|           |           | rs66983417   | VCDR, CA, ODA | EU, Asian                              | Meta    | 37930                                               | 2017 | Springelkamp <sup>75</sup>  |
| 11q13.1   | SCYL1     | rs17146964   | VCDR          | NL, UK                                 | GWAS    | (D): 7360, (R): 4455                                | 2010 | Ramdas <sup>95</sup>        |
|           |           | rs17146964   | -             | Japan                                  | C-C     | HTG: 212, NTG: 213, C: 191                          | 2012 | Mabuchi <sup>97</sup>       |
| 14p22-p23 | SIX1/SIX6 | rs10483727   | VCDR          | NL, UK                                 | GWAS    | (D): 7360, (R): 4455                                | 2010 | Ramdas <sup>95</sup>        |
|           |           | rs10483727   | RNFLT         | NL                                     | Linkage | 23000                                               | 2011 | Axenovich <sup>94</sup>     |
|           |           | rs10483727   | POAG          | Eu                                     | Meta    | POAG: 3161, C: 42837                                | 2011 | Ramdas <sup>96</sup>        |
|           |           | rs10483727   | VCDR, POAG    | US-Cau                                 | C-C     | POAG: 539, C: 336                                   | 2011 | Fan <sup>98</sup>           |
|           |           | rs10483727   | POAG          | Japan                                  | GWAS    | (D) POAG: 1394, C: 6599<br>(R) POAG: 1802, C: 7212  | 2012 | Osman <sup>110</sup>        |
|           |           | rs10483727   | POAG          | Cau                                    | Meta    | POAG: 3146, C: 3487                                 | 2012 | Wiggs <sup>120</sup>        |
|           |           | rs10483727   | VCDR, POAG    | Australia                              | C-C     | POAG: 876, C: 883                                   | 2012 | Dimasi <sup>113</sup>       |
|           |           | rs10483727   | -             | Africa                                 | C-C     | POAG: 272, C: 165                                   | 2012 | Cao <sup>114</sup>          |
|           |           | rs10483727   | -             | Japan                                  | C-C     | HTG: 212, NTG: 213, C: 191                          | 2012 | Mabuchi <sup>97</sup>       |
|           |           | rs10483727   | -             | UK                                     | GWAS    | (D) POAG: 387, C: 5380<br>(R) POAG: 294, C: 50      | 2012 | Gibson <sup>122</sup>       |
|           |           | rs10483727   | RNFLT         | EU                                     | Cases   | 231                                                 | 2015 | Kuo <sup>180</sup>          |
|           |           | rs10483727   | VCDR          | India                                  | C-C     | POAG: 97, C: 371                                    | 2015 | Philomenadin <sup>104</sup> |
|           |           | rs10483727   | CA            | EU, Asian                              | Meta    | (D) 17248 and 6841                                  | 2015 | Springelkamp <sup>72</sup>  |
|           |           | rs10483727   | POAG          | China                                  | C-C     | POAG: 866, C: 266                                   | 2016 | Sang <sup>181</sup>         |
|           |           | rs10483727   | POAG          | Saudi Arabia                           | C-C     | POAG: 92, C: 94                                     | 2018 | Kondkar <sup>182</sup>      |
|           |           | rs10483727   | POAG          | China, Japan                           | C-C     | POAG: 1440, C: 1313                                 | 2018 | Rong <sup>183</sup>         |
|           |           | rs4901977    | VCDR          | Cau, Asian                             | Meta    | (D) 21094 and 6784                                  | 2014 | Springelkamp <sup>75</sup>  |
|           |           | rs33912345   | POAG          | US, Australia, EU,<br>Singapore, China | Meta    | (D) POAG: 3853, C: 33480<br>(R) POAG: 3164, C: 9242 | 2016 | Bailey <sup>67</sup>        |
|           |           | rs33912345   | POAG, NTG     | China                                  | C-C     | POAG: 866, C: 266                                   | 2016 | Sang <sup>181</sup>         |
|           |           | rs33912345   | POAG          | Japan                                  | C-C     | POAG: 1172, C: 1559                                 | 2017 | Shiga <sup>121</sup>        |
|           |           | rs33912345   | POAG          | China, Japan                           | C-C     | POAG: 1440, C: 1313                                 | 2018 | Rong <sup>183</sup>         |
|           |           | rs8015152    | VCDR          | EU, Asian                              | Meta    | 37930                                               | 2017 | Springelkamp <sup>75</sup>  |
|           |           | rs8015152    | POAG          | Cau, Asian                             | Meta    | POAG: 6429, C: 41404                                | 2017 | Springelkamp <sup>75</sup>  |
|           |           | rs4436712    | CA            | EU, Asian                              | Meta    | 37930                                               | 2017 | Springelkamp <sup>75</sup>  |
|           |           | rs4436712    | POAG          | Cau, Asian                             | Meta    | POAG: 6429, C: 41404                                | 2017 | Springelkamp <sup>75</sup>  |
|           |           | rs34935520   | ODA           | EU, Asian                              | Meta    | 37930                                               | 2017 | Springelkamp <sup>75</sup>  |

Supplemental table 3: Continued

| Loci      | Gene           | Polymorphism | Trait     | Population    | Study | Size (n)                                            | Year | Reference                      |
|-----------|----------------|--------------|-----------|---------------|-------|-----------------------------------------------------|------|--------------------------------|
| 14p22-p23 | SIX1/SIX6      | rs34935520   | POAG      | Cau, Asian    | Meta  | POAG: 6429, C: 41404                                | 2017 | Springelkamp <sup>75</sup>     |
|           |                | rs34935520   | POAG      | Multi-ethnic  | GWAS  | (D) POAG: 7329 C: 169561<br>(R) POAG: 4986 C: 58426 | 2018 | Choquet <sup>69</sup>          |
|           |                | rs12436579   | POAG      | China, Japan  | C-C   | POAG: 1440, C: 1313                                 | 2018 | Rong <sup>183</sup>            |
|           |                | rs35155027   | POAG      | Multi-ethnic  | GWAS  | (D) POAG: 4986 C: 58426<br>(R) POAG: 7329 C: 169561 | 2018 | Choquet <sup>69</sup>          |
| 15q22.33  | SMAD3          | rs12913547   | CCT       | Cau, Asian    | Meta  | 20000                                               | 2013 | Lu <sup>74</sup>               |
|           |                | rs12912010   | CCT       | Europa        | Meta  | 17803                                               | 2018 | Iglesias                       |
|           |                | rs12912010   | CCT       | Asia          | Meta  | 8107                                                | 2018 | Iglesias                       |
|           |                | rs12912045   | IOP       | EU, Asia      | GWAS  | (D): 69756 (R): 37930                               | 2017 | Choquet <sup>68</sup>          |
| 2p21      | SRBD1          | rs3213787    | NTG       | Japan         | C-C   | NTG: 305, C: 355                                    | 2010 | Writing <sup>184</sup>         |
|           |                | rs3213787    | POAG, NTG | Japan         | C-C   | HTG: 212, NTG: 158, C: 191                          | 2011 | Mabuchi <sup>185</sup>         |
|           |                | rs3213787    | -         | Africa        | C-C   | POAG: 272, C: 165                                   | 2012 | Cao <sup>114</sup>             |
|           |                | rs11884064   | POAG      | UK            | GWAS  | (D) POAG: 387, C: 5380<br>(R) POAG: 294, C: 50      | 2012 | Gibson <sup>122</sup>          |
| 11q13.1   | SSSCA1         | rs1346       | VCDR      | Cau, Asian    | Meta  | (D) 21094 and 6784                                  | 2014 | Springelkamp <sup>75</sup>     |
|           |                | rs1346       | CA, VCDR  | EU, Asian     | Meta  | (D) 17248 and 6841                                  | 2015 | Springelkamp <sup>72</sup>     |
|           |                | rs1346       | VCDR, CA  | EU, Asian     | Meta  | 37930                                               | 2017 | Springelkamp <sup>75</sup>     |
| 3q22.3    | STAG1          | 3:136138073  | CCT       | Europa        | Meta  | 17803                                               | 2018 | Iglesias <sup>76</sup>         |
| 3q26.32   | TBL1XR1/KCNMB2 | rs7620503    | CCT       | Cau, Asian    | Meta  | 20000                                               | 2013 | Lu <sup>74</sup>               |
|           |                | 3:177298094  | CCT       | Europa        | Meta  | 17803                                               | 2018 | Iglesias <sup>76</sup>         |
|           |                | 3:177298094  | CCT       | Asia          | Meta  | 8107                                                | 2018 | Iglesias <sup>76</sup>         |
| 18q21.2   | TCF4           | rs11659764   | IOP       | EU, Asia      | GWAS  | (D): 69756 (R): 37930                               | 2017 | Choquet <sup>68</sup>          |
| 7q31.2    | TFEC-TES       | rs6968419    | IOP       | EU, Asia      | GWAS  | (D): 69756 (R): 37930                               | 2017 | Choquet <sup>68</sup>          |
| 3q25.31   | TIPARP         | rs9822953    | CCT       | Europa        | Meta  | 17803                                               | 2018 | Iglesias <sup>76</sup>         |
| 15q13     | TJP1           | rs785422     | CCT       | Cau, Asian    | Meta  | 20000                                               | 2013 | Lu <sup>74</sup>               |
|           |                | rs785420     | CCT       | Europa        | Meta  | 17803                                               | 2018 | Iglesias <sup>76</sup>         |
| 9q33.1    | TLR4           | rs2149356    | POAG, NTG | Japan         | C-C   | POAG: 184, NTG: 365, C: 216                         | 2012 | Takano <sup>186</sup>          |
|           |                | rs2149356    | POAG      | Mexico        | C-C   | POAG: 187, C: 109                                   | 2016 | Navarro-Partida <sup>187</sup> |
|           |                | rs7037117    | NTG       | Japan         | C-C   | NTG: 250, C: 318                                    | 2008 | Shibuya <sup>188</sup>         |
|           |                | rs7037117    | POAG, NTG | Japan         | C-C   | POAG: 184, NTG: 365, C: 216                         | 2012 | Takano <sup>186</sup>          |
|           |                | rs7037117    | POAG      | China         | C-C   | POAG: 462, C: 577                                   | 2012 | Chen <sup>176</sup>            |
|           |                | rs7037117    | -         | Africa        | C-C   | POAG: 272, C: 165                                   | 2012 | Cao <sup>114</sup>             |
|           |                | rs12377632   | POAG      | Mexico        | C-C   | POAG: 187, C: 109                                   | 2016 | Navarro-Partida <sup>187</sup> |
|           |                | rs1927911    | POAG      | Mexico        | C-C   | POAG: 187, C: 109                                   | 2016 | Navarro-Partida <sup>187</sup> |
|           |                | rs2149356    | POAG      | Mexico        | C-C   | POAG: 187, C: 109                                   | 2016 | Navarro-Partida <sup>187</sup> |
|           |                | rs4986790    | POAG      | Mexico        | C-C   | POAG: 187, C: 109                                   | 2017 | Navarro-Partida <sup>189</sup> |
|           |                | rs4986790    | -         | Saudi-Arabia  | C-C   | POAG: 85, C: 95                                     | 2016 | Abu-Amero <sup>190</sup>       |
|           |                | rs4986791    | POAG      | Mexico        | C-C   | POAG: 187, C: 109                                   | 2017 | Navarro-Partida <sup>189</sup> |
|           |                | rs4986791    | -         | Saudi-Arabia  | C-C   | POAG: 85, C: 95                                     | 2016 | Mousa <sup>191</sup>           |
|           |                | genewide     | -         | Korea         | C-C   | NTG: 147, C: 380                                    | 2011 | Suh <sup>192</sup>             |
|           |                | rs4656461    | POAG      | Australia, NZ | GWAS  | (D) POAG: 590, C: 3956<br>(R) POAG: 892, C: 4582    | 2011 | Burdon <sup>119</sup>          |

Supplemental table 3: Continued

| Loci     | Gene  | Polymorphism | Trait     | Population                             | Study | Size (n)                                            | Year | Reference                   |
|----------|-------|--------------|-----------|----------------------------------------|-------|-----------------------------------------------------|------|-----------------------------|
| 1q24     | TMCO1 | rs4656461    | POAG      | Chinese                                | C-C   | HTG: 870, NTG: 297, C: 934                          | 2015 | Chen <sup>193</sup>         |
|          |       | rs4656461    | IOP       | Asian, EU                              | Meta  | (D): 35296                                          | 2014 | Hysi <sup>65</sup>          |
|          |       | rs4656461    | POAG      | Cau                                    | Meta  | POAG: 4284, C: 95560                                | 2014 | Hysi <sup>65</sup>          |
|          |       | rs4656461    | POAG      | Spain                                  | C-C   | POAG: 391 C: 383                                    | 2017 | Zanon-Moreno <sup>107</sup> |
|          |       | rs4656461    | -         | Australia, NZ                          | Cases | 1420                                                | 2012 | Sharma <sup>194</sup>       |
|          |       | rs7518099    | POAG      | Australia, NZ                          | GWAS  | (D) POAG: 590, C: 3956<br>(R) POAG: 892, C: 4582    | 2011 | Burdon <sup>119</sup>       |
|          |       | rs7518099    | IOP       | Cau                                    | Meta  | POAG: 2647, C: 3589                                 | 2014 | Ozel <sup>195</sup>         |
|          |       | rs7518099    | POAG      | US, Australia, EU,<br>Singapore, China | Meta  | (D) POAG: 3853, C: 33480<br>(R) POAG: 3164, C: 9242 | 2016 | Bailey <sup>67</sup>        |
|          |       | rs7518099    | -         | UK                                     | GWAS  | (D) POAG: 387, C: 5380<br>(R) POAG: 294, C: 50      | 2012 | Gibson <sup>122</sup>       |
|          |       | rs7555523    | IOP       | NL, UK, Australia,<br>NZ               | GWAS  | (D) 11927, (R) 7482                                 | 2012 | Koolwijk van <sup>130</sup> |
|          |       | rs7555523    | POAG      | NL                                     | Meta  | POAG: 1432                                          | 2012 | Koolwijk van <sup>130</sup> |
|          |       | rs7555523    | IOP       | Asian, EU                              | Meta  | (D): 35296                                          | 2014 | Hysi <sup>65</sup>          |
|          |       | rs7555523    | POAG      | Cau                                    | Meta  | POAG: 4284, C: 95560                                | 2014 | Hysi <sup>65</sup>          |
|          |       | rs7555523    | POAG      | Chinese                                | C-C   | HTG: 870, NTG: 297, C: 934                          | 2015 | Chen <sup>193</sup>         |
|          |       | rs7555523    | -         | Saudi-Arabia                           | C-C   | POAG: 87, C: 94                                     | 2016 | Kondkar <sup>196</sup>      |
|          |       | rs10918274   | IOP       | Eu, Asian                              | Meta  | 37930                                               | 2017 | Springelkamp <sup>71</sup>  |
|          |       | rs7524755    | POAG, IOP | Multi-ethnic                           | GWAS  | (D) POAG: 4986 C: 58426<br>(R) POAG: 7329 C: 169561 | 2018 | Choquet <sup>69</sup>       |
|          |       | Rs2814471    | POAG      | Multi-ethnic                           | GWAS  | (D) POAG: 7329 C: 169561<br>(R) POAG: 4986 C: 58426 | 2018 | Choquet <sup>69</sup>       |
|          |       | rs1913845    | -         | Japan                                  | GWAS  | (D) POAG: 1394, C: 6599                             | 2012 | Osman <sup>110</sup>        |
|          |       | rs12723198   | -         |                                        |       | (R) POAG: 1802, C: 7212                             |      |                             |
|          |       | rs10918271   | -         |                                        |       |                                                     |      |                             |
|          |       | rs7411708    | -         |                                        |       |                                                     |      |                             |
| 12q21.31 | TMTC2 | Rs6668108    | IOP       | EU, Asia                               | GWAS  | (D): 69,756 (R): 37,930                             | 2017 | Croquet <sup>68</sup>       |
|          |       | rs7961953    | POAG      | Japan                                  | GWAS  | (D) POAG: 418, C:300<br>(R) POAG: 409, C 448        | 2009 | Nakano <sup>175</sup>       |
|          |       | rs7961953    | -         | China                                  | C-C   | POAG: 462, C: 577                                   | 2012 | Chen <sup>176</sup>         |
|          |       | rs7961953    | -         | Africa                                 | C-C   | POAG: 272, C: 165                                   | 2012 | Cao <sup>114</sup>          |
|          |       | rs7961953    | -         | Korea                                  | C-C   | POAG: 211, C: 904                                   | 2014 | Kim <sup>178</sup>          |
|          |       | rs7972528    | CA        | EU, Asian                              | Meta  | (D) 17248 and 6841                                  | 2015 | Springelkamp <sup>72</sup>  |
|          |       | rs1511589    | ODA       |                                        |       |                                                     |      |                             |
|          |       | rs10862688   | VCDR      | Cau, Asian                             | Meta  | (D) 21094 and 6784                                  | 2014 | Springelkamp <sup>75</sup>  |
|          |       | rs324780     | VCDR      | EU, Asian                              | Meta  | 37930                                               | 2017 | Springelkamp <sup>71</sup>  |
|          |       | rs482507     | CA        |                                        |       |                                                     |      |                             |
|          |       | rs442376     | ODA       |                                        |       |                                                     |      |                             |
|          |       | rs324794     | POAG      | Multi-ethnic                           | GWAS  | (D) POAG: 4986 C: 58426                             | 2018 | Choquet <sup>69</sup>       |
| 6p21.3   | TNF   | rs1800629    | POAG      | Turkey                                 | C-C   | POAG: 86, C: 193                                    | 2012 | Bozkurt <sup>197</sup>      |
|          |       | rs1800629    | POAG      | China                                  | C-C   | POAG: 60, C: 103                                    | 2003 | Lin <sup>198</sup>          |
|          |       | rs1800629    | POAG      | Iran                                   | C-C   | POAG: 223, C: 202                                   | 2009 | Razeghinejad <sup>199</sup> |
|          |       |              |           |                                        |       |                                                     |      |                             |

Supplemental table 3: Continued

| Loci        | Gene        | Polymorphism | Trait         | Population                          | Study  | Size (n)                                            | Year | Reference                  |
|-------------|-------------|--------------|---------------|-------------------------------------|--------|-----------------------------------------------------|------|----------------------------|
| 6p21.3      | TNF         | rs1800629    | POAG          | China                               | C-C    | HTG: 255, NTG: 100, C: 201                          | 2010 | Fan <sup>60</sup>          |
|             |             | rs1800629    | POAG          | Cau, Asian                          | Meta   | POAG: 1182, C: 3003                                 | 2013 | Xin <sup>200</sup>         |
|             |             | rs1800629    | POAG          | Egypt                               | C-C    | POAG: 60, C: 26                                     | 2016 | Hamid <sup>201</sup>       |
|             |             | rs1800629    | POAG          | Poland                              | C-C    | POAG: 252 C:191                                     | 2017 | Tikunova <sup>202</sup>    |
| 17p13.1     | TP53        | rs1800629    | -             | Australia                           | C-C    | POAG: 114, C: 228                                   | 2006 | Mossbock <sup>203</sup>    |
|             |             | rs1800629    | -             | Cau, Asian                          | Meta   | POAG: 1798, C: 1683                                 | 2015 | Lee <sup>204</sup>         |
|             |             | rs1800630    | POAG          | China                               | C-C    | POAG: 234, C: 230                                   | 2012 | Wang <sup>205</sup>        |
|             |             | rs4645836    | POAG          |                                     |        |                                                     |      |                            |
|             |             | rs361525     | -             | Australia                           | C-C    | POAG: 114, C: 228                                   | 2006 | Mossbock <sup>203</sup>    |
|             |             | rs361525     | -             | Cau, Asian                          | Meta   | POAG: 404, C: 625                                   | 2013 | Xin <sup>200</sup>         |
|             |             | rs361525     | -             | Eu, Turkey                          | Meta   | POAG: 404, C: 625                                   | 2015 | Lee <sup>204</sup>         |
|             |             | rs1799724    | -             | Cau, Asian                          | Meta   | POAG: 808, C: 1039                                  | 2013 | Xin <sup>200</sup>         |
|             |             | rs645836     | -             | Cau, Asian                          | Meta   | POAG: 645, C: 666                                   | 2013 | Xin <sup>200</sup>         |
|             |             | rs1042522    | POAG          | China                               | C-C    | HTG: 255, NTG: 100, C: 201                          | 2010 | Fan <sup>60</sup>          |
|             |             | rs1042522    | POAG          | Cau, Asian                          | C-C    | POAG: 1930, C: 1463                                 | 2012 | Guo <sup>206</sup>         |
|             |             | rs1042522    | RNFLT         | Cau                                 | C-C    | POAG: 186, C: 188                                   | 2014 | Nowak <sup>207</sup>       |
|             |             | rs1042522    | -             | Turkey                              | C-C    | POAG: 75, C: 119                                    | 2009 | Saglar <sup>87</sup>       |
|             |             | rs1042522    | -             | India                               | C-C    | POAG:139, C: 218                                    | 2018 | Gupta <sup>208</sup>       |
|             |             | rs1042522    | -             | Japan                               | C-C    | HTG: 212, NTG: 213, C: 189                          | 2012 | Mabuchi <sup>97</sup>      |
|             |             | rs57958982   | -             |                                     |        |                                                     |      |                            |
| 2p24.3      | TRIB2       | rs2113818    | CA,VCDR       | EU, Asian                           | Meta   | (D) 17248 and 6841                                  | 2015 | Springelkamp <sup>72</sup> |
|             |             | rs13016883   | CA            | EU, Asian                           | Meta   | 37930                                               | 2017 | Springelkamp <sup>71</sup> |
| 22q13.1     | TRIOBP      | rs1074407    | CA            | EU, Asian                           | Meta   | 37930                                               | 2017 | Springelkamp <sup>71</sup> |
| 22q11.21    | TXNRD2      | rs35934224   | POAG          | US, Australia, EU, Singapore, China | Meta   | (D) POAG: 3853, C: 33480<br>(R) POAG: 3164, C: 9242 | 2016 | Bailey <sup>67</sup>       |
|             |             | rs58714937   | POAG          | Multi-ethnic                        | GWAS   | (D) POAG: 7329 C: 169561                            | 2018 | Choquet <sup>69</sup>      |
| 4q26        | UGT8        | rs10021731   | ODA           | EU, Asian                           | Meta   | 37930                                               | 2017 | Springelkamp <sup>71</sup> |
| 1p31        | U6/ GADD45A | rs787541     | ODA           | EU, Asian                           | Meta   | 37930                                               | 2017 | Springelkamp <sup>71</sup> |
| 5q14.2-14.3 | VCAN        | rs7717697    | VCDR, CA, ODA | EU, Asian                           | Meta   | 37930                                               | 2017 | Springelkamp <sup>71</sup> |
| 3p25.2      | VGLL4       | rs2443724    | ODA           | EU, Asian                           | Meta   | 37930                                               | 2017 | Springelkamp <sup>71</sup> |
| 7q11.21     | VKORC1L1    | rs11763147   | CCT           | Cau, Asian                          | Meta   | 20000                                               | 2013 | Lu <sup>74</sup>           |
| 22q13       | WNT7B       | rs10453441   | CCT           | Latino                              | GWAS   | (D): 3584 (R): 931                                  | 2016 | Gao <sup>125</sup>         |
|             |             | rs9330813    | CCT           | India                               | GWAS   | (D): 159, (R): 8844                                 | 2018 | Fan <sup>209</sup>         |
|             |             |              |               | Latino, EU                          | + Meta | Total: 9003                                         |      |                            |
| 2q35        | WNT10A      | rs121908120  | CCT           | Europa                              | Meta   | 17803                                               | 2018 | Iglesias <sup>76</sup>     |
| 16q24       | ZNF469      | rs12447690   | CCT           | Croatia, Scotland                   | GWAS   | (D): 1445, (R): 824                                 | 2010 | Vitart <sup>77</sup>       |
|             |             | rs12447690   | CCT           | Australia, UK                       | GWAS   | (D): 5058                                           | 2010 | Lu <sup>210</sup>          |
|             |             | rs12447690   | CCT           | Singapore                           | GWAS   | (D): 5080                                           | 2011 | Vithana <sup>78</sup>      |
|             |             | rs12447690   | CCT           | Germany, NL                         | GWAS   | (D): 3931, (R): 1418                                | 2012 | Hoehn <sup>123</sup>       |
|             |             | rs12447690   | CCT           | Asian                               | GWAS   | (D): 7711, (R): 2681                                | 2012 | Cornes <sup>79</sup>       |
|             |             | rs12447690   | CCT, POAG     | US-Cau                              | GWAS   | (D): 1117, (D): 6470                                | 2012 | Ulmer <sup>80</sup>        |

Supplemental table 3: Continued

| Loci  | Gene   | Polymorphism | Trait | Population     | Study | Size (n)                                      | Year | Reference                  |
|-------|--------|--------------|-------|----------------|-------|-----------------------------------------------|------|----------------------------|
| 16q24 | ZNF469 | rs12447690   | CCT   | Latino         | GWAS  | (D): 3584 (R): 931                            | 2016 | Gao <sup>125</sup>         |
|       |        | rs12447690   | -     | Australia      | C-C   | POAG: 876, C: 883                             | 2012 | Dimasi <sup>113</sup>      |
|       |        | rs9938149    | CCT   | Australia, UK  | GWAS  | (D): 5058                                     | 2010 | Lu <sup>210</sup>          |
|       |        | rs9938149    | CCT   | Singapore      | GWAS  | (D): 5080                                     | 2011 | Vithana <sup>78</sup>      |
|       |        | rs9938149    | CCT   | Germany, NL    | GWAS  | (D): 3931, (R): 1418                          | 2012 | Hoehn <sup>123</sup>       |
|       |        | rs9938149    | CCT   | Cau, Asian     | Meta  | 20000                                         | 2013 | Lu <sup>74</sup>           |
|       |        | rs9938149    | CCT   | Norfolk Island | Cases | 330                                           | 2017 | Matovinovic <sup>179</sup> |
|       |        | rs9938149    | -     | Australia      | C-C   | POAG: 876, C: 883                             | 2012 | Dimasi <sup>113</sup>      |
|       |        | rs35193497   | CCT   | Europa         | Meta  | 17803                                         | 2018 | Iglesias <sup>76</sup>     |
|       |        | rs35193497   | CCT   | Asia           | Meta  | 8107                                          | 2018 | Iglesias <sup>76</sup>     |
|       |        | rs12926024   | IOP   | Multi-ethnic   | GWAS  | (D)69,756                                     | 2017 | Choquet <sup>68</sup>      |
|       |        | rs547984     | POAG  | Japan          | GWAS  | (D) POAG: 418, C:300<br>(R) POAG: 409, C: 448 | 2009 | Nakano <sup>175</sup>      |
|       |        | rs547984     | -     | Africa         | C-C   | POAG: 272, C: 165                             | 2012 | Cao <sup>114</sup>         |
| 1q43  | ZP4    | rs547984     | -     | Saudi-Arabia   | C-C   | POAG: 90, C: 95                               | 2017 | Azad <sup>211</sup>        |
|       |        | rs540782     | POAG  | Japan          | GWAS  | (D) POAG: 418, C:300<br>(R) POAG: 409, C 448  | 2009 | Nakano <sup>175</sup>      |
|       |        | rs540782     | -     | Saudi-Arabia   | C-C   | POAG: 92, C: 95                               | 2017 | Kondkar <sup>212</sup>     |
|       |        | rs693421     | POAG  | Japan          | GWAS  | (D) POAG: 418, C:300<br>(R) POAG: 409, C 448  | 2009 | Nakano <sup>175</sup>      |
|       |        | rs693421     | POAG  | Korea          | C-C   | POAG: 211, C: 904                             | 2014 | Kim <sup>178</sup>         |
|       |        | rs693421     | -     | China          | C-C   | POAG: 462, C: 577                             | 2012 | Chen <sup>176</sup>        |
|       |        | rs2499601    | POAG  | Japan          | GWAS  | (D) POAG: 418, C:300<br>(R) POAG: 409, C 448  | 2009 | Nakano <sup>175</sup>      |
|       |        |              |       |                |       |                                               |      |                            |

Abbreviations: CA= cup area; CCT= central corneal thickness; HTG= high tension glaucoma; NTG= normal tension glaucoma; IOP= intraocular pressure; ODA= optic disc area; POAG= primary open angle glaucoma; RNFLT= retina nerve fiber layer thickness; VCDR= vertical cup disc ratio; AA= African American, Cau= Caucasian; NL= Netherlands NZ= New Zealand; UK= United Kingdom; US= United States; C-C= case control; Meta= meta-analysis. (D)= Discover®(R)= Replication (-) indicates that no significant association between the gene and any of the glaucoma traits was observed.

Supplemental table 4: Less likely glaucoma risk genes

| Loci             | Gene          | Polymorphism                        | Trait                     | Population                       | Study             | Size (n)                                                    | Year                 | Reference                                                                    |
|------------------|---------------|-------------------------------------|---------------------------|----------------------------------|-------------------|-------------------------------------------------------------|----------------------|------------------------------------------------------------------------------|
| 7q21.12          | ABCB1         | rs2032582<br>rs1045642<br>rs1045642 | POAG<br>POAG<br>IOP       | China                            | C-C               | POAG: 129, C: 121                                           | 2016                 | Liu <sup>213</sup>                                                           |
| 15q26.3          | ADAMTS17      | rs72755233                          | IOP                       | Multi-ethnic                     | GWAS              | (D)69,756                                                   | 2017                 | Choquet <sup>68</sup>                                                        |
| 12q12            | ADAMTS20      | rs7977237                           | IOP                       | Multi-ethnic                     | GWAS              | (D)69,756                                                   | 2017                 | Choquet <sup>68</sup>                                                        |
| 10q25.3          | ADRB1         | rs1801253                           | NTG                       | Japan                            | C-C               | HTG: 211, NTG: 294, C: 240                                  | 2006                 | Inagaki <sup>214</sup>                                                       |
| 5q32             | ADRB2         | rs1042713<br>rs1042714              | POAG<br>IOP               | Japan                            | C-C               | HTG: 211, NTG: 294, C: 240                                  | 2006                 | Inagaki <sup>214</sup>                                                       |
| Xq23             | AGTR2         | rs11091046<br>rs11091046            | NTG<br>-                  | Japan<br>Mexico                  | C-C<br>C-C        | HTG: 190, NTG: 268, C: 240<br>POAG: 118, C: 100             | 2005<br>2013         | Hashizume <sup>215</sup><br>Buentello-Volante <sup>216</sup>                 |
| 8q23.1           | ANGPT1        | rs2514884<br>rs10105844             | POAG<br>IOP               | Multi-ethnic<br>Multi-ethnic     | GWAS<br>GWAS      | (D) POAG: 7329 C: 169561<br>(D)69756                        | 2018<br>2017         | Choquet <sup>69</sup><br>Choquet <sup>68</sup>                               |
| 5p15.2           | ANKH          | rs76325372                          | POAG                      | Multi-ethnic                     | GWAS              | (D) POAG: 7329 C: 169561                                    | 2018                 | Choquet <sup>69</sup>                                                        |
| 14q11.2          | APEX1         | rs1130409                           | POAG                      | Poland                           | C-C               | POAG: 150, C: 190                                           | 2013                 | Cuchra <sup>217</sup>                                                        |
| 13q12.12         | BASP1P1       | rs9552680                           | IOP                       | Multi-ethnic                     | GWAS              | (D)69,756                                                   | 2017                 | Choquet <sup>68</sup>                                                        |
| 11p14.1          | BDNF          | rs6265<br>rs2030324                 | RNFLT, POAG<br>POAG, VCDR | Cau<br>Poland                    | C-C<br>C-C        | POAG: 167, C: 193<br>POAG: 363, C: 406                      | 2014<br>2015         | Nowak <sup>218</sup><br>Nowak <sup>90</sup>                                  |
| 2p22.3           | BIRC6         | rs2754511<br>rs2754511              | POAG<br>-                 | US-Cau<br>Pakistan               | C-C<br>C-C        | POAG: 678, C: 421<br>POAG: 471, C: 160                      | 2011<br>2014         | Carbone <sup>219</sup><br>Ayub <sup>220</sup>                                |
| 6p22.2           | BTN3A2        | rs4712981<br>rs853676               | CCT<br>ODA                | Norfolk Island<br>Norfolk Island | Cases<br>Cases    | 330<br>330                                                  | 2018<br>2018         | Kho <sup>221</sup><br>Kho <sup>221</sup>                                     |
| 11p13            | CAT           | rs769217<br>rs1001179<br>rs1001179  | POAG<br>POAG<br>-         | China<br>Poland<br>Saudi Arabia  | C-C<br>C-C<br>C-C | POAG: 416; C: 997<br>POAG: 209; C: 191<br>POAG: 225; C: 403 | 2017<br>2016<br>2013 | Gong<br>Malinowska<br>Abu-Amoro                                              |
| 3p12.1           | CADM2         | Rs34201102                          | POAG                      | Multi-ethnic                     | GWAS              | (D) POAG: 7329 C: 169561                                    | 2018                 | Choquet <sup>69</sup>                                                        |
| 1p13.1           | CD2           | c.596A > G                          | POAG                      | China                            | Cases             | 3                                                           | 2014                 | Liu <sup>222</sup>                                                           |
| 16q22.1          | CDH1          | rs1801026<br>rs1801026              | POAG<br>-                 | China<br>China                   | C-C<br>C-C        | POAG: 60, C: 103<br>HTG: 255, NTG: 100, C: 201              | 2006<br>2010         | Lin <sup>223</sup><br>Fan <sup>60</sup>                                      |
| 9p21.3           | CDKN2A        | rs3088440                           | POAG                      | Spain                            | C-C               | POAG: 391 C: 383                                            | 2017                 | Zanon-Moreno <sup>107</sup>                                                  |
| 3p26.3-<br>p26.2 | CNTN4         | copy number                         | POAG                      | Indian, Cau                      | C-C               | POAG: 971, C: 749                                           | 2014                 | Kaurani <sup>224</sup>                                                       |
| MtDNA            | mt-CO1        | rs879053914                         | POAG                      | African American                 | C-C               | POAG: 1339, C: 850                                          | 2018                 | Collins <sup>225</sup>                                                       |
| mtDNA            | mt-CO3        | rs2248727                           | NTG                       | Korea                            | C-C               | NTG: 196; C: 202                                            | 2014                 | Jeoung <sup>226</sup>                                                        |
| 21q22.3          | COL6A1/COL6A2 | rs2839082                           | IOP                       | Multi-ethnic                     | GWAS              | (D)69,756                                                   | 2017                 | Choquet <sup>68</sup>                                                        |
| 2q37.3           | COL6A3        | rs7599762                           | IOP                       | Multi-ethnic                     | GWAS              | (D)69,756                                                   | 2017                 | Choquet <sup>68</sup>                                                        |
| 21q22.3          | COL18A1       | rs144147445                         | POAG                      | Cau, AA                          | C-C               | 15 families                                                 | 2013                 | Wiggs <sup>37</sup>                                                          |
| 15q24.1          | CYP1A1        | rs4646903                           | POAG                      | Brazil                           | C-C               | POAG: 152, C: 100                                           | 2014                 | Costa <sup>227</sup>                                                         |
| 14q32.1          | CYP46A1       | rs754203<br>rs754203<br>rs754203    | POAG<br>POAG<br>-         | France<br>India<br>Australia     | C-C<br>C-C<br>C-C | POAG: 150, C: 118<br>POAG: 122, C: 112<br>POAG: 330, C: 251 | 2009<br>2016<br>2011 | Fourgeux <sup>228</sup><br>Chandra <sup>229</sup><br>Mossbock <sup>230</sup> |
| mtDNA            | mt-CYB        | m.14766C>T                          | NTG                       | Korea                            | C-C               | NTG: 196; C: 202                                            | 2014                 | Jeoung <sup>226</sup>                                                        |
| 3p22.2           | DCLK3         | rs17197692                          | RNFLT                     | NL                               | Linkage           | 23000                                                       | 2011                 | Axenovich <sup>94</sup>                                                      |
| 11q14.1          | DLG2          | rs790357                            | IOP                       | Norfolk island                   | Cases             | Population: 330                                             | 2017                 | Matovinovic <sup>179</sup>                                                   |

Supplemental Table 4: Continued

| Loci    | Gene        | Polymorphism          | Trait     | Population    | Study | Size (n)                   | Year | Reference                        |
|---------|-------------|-----------------------|-----------|---------------|-------|----------------------------|------|----------------------------------|
| 4q31.22 | EDNRA       | rs5335                | POAG      | Japan         | C-C   | HTG: 176, NTG: 250, C:224  | 2005 | Ishikawa <sup>231</sup>          |
|         |             | rs5335                | POAG      | Mexico        | C-C   | POAG: 118, C: 100          | 2013 | Buentello-Volante <sup>216</sup> |
| 7q11.23 | ELN         | rs149154973           | POAG      | Multi-ethnic  | GWAS  | (D) POAG: 4986 C: 58426    | 2018 | Choquet <sup>69</sup>            |
| 6p12.1  | ELOVL5      | rs735860              | NTG, POAG | Japan         | C-C   | NTG: 305, C: 355           | 2010 | Writing <sup>184</sup>           |
|         |             | rs735860              | POAG      | Japan         | C-C   | HTG: 212, NTG: 158, C: 191 | 2011 | Mabuchi <sup>185</sup>           |
|         |             | rs735860              | NTG, POAG | Japan         | C-C   | HTG: 212, NTG: 213, C: 191 | 2015 | Mabuchi <sup>232</sup>           |
| 14q23.3 | ESR2        | rs1256031             | POAG, IOP | Japan         | C-C   | HTG: 212, NTG: 213, C: 191 | 2010 | Mabuchi <sup>233</sup>           |
|         |             | rs4986938             | POAG      |               |       |                            |      |                                  |
| 15q21.1 | FBN1        | rs17352842            | CCT       | Australia-Cau | PC    | 956                        | 2010 | Dimasi <sup>111</sup>            |
| 14q31.3 | GALC        | Heterozygous deletion | POAG      | Cau           | C-C   | POAG: 1030, C: 2330        | 2011 | Liu <sup>234</sup>               |
|         |             | Heterozygous deletion | -         | Korea         | C-C   | NTG: 276, C: 135           | 2016 | Shin <sup>235</sup>              |
| 9p24.2  | GLIS3       | rs2224492             | IOP       | Multi-ethnic  | GWAS  | (D)69,756                  | 2017 | Choquet <sup>68</sup>            |
| 7q35-36 | GPDS1       | D7S2462               | NTG       | Japan         | C-C   | NTG: 141, C: 101           | 2009 | Nakamura <sup>236</sup>          |
| 10p12.1 | GPR158      | rs11014632            | IOP       | Multi-ethnic  | GWAS  | (D)69,756                  | 2017 | Choquet <sup>68</sup>            |
| 3p21.31 | GPX1        | rs1050450             | POAG      | Poland        | C-C   | POAG: 209; C: 191          | 2016 | Malinowska <sup>237</sup>        |
| 22q11.2 | GSTT1       | null genotype         | POAG      | Turkey        | C-C   | POAG: 144, C: 121          | 2007 | Unal <sup>141</sup>              |
|         |             | null genotype         | POAG      | Brazil        | C-C   | POAG: 100, C: 53           | 2014 | Silva <sup>238</sup>             |
|         |             | active                | POAG      | Serbia        | C-C   | POAG: 102, C:202           | 2018 | Stamenkovic <sup>139</sup>       |
|         |             | null genotype         | -         | Cau, Asian    | Meta  | POAG: 1306, C: 1114        | 2013 | Lu <sup>239</sup>                |
|         |             | null genotype         | -         | Cau, Asian    | meta  | POAG: 1591 C: 1337         | 2017 | Malik <sup>142</sup>             |
| 17p13.3 | HABP1       | rs1805429             | POAG      | India         | C-C   | HTG: 116, NTG: 321, C: 96  | 2012 | Basu <sup>240</sup>              |
|         |             | rs2472614             | POAG      |               |       |                            |      |                                  |
|         |             | rs8072363             | POAG      |               |       |                            |      |                                  |
| mtDNA   | Haplogroups | non-L3 haplotype      | POAG      | African       | C-C   | POAG: 1919, C: 2162        | 2018 | Gudiseva <sup>225</sup>          |
| 8q24.12 | HAS2        | rs6651224             | POAG      | India         | C-C   | HTG: 116, NTG: 321, C: 96  | 2012 | Basu <sup>240</sup>              |
| 2p12    | HK2         | rs678350              | POAG, NTG | Japan         | C-C   | HTG: 310, NTG: 407, C: 391 | 2013 | Shi <sup>241</sup>               |
| 6p21.3  | HSP70-1     | rs1008438             | POAG      | Japan         | C-C   | HTG: 211, NTG: 290, C: 241 | 2007 | Tosaka <sup>242</sup>            |
|         | HSP70       | rs1043618             | -         | Pakistan      | C-C   | POAG: 159, C: 166          | 2010 | Ayub <sup>151</sup>              |
|         |             | rs1043618             | POAG      | Cau           | C-C   | POAG: 167, C: 193          | 2014 | Nowak <sup>218</sup>             |
|         |             | rs1043618             | RFNLT     | Poland        | C-C   | POAG: 363, C: 406          | 2015 | Nowak <sup>90</sup>              |
| 1p34.2  | HIVEP3      | rs1866758             | IOP       | Multi-ethnic  | GWAS  | (D)69,756                  | 2017 | Choquet <sup>68</sup>            |
| 3p21.3  | HYAL3       | rs2285044             | POAG      | India         | C-C   | HTG: 116, NTG: 321, C: 96  | 2012 | Basu <sup>240</sup>              |
|         |             | rs3774753             | POAG      |               |       |                            |      |                                  |
|         |             | rs1310073             | POAG      |               |       |                            |      |                                  |
|         |             | rs1076872             | POAG      |               |       |                            |      |                                  |
| 11p15.5 | IGF2        | rs680                 | POAG      | China         | C-C   | POAG: 60, C: 104           | 2003 | Tsai <sup>243</sup>              |
| 2q34    | IKZF2       | rs56335522            | POAG      | Multi-ethnic  | GWAS  | (D) POAG: 7329 C: 169561   | 2018 | Choquet <sup>69</sup>            |
| 2q14    | IL1A        | rs1800587             | POAG      | China         | C-C   | POAG: 156, C: 167          | 2006 | Wang <sup>244</sup>              |
|         |             | rs1800587             | -         | China         | C-C   | POAG 194, C: 79            | 2007 | How <sup>245</sup>               |
|         |             | rs1800587             | NTG       | India         | C-C   | HTG: 116, NTG: 199, C: 301 | 2010 | Mookherjee <sup>28</sup>         |

Supplemental table 4: Continued

| Loci    | Gene         | Polymorphism | Trait | Population     | Study | Size (n)                   | Year | Reference                        |
|---------|--------------|--------------|-------|----------------|-------|----------------------------|------|----------------------------------|
| 2q14    | IL1A         | rs1800587    | -     | Asian          | Meta  | POAG: 822 , C: 714         | 2017 | Li <a href="#">246</a>           |
|         |              | rs1800587    | -     | Brazil         | C-C   | POAG: 214, C:187           | 2018 | Oliveira <a href="#">247</a>     |
|         |              | rs17561      | -     |                |       |                            |      |                                  |
| 2q14    | IL1B         | rs16944      | POAG  | India          | C-C   | HTG: 116, NTG: 199, C: 301 | 2010 | Mookherjee <a href="#">28</a>    |
|         |              | rs16944      | POAG  | Cau            | C-C   | POAG: 255, C: 256          | 2013 | Markiewicz <a href="#">144</a>   |
|         |              | rs16944      | -     | China          | C-C   | POAG: 60, C:103            | 2003 | Lin <a href="#">198</a>          |
|         |              | rs16944      | -     | Asian/Cau      | Meta  | POAG:1053, C:986           | 2017 | Li <a href="#">246</a>           |
|         |              | rs1143634    | -     |                |       |                            |      |                                  |
|         |              | rs1143634    | -     | China          | C-C   | POAG 194, C: 79            | 2007 | How <a href="#">245</a>          |
|         |              | rs1143634    | POAG  | Brazil         | C-C   | POAG: 214, C:187           | 2018 | Oliveira <a href="#">247</a>     |
|         |              | rs16944      | POAG  |                |       |                            |      |                                  |
|         |              | rs1134627    | -     |                |       |                            |      |                                  |
| 17p13.2 | INCA1        | rs34629349   | IOP   | Multi-ethnic   | GWAS  | (D)69,756                  | 2017 | Choquet <a href="#">68</a>       |
| 9p23    | LINC00583    | rs1831902    | IOP   | Multi-ethnic   | GWAS  | (D)69,756                  | 2017 | Choquet <a href="#">68</a>       |
| 20q12   | LINC01734    | rs3918508    | IOP   | Multi-ethnic   | GWAS  | (D)69,756                  | 2017 | Choquet <a href="#">68</a>       |
| 9q33.3  | LMX1B        | rs7859156    | POAG  | UK             | C-C   | HTG: 272, NTG: 37, C: 276  | 2009 | Park <a href="#">248</a>         |
|         |              | rs7854658    | NTG   |                |       |                            |      |                                  |
|         |              | rs55770306   | POAG  | Multi-ethnic   | GWAS  | (D) POAG: 7329 C: 169561   | 2018 | Choquet <a href="#">69</a>       |
| 15q24.1 | LOXL1        | rs1048661    | POAG  | Cau, Asain     | Meta  | POAG: 2611, C: 2682        | 2015 | Wu <a href="#">249</a>           |
|         |              | rs3825942    | POAG  |                |       |                            |      |                                  |
|         |              | rs2165241    | POAG  |                |       |                            |      |                                  |
|         |              | rs2165241    | POAG  | Spain          | C-C   | POAG: 329, C: 329          | 2015 | Zanon-Moreno <a href="#">250</a> |
|         |              | rs2165241    | -     | Cau, Asian     | Meta  | POAG: 2098, C: 16473       | 2014 | Sun <a href="#">251</a>          |
|         |              | rs1048661    | -     | Greece         | C-C   | POAG: 66, C: 93            | 2014 | Anastapoulos <a href="#">252</a> |
|         |              | rs1048661    | -     | Cau, Asian     | Meta  | POAG: 1795, C: 2916        | 2014 | Sun <a href="#">251</a>          |
|         |              | rs1048661    | -     | Cau, Asian     | Meta  | POAG: 2223, C: 16664       | 2010 | Chen <a href="#">253</a>         |
|         |              | rs1048661    | -     | Turkey         | C-C   | POAG: 100, C: 100          | 2013 | Kasim <a href="#">254</a>        |
|         |              | rs1048661    | -     | Greece         | C-C   | POAG: 52, C: 107           | 2013 | Chiras <a href="#">91</a>        |
|         |              | rs3825942    | -     |                |       |                            |      |                                  |
|         |              | rs3825942    | -     | Greece         | C-C   | POAG: 66, C: 93            | 2014 | Anastapoulos <a href="#">252</a> |
|         |              | rs3825942    | -     | Cau, Asian     | Meta  | POAG: 2456, C: 2846        | 2014 | Sun <a href="#">251</a>          |
|         |              | rs3825942    | -     | Cau, Asian     | Meta  | POAG: 2223, C: 16664       | 2010 | Chen <a href="#">253</a>         |
|         |              | rs3825942    | -     | Turkey         | C-C   | POAG: 100, C: 100          | 2013 | Kasim <a href="#">254</a>        |
|         |              | rs13076750   | IOP   | Multi-ethnic   | GWAS  | (D)69,756                  | 2017 | Choquet <a href="#">68</a>       |
| 8q22    | LRP12/ZFPM12 | rs284489     | NTG   | Cau            | Meta  | NTG: 720, C: 3443          | 2012 | Wiggs <a href="#">120</a>        |
| 16q12.2 | LPCAT2       | rs1502007    | ODA   | Norfolk Island | Cases | 330                        | 2018 | Kho <a href="#">221</a>          |
| 3q26.33 | MFN1         | rs2111534    | NTG   | Germany        | C-C   | POAG: 285, C:282           | 2009 | Wolf <a href="#">59</a>          |
| 1p36.22 | MFN2         | rs873458     | NTG   | Germany        | C-C   | POAG: 285, C:282           | 2009 | Wolf <a href="#">59</a>          |
|         |              | rs2295281    | NTG   | Germany        |       |                            |      |                                  |
|         |              | rs7916852    | POAG  | India          | C-C   | POAG: 746, C: 697          | 2016 | Vishal <a href="#">255</a>       |
| 11q22.2 | MPP7         | rs10763643   | POAG  |                |       |                            |      |                                  |
|         |              | rs10763644   | POAG  |                |       |                            |      |                                  |

Supplemental table 4: Continued

| Loci     | Gene          | Polymorphism          | Trait      | Population          | Study   | Size (n)                                                       | Year | Reference                         |
|----------|---------------|-----------------------|------------|---------------------|---------|----------------------------------------------------------------|------|-----------------------------------|
| 16q12.2  | MMP2          | rs9923304<br>rs243865 | ODA<br>ODA | Poland              | C-C     | POAG: 271, C: 281                                              | 2013 | Kaminska <sup>256</sup>           |
| 11q22.2  | MMP12         | rs2276109             | ODA        | Cau                 | C-C     | POAG: 255, C: 256                                              | 2013 | Markiewicz <sup>144</sup>         |
| 11q13.1  | MIR612        | rs12803915            | VCDR, CA   | EU, Asain           | GWAS    | 37930                                                          | 2017 | Ghanbari <sup>257</sup>           |
| 20q13.33 | MIR3196       | rs113297757           | POAG       | Greece              | C-C     | POAG: 40, C:188                                                | 2018 | Chatzikyriakidou <sup>258</sup>   |
| 14q11.2  | MIR4707       | rs2273626             | VCDR, CA   | EU, Asian           | meta    | 37930                                                          | 2017 | Ghanbari <sup>257</sup>           |
| 1p36.22  | MTHFR         | rs1801133             | POAG       | Germany             | C-C     | POAG: 76, C: 71                                                | 2005 | Jünemann <sup>259</sup>           |
|          |               | rs1801133             | POAG       | India               | C-C     | POAG: 144, C: 173                                              | 2014 | Gupta <sup>260</sup>              |
|          |               | rs1801133             | POAG       | Saudi Arabia        | C-C     | POAG: 210, C: 280                                              | 2016 | Al-Shahrani <sup>261</sup>        |
|          |               | rs1801133             | -          | Cau, Asian, Mexican | Meta    | POAG: 1970, C: 1712                                            | 2015 | Zhao <sup>262</sup>               |
| mtDNA    | MT-ND2        | m.4883C>T             | NTG        | Korea               | C-C     | NTG: 196; C: 202                                               | 2014 | Jeoung <sup>226</sup>             |
| mtDNA    | MT-ND5        | m.12359C>G            | POAG       | Saudi Arabia        | C-C     | POAG: 27, C: 159                                               | 2006 | Abu-Amro <sup>263</sup>           |
|          |               | 17 variants           | POAG       | India               | C-C     | POAG: 101, C: 71                                               | 2013 | Banerjee <sup>264</sup>           |
|          |               | 4 variants            | POAG       | India, Ireland      | C-C     | POAG: 32, C: 110                                               | 2015 | Sundaresan <sup>265</sup>         |
| 2cen-q13 | NCK2          | D2S176 marker         | NTG        | Japan               | C-C     | POAG: 143, C: 103                                              | 2008 | Akiyama <sup>266</sup>            |
|          |               | rs2033008             | NTG        | Japan               | C-C     | HTG: 310, NTG: 407, C: 391                                     | 2013 | Shi <sup>241</sup>                |
| 19p13.2  | OLFM2         | c.431G→A              | POAG       | Japan               | C-C     | HTG: 215, NTG: 277, C: 240                                     | 2006 | Funayama <sup>267</sup>           |
| 1q31     | OPTC          | rs553656496           | POAG       | India               | C-C     | POAG: 200, C: 100                                              | 2007 | Acharya <sup>268</sup>            |
|          |               | c.382T > C            | POAG       |                     |         |                                                                |      |                                   |
|          |               | rs559635109           | POAG       |                     |         |                                                                |      |                                   |
|          |               | Mutations             | -          | India               | C-C     | HTG: 198, NTG: 53, C: 100                                      | 2007 | Kumar <sup>53</sup>               |
| 20p13    | PANK2/RNF24   | rs6037744             | VCDR       | NL                  | Linkage | 23000                                                          | 2011 | Axenovich <sup>94</sup>           |
| 3q27.1   | PARL          | rs1000002             | NTG        | Germany             | C-C     | POAG: 285, C:282                                               | 2009 | Wolf <sup>59</sup>                |
|          |               | rs1402003             | NTG        |                     |         |                                                                |      |                                   |
| 6q23.3   | PDE7B         | rs9494457             | POAG, IOP  | Multi-ethnic        | GWAS    | (D) POAG: 4986 C: 58426                                        | 2018 | Choquet <sup>69</sup>             |
| 3q21.1   | PDIA5         | rs11720822            | POAG       | US-Cau              | C-C     | POAG: 678, C: 421                                              | 2011 | Carbone <sup>219</sup>            |
|          |               | rs2241962             | POAG       |                     |         |                                                                |      |                                   |
| 4q25     | PITX2-C4ORF32 | Rs17527016            | IOP        | Multi-ethnic        | GWAS    | (D)69,756                                                      | 2017 | Choquet <sup>68</sup>             |
| 6p12.2   | PKHD1         | rs1396046             | IOP        | Multi-ethnic        | GWAS    | (D)69,756                                                      | 2017 | Choquet <sup>68</sup>             |
| 3p25.2   | PPARG         | rs1801282             | POAG       | India               | C-C     | POAG: 122, C: 112                                              | 2016 | Chandra <sup>229</sup>            |
| 7q21.3   | PON1          | rs3917594             | IOP        | Japan               | C-C     | POAG: 555, C: 284                                              | 2006 | Inagaki <sup>269</sup>            |
|          |               | rs662                 | POAG       | China               | C-C     | POAG: 37, C: 100                                               | 2010 | Zhou <sup>270</sup>               |
| 9q33.3   | PSMB7         | rs479398              | POAG       | US-Cau              | C-C     | POAG: 207, C: 270                                              | 2011 | Carbone <sup>219</sup>            |
| 5q21.2   | RAB9BP1       | copy number           | IOP        | EU, AU              | GWAS    | (D) 992; (R): 2087                                             | 2013 | Nag <sup>271</sup>                |
| 6q21     | RFPL4B        | rs141917145           | IOP        | Multi-ethnic        | GWAS    | (D)69,756                                                      | 2017 | Choquet <sup>68</sup>             |
| 3p21.3   | RHOA          | rs974495              | POAG       | Turkey              | C-C     | POAG: 179, C: 182                                              | 2016 | Saracaloglu <sup>272</sup>        |
| 14q11.2  | RPGRIP1       | 20 variants           | NTG, POAG  | Germany             | C-C     | (D) HTG: 270, NTG: 82, C: 376<br>(R) HTG: 79, NTG: 304, C: 104 | 2011 | Fernandez-Martinez <sup>273</sup> |
| 12q13.2  | RPS26         | rs10876864            | ODA        | Norfolk Island      | Cases   | 330                                                            | 2018 | Kho <sup>221</sup>                |
| 22q13.2  | RRP7A         | rs4822136             | IOP        | Norfolk Island      | Cases   | 330                                                            | 2018 | Kho <sup>221</sup>                |
| 3q25.1   | TSC22D2       | rs11710845            | IOP        | Multi-ethnic        | GWAS    | (D)69,756                                                      | 2017 | Choquet <sup>68</sup>             |
| 22q12.2  | SEC14L2/TAP   | rs737723              | POAG       | Mediterranean       | C-C     | POAG: 250, C: 250                                              | 2013 | Zanon-Moreno <sup>274</sup>       |
| 7q21.11  | SEMA3C-HGF    | rs1509922             | IOP        | Multi-ethnic        | GWAS    | (D)69,756                                                      | 2017 | Choquet <sup>68</sup>             |

Supplemental table 4: Continued

| Loci     | Gene    | Polymorphism            | Trait                  | Population    | Study   | Size (n)                   | Year | Reference                   |
|----------|---------|-------------------------|------------------------|---------------|---------|----------------------------|------|-----------------------------|
| 20p13    | SIRPA   | rs6034909               | VCDR                   | NL            | Linkage | 23000                      | 2011 | Axenovich <sup>94</sup>     |
| 20p13    | SLC23A2 | rs1279683               | POAG                   | Mediterranean | C-C     | POAG: 250, C: 250          | 2013 | Zanon-Moreno <sup>274</sup> |
| 17p13.3  | SMG6    | rs4790881               | IOP                    | Multi-ethnic  | GWAS    | (D)69,756                  | 2017 | Choquet <sup>68</sup>       |
| 15q21.3  | TCF12   | rs2593221               | POAG                   | Multi-ethnic  | GWAS    | (D) POAG: 4986 C: 58426    | 2018 | Choquet <sup>69</sup>       |
| 7p21.3   | THSD7A  | rs12699251              | POAG                   | Multi-ethnic  | GWAS    | (D) POAG: 7329 C: 169561   | 2018 | Choquet <sup>69</sup>       |
| 12q23.3  | TMEM119 | rs74481774              | IOP                    | Multi-ethnic  | GWAS    | (D)69,756                  | 2017 | Choquet <sup>68</sup>       |
| 11q23.3  | TMEM136 | rs12806740              | POAG                   | Multi-ethnic  | GWAS    | (D) POAG: 7329 C: 169561   | 2018 | Choquet <sup>69</sup>       |
| 2q11.2   | TMEM182 | rs869833                | POAG                   | Japan         | C-C     | HTG: 310, NTG: 407, C: 391 | 2013 | Shi <sup>241</sup>          |
| 2q35     | TNS1    | rs1035673               | IOP                    | Multi-ethnic  | GWAS    | (D)69,756                  | 2017 | Choquet <sup>68</sup>       |
| 9q34.2   | VAV2    | rs2156323               | POAG                   | Japan         | C-C     | POAG: 100, C: 100          | 2010 | Fujikawa <sup>275</sup>     |
| 1p13.3   | VAV3    | rs2801219               | POAG                   | Japan         | C-C     | POAG: 100, C: 100          | 2010 | Fujikawa <sup>275</sup>     |
| 12q13.11 | VDR     | rs1544410               | POAG                   | China         | C-C     | POAG: 73, C: 71            | 2016 | Ly <sup>276</sup>           |
|          |         | rs731236                | POAG                   |               |         |                            |      |                             |
| 6p12     | VEGF    | - 460 gene polymorphism | POAG                   | China         | C-C     | POAG: 60, C: 78            | 2014 | Lin <sup>277</sup>          |
| 19q13.31 | XRCC1   | rs25487                 | POAG                   | Pakistan      | C-C     | POAG: 160, C: 193          | 2011 | Yousaf <sup>278</sup>       |
|          |         | rs25487                 | POAG, VCDR, ODA, RNFLT | Poland        | C-C     | POAG: 170, C: 193          | 2013 | Szaflik <sup>279</sup>      |
|          |         | rs25487                 | POAG                   | Poland        | C-C     | POAG: 412, C: 454          | 2015 | Cuchra <sup>280</sup>       |
|          |         | rs25487                 | -                      | Turkey        | C-C     | POAG: 144 , C: 121         | 2007 | Güven <sup>281</sup>        |
| 19q13.32 | XPD     | rs13181                 | POAG                   | Pakistan      | C-C     | POAG: 160, C: 193          | 2011 | Yousaf <sup>278</sup>       |
|          |         | rs13181                 | -                      | Turkey        | C-C     | POAG: 144 , C: 121         | 2007 | Güven <sup>281</sup>        |

Abbreviations: CCT= central corneal thickness; NTG= normal tension glaucoma; IOP= intraocular pressure; ODA= optic disc area; POAG= primary open angle glaucoma; RNFLT= retina nerve fiber layer thickness; VCDR= vertical cup disc ratio; AA= African American, Cau= Caucasian; NL= Netherlands; UK= United Kingdom; US= United States; C-C= case control; Meta= meta-analysis. (-) indicates that no significant association between the gene and any of the glaucoma traits was observe

### Supplemental References

1. Sheffield VC, Stone EM, Alward WL, Drack AV, Johnson AT, Streb LM, Nichols BE. Genetic linkage of familial open angle glaucoma to chromosome 1q21-q31. *Nat Genet.* 1993;4(1):47-50
2. Stone EM, Fingert JH, Alward WL, Nguyen TD, Polansky JR, Sunden SL, Nishimura D, Clark AF, Nystuen A, Nichols BE, et al. Identification of a gene that causes primary open angle glaucoma. *Science.* 1997;275(5300):668-70
3. Fingert JH, Heon E, Liebmann JM, Yamamoto T, Craig JE, Rait J, Kawase K, Hoh ST, Buys YM, Dickinson J, et al. Analysis of myocilin mutations in 1703 glaucoma patients from five different populations. *Hum Mol Genet.* 1999;8(5):899-905
4. Hewitt AW, Mackey DA, Craig JE. Myocilin allele-specific glaucoma phenotype database. *Hum Mutat.* 2008;29(2):207-11
5. Stoilova D, Child A, Trifan OC, Crick RP, Coakes RL, Sarfarazi M. Localization of a locus (GLC1B) for adult-onset primary open angle glaucoma to the 2cen-q13 region. *Genomics.* 1996;36(1):142-50
6. Charlesworth JC, Stankovich JM, Mackey DA, Craig JE, Haybittel M, Westmore RN, Sale MM. Confirmation of the adult-onset primary open angle glaucoma locus GLC1B at 2cen-q13 in an Australian family. *Ophthalmologica.* 2006;220(1):23-30
7. Allingham RR, Wiggs JL, Damji KF, Herndon L, Youn J, Tallett DA, Jones KH, Del Bono EA, Reardon M, Haines JL, et al. Adult-onset primary open angle glaucoma does not localize to chromosome 2cen-q13 in North American families. *Hum Hered.* 1998;48(5):251-5
8. Wirtz MK, Samples JR, Kramer PL, Rust K, Topinka JR, Yount J, Koler RD, Acott TS. Mapping a gene for adult-onset primary open-angle glaucoma to chromosome 3q. *Am J Hum Genet.* 1997;60(2):296-304
9. Samples JR, Kitsos G, Economou-Petersen E, Steinkamp P, Sykes R, Rust K, Patzer C, Grigoriadou M, Aperis G, Psilas K, et al. Refining the primary open-angle glaucoma GLC1C region on chromosome 3 by haplotype analysis. *Clin Genet.* 2004;65(1):40-4
10. Keller KE, Yang YF, Sun YY, Sykes R, Gaudette ND, Samples JR, Acott TS, Wirtz MK. Interleukin-20 receptor expression in the trabecular meshwork and its implication in glaucoma. *J Ocul Pharmacol Ther.* 2014;30(2-3):267-76
11. Trifan OC, Traboulsi EI, Stoilova D, Alozie I, Nguyen R, Raja S, Sarfarazi M. A third locus (GLC1D) for adult-onset primary open-angle glaucoma maps to the 8q23 region. *Am J Ophthalmol.* 1998;126(1):17-28
12. Sarfarazi M, Child A, Stoilova D, Brice G, Desai T, Trifan OC, Poinoosawmy D, Crick RP. Localization of the fourth locus (GLC1E) for adult-onset primary open-angle glaucoma to the 10p15-p14 region. *Am J Hum Genet.* 1998;62(3):641-52
13. Rezaie T, Child A, Hitchings R, Brice G, Miller L, Coca-Prados M, Heon E, Krupin T, Ritch R, Kreutzer D, et al. Adult-onset primary open-angle glaucoma caused by mutations in optineurin. *Science.* 2002;295(5557):1077-9
14. Alward WL, Kwon YH, Kawase K, Craig JE, Hayreh SS, Johnson AT, Khanna CL, Yamamoto T, Mackey DA, Roos BR, et al. Evaluation of optineurin sequence variations in 1,048 patients with open-angle glaucoma. *Am J Ophthalmol.* 2003;136(5):904-10
15. Aung T, Ebenezer ND, Brice G, Child AH, Prescott Q, Lehmann OJ, Hitchings RA, Bhattacharya SS. Prevalence of optineurin sequence variants in adult primary open angle glaucoma: implications for diagnostic testing. *J Med Genet.* 2003;40(8):e101
16. Melki R, Belmouden A, Akhayat O, Brezin A, Garchon HJ. The M98K variant of the OPTINEURIN (OPTN) gene modifies initial intraocular pressure in patients with primary open angle glaucoma. *J Med Genet.* 2003;40(11):842-4
17. Sriprya S, Nirmaladevi J, George R, Hemamalini A, Baskaran M, Prema R, Ve Ramesh S, Karthiyayini T, Amali J, Job S, et al. OPTN gene: profile of patients with glaucoma from India. *Mol Vis.* 2006;12:816-20

18. Wirtz MK, Samples JR, Rust K, Lie J, Nordling L, Schilling K, Acott TS, Kramer PL. GLC1F, a new primary open-angle glaucoma locus, maps to 7q35-q36. *Arch Ophthalmol*. 1999;117(2):237-41
19. Murakami K, Meguro A, Ota M, Shiota T, Nomura N, Kashiwagi K, Mabuchi F, Iijima H, Kawase K, Yamamoto T, et al. Analysis of microsatellite polymorphisms within the GLC1F locus in Japanese patients with normal tension glaucoma. *Mol Vis*. 2010;16:462-6
20. Pasutto F, Keller KE, Weisschuh N, Sticht H, Samples JR, Yang YF, Zenkel M, Schlotzer-Schrehardt U, Mardin CY, Frezzotti P, et al. Variants in ASB10 are associated with open-angle glaucoma. *Hum Mol Genet*. 2012;21(6):1336-49
21. Micheal S, Ayub H, Islam F, Siddiqui SN, Khan WA, Akhtar F, Qamar R, Khan MI, den Hollander AI. Variants in the ASB10 Gene Are Associated with Primary Open Angle Glaucoma. *PLoS One*. 2015;10(12):e0145005
22. Fingert JH, Roos BR, Solivan-Timpe F, Miller KA, Oetting TA, Wang K, Kwon YH, Scheetz TE, Stone EM, Alward WL. Analysis of ASB10 variants in open angle glaucoma. *Hum Mol Genet*. 2012;21(20):4543-8
23. Monemi S, Spaeth G, DaSilva A, Popinchalk S, Ilitchiev E, Liebmann J, Ritch R, Heon E, Crick RP, Child A, et al. Identification of a novel adult-onset primary open-angle glaucoma (POAG) gene on 5q22.1. *Hum Mol Genet*. 2005;14(6):725-33
24. Weisschuh N, Wolf C, Wissinger B, Gramer E. Variations in the WDR36 gene in German patients with normal tension glaucoma. *Mol Vis*. 2007;13:724-9
25. Pasutto F, Mardin CY, Michels-Rautenstrauss K, Weber BH, Sticht H, Chavarria-Soley G, Rautenstrauss B, Kruse F, Reis A. Profiling of WDR36 missense variants in German patients with glaucoma. *Invest Ophthalmol Vis Sci*. 2008;49(1):270-4
26. Fan BJ, Wang DY, Cheng CY, Ko WC, Lam SC, Pang CP. Different WDR36 mutation pattern in Chinese patients with primary open-angle glaucoma. *Mol Vis*. 2009;15:646-53
27. Lee MK, Woo SJ, Kim JI, Cho SI, Kim H, Sung J, Seo JS, Kim DM. Replication of a glaucoma candidate gene on 5q22.1 for intraocular pressure in mongolian populations: the GENDISCAN Project. *Invest Ophthalmol Vis Sci*. 2010;51(3):1335-40
28. Mookherjee S, Chakraborty S, Vishal M, Banerjee D, Sen A, Ray K. WDR36 variants in East Indian primary open-angle glaucoma patients. *Mol Vis*. 2011;17:2618-27
29. Frezzotti P, Pescucci C, Papa FT, Iester M, Mittica V, Motolese I, Peruzzi S, Artuso R, Longo I, Mencarelli MA, et al. Association between primary open-angle glaucoma (POAG) and WDR36 sequence variance in Italian families affected by POAG. *Br J Ophthalmol*. 2011;95(5):624-6
30. Blanco-Marchite C, Sanchez-Sanchez F, Lopez-Garrido MP, Iniguez-de-Onzono M, Lopez-Martinez F, Lopez-Sanchez E, Alvarez L, Rodriguez-Calvo PP, Mendez-Hernandez C, Fernandez-Vega L, et al. WDR36 and P53 gene variants and susceptibility to primary open-angle glaucoma: analysis of gene-gene interactions. *Invest Ophthalmol Vis Sci*. 2011;52(11):8467-78
31. Su HA, Li SY, Yang JJ, Yen YC. An Application of NGS for WDR36 Gene in Taiwanese Patients with Juvenile-Onset Open-Angle Glaucoma. *Int J Med Sci*. 2017;14(12):1251-6
32. Suriyapperuma SP, Child A, Desai T, Brice G, Kerr A, Crick RP, Sarfarazi M. A new locus (GLC1H) for adult-onset primary open-angle glaucoma maps to the 2p15-p16 region. *Arch Ophthalmol*. 2007;125(1):86-92
33. Mackay DS, Bennett TM, Shiels A. Exome Sequencing Identifies a Missense Variant in EFEMP1 Co-Segregating in a Family with Autosomal Dominant Primary Open-Angle Glaucoma. *PLoS One*. 2015;10(7):e0132529
34. Allingham RR, Wiggs JL, Hauser ER, Larocque-Abramson KR, Santiago-Turla C, Broome B, Del Bono EA, Graham FL, Haines JL, Pericak-Vance MA, et al. Early adult-onset POAG linked to 15q11-13 using ordered subset analysis. *Invest Ophthalmol Vis Sci*. 2005;46(6):2002-5

35. Woodroffe A, Krafchak CM, Fuse N, Lichter PR, Moroi SE, Schertzer R, Downs CA, Duren WL, Boehnke M, Richards JE. Ordered subset analysis supports a glaucoma locus at GLC1I on chromosome 15 in families with earlier adult age at diagnosis. *Exp Eye Res.* 2006;82(6):1068-74
36. Wiggs JL, Lynch S, Ynagi G, Maselli M, Augustine J, Del Bono EA, Olson LM, Haines JL. A genomewide scan identifies novel early-onset primary open-angle glaucoma loci on 9q22 and 20p12. *Am J Hum Genet.* 2004;74(6):1314-20
37. Wiggs JL, Howell GR, Linkroum K, Abdrabou W, Hodges E, Braine CE, Pasquale LR, Hannon GJ, Haines JL, John SW. Variations in COL15A1 and COL18A1 influence age of onset of primary open angle glaucoma. *Clin Genet.* 2013;84(2):167-74
38. Sud A, Del Bono EA, Haines JL, Wiggs JL. Fine mapping of the GLC1K juvenile primary open-angle glaucoma locus and exclusion of candidate genes. *Mol Vis.* 2008;14:1319-26
39. Baird PN, Foote SJ, Mackey DA, Craig J, Speed TP, Bureau A. Evidence for a novel glaucoma locus at chromosome 3p21-22. *Hum Genet.* 2005;117(2-3):249-57
40. Pang CP, Fan BJ, Canlas O, Wang DY, Dubois S, Tam PO, Lam DS, Raymond V, Ritch R. A genome-wide scan maps a novel juvenile-onset primary open angle glaucoma locus to chromosome 5q. *Mol Vis.* 2006;12:85-92
41. Wang DY, Fan BJ, Chua JK, Tam PO, Leung CK, Lam DS, Pang CP. A genome-wide scan maps a novel juvenile-onset primary open-angle glaucoma locus to 15q. *Invest Ophthalmol Vis Sci.* 2006;47(12):5315-21
42. Fingert JH, Honkanen RA, Shankar SP, Affatigato LM, Ehlinger MA, Moore MD, Jampol LM, Sheffield VC, Stone EM, Alward WL. Familial cavitory optic disk anomalies: identification of a novel genetic locus. *Am J Ophthalmol.* 2007;143(5):795-800
43. Fingert JH, Robin AL, Stone JL, Roos BR, Davis LK, Scheetz TE, Bennett SR, Wassink TH, Kwon YH, Alward WL, et al. Copy number variations on chromosome 12q14 in patients with normal tension glaucoma. *Hum Mol Genet.* 2011;20(12):2482-94
44. Kawase K, Allingham RR, Meguro A, Mizuki N, Roos B, Solivan-Timpe FM, Robin AL, Ritch R, Fingert JH. Confirmation of TBK1 duplication in normal tension glaucoma. *Exp Eye Res.* 2012;96(1):178-80
45. Ritch R, Darbro B, Menon G, Khanna CL, Solivan-Timpe F, Roos BR, Sarfarzi M, Kawase K, Yamamoto T, Robin AL, et al. TBK1 gene duplication and normal-tension glaucoma. *JAMA Ophthalmol.* 2014;132(5):544-8
46. Awadalla MS, Fingert JH, Roos BE, Chen S, Holmes R, Graham SL, Chehade M, Galanopolous A, Ridge B, Souzeau E, et al. Copy number variations of TBK1 in Australian patients with primary open-angle glaucoma. *Am J Ophthalmol.* 2015;159(1):124-30 e1
47. Porter LF, Urquhart JE, O'Donoghue E, Spencer AF, Wade EM, Manson FD, Black GC. Identification of a novel locus for autosomal dominant primary open angle glaucoma on 4q35.1-q35.2. *Invest Ophthalmol Vis Sci.* 2011;52(11):7859-65
48. Stoilov I, Akarsu AN, Sarfarazi M. Identification of three different truncating mutations in cytochrome P4501B1 (CYP1B1) as the principal cause of primary congenital glaucoma (Buphthalmos) in families linked to the GLC3A locus on chromosome 2p21. *Hum Mol Genet.* 1997;6(4):641-7
49. Melki R, Colomb E, Lefort N, Brezin AP, Garchon HJ. CYP1B1 mutations in French patients with early-onset primary open-angle glaucoma. *J Med Genet.* 2004;41(9):647-51
50. Acharya M, Mookherjee S, Bhattacharjee A, Bandyopadhyay AK, Daulat Thakur SK, Bhaduri G, Sen A, Ray K. Primary role of CYP1B1 in Indian juvenile-onset POAG patients. *Mol Vis.* 2006;12:399-404
51. Chakrabarti S, Devi KR, Komatireddy S, Kaur K, Parikh RS, Mandal AK, Chandrasekhar G, Thomas R. Glaucoma-associated CYP1B1 mutations share similar haplotype backgrounds in POAG and PACG phenotypes. *Invest Ophthalmol Vis Sci.* 2007;48(12):5439-44

52. Bhattacharjee A, Banerjee D, Mookherjee S, Acharya M, Banerjee A, Ray A, Sen A, Indian Genome Variation C, Ray K. Leu432Val polymorphism in CYP1B1 as a susceptible factor towards predisposition to primary open-angle glaucoma. *Mol Vis*. 2008;14:841-50
53. Kumar A, Basavaraj MG, Gupta SK, Qamar I, Ali AM, Bajaj V, Ramesh TK, Prakash DR, Shetty JS, Dorairaj SK. Role of CYP1B1, MYOC, OPTN, and OPTC genes in adult-onset primary open-angle glaucoma: predominance of CYP1B1 mutations in Indian patients. *Mol Vis*. 2007;13:667-76
54. Lopez-Garrido MP, Sanchez-Sanchez F, Lopez-Martinez F, Aroca-Aguilar JD, Blanco-Marchite C, Coca-Prados M, Escribano J. Heterozygous CYP1B1 gene mutations in Spanish patients with primary open-angle glaucoma. *Mol Vis*. 2006;12:748-55
55. Pasutto F, Chavarria-Soley G, Mardin CY, Michels-Rautenstrauss K, Ingelman-Sundberg M, Fernandez-Martinez L, Weber BH, Rautenstrauss B, Reis A. Heterozygous loss-of-function variants in CYP1B1 predispose to primary open-angle glaucoma. *Invest Ophthalmol Vis Sci*. 2010;51(1):249-54
56. Patel HY, Richards AJ, De Karolyi B, Best SJ, Danesh-Meyer HV, Vincent AL. Screening glaucoma genes in adult glaucoma suggests a multiallelic contribution of CYP1B1 to open-angle glaucoma phenotypes. *Clin Experiment Ophthalmol*. 2012;40(4):e208-17
57. Wang Z, Li M, Li L, Sun H, Lin XY. Association of single nucleotide polymorphisms in the CYP1B1 gene with the risk of primary open-angle glaucoma: a meta-analysis. *Genet Mol Res*. 2015;14(4):17262-72
58. Micheal S, Ayub H, Zafar SN, Bakker B, Ali M, Akhtar F, Islam F, Khan MI, Qamar R, den Hollander AI. Identification of novel CYP1B1 gene mutations in patients with primary congenital and primary open-angle glaucoma. *Clin Exp Ophthalmol*. 2015;43(1):31-9
59. Wolf C, Gramer E, Muller-Myhsok B, Pasutto F, Reinthal E, Wissinger B, Weisschuh N. Evaluation of nine candidate genes in patients with normal tension glaucoma: a case control study. *BMC Med Genet*. 2009;10:91
60. Fan BJ, Liu K, Wang DY, Tham CC, Tam PO, Lam DS, Pang CP. Association of polymorphisms of tumor necrosis factor and tumor protein p53 with primary open-angle glaucoma. *Invest Ophthalmol Vis Sci*. 2010;51(8):4110-6
61. Dong S, Yang J, Yu W, Kota P, Xia X, Xu H. No association of genetic polymorphisms in CYP1B1 with primary open-angle glaucoma: a meta- and gene-based analysis. *Mol Vis*. 2012;18:786-96
62. Abu-Amro KK, Sultan T, Al-Obeidan SA, Kondkar AA. Analysis of CYP1B1 sequence alterations in patients with primary open-angle glaucoma of Saudi origin. *Clin Ophthalmol*. 2018;12:1413-6
63. Huang X, Wang N, Xiao X, Li S, Zhang Q. A novel truncation mutation in GJA1 associated with open angle glaucoma and microcornea in a large Chinese family. *Eye (Lond)*. 2015;29(7):972-7
64. Micheal S, Saksens NT, Hogewind BF, Khan MI, Hoyng CB, den Hollander AI. Identification of TP53BP2 as a Novel Candidate Gene for Primary Open Angle Glaucoma by Whole Exome Sequencing in a Large Multiplex Family. *Mol Neurobiol*. 2017
65. Hysi PG, Cheng CY, Springelkamp H, Macgregor S, Bailey JN, Wojciechowski R, Vitart V, Nag A, Hewitt AW, Hohn R, et al. Genome-wide analysis of multi-ancestry cohorts identifies new loci influencing intraocular pressure and susceptibility to glaucoma. *Nat Genet*. 2014;46(10):1126-30
66. Gharahkhani P, Burdon KP, Fogarty R, Sharma S, Hewitt AW, Martin S, Law MH, Cremin K, Bailey JN, Loomis SJ, et al. Common variants near ABCA1, AFAP1 and GMDS confer risk of primary open-angle glaucoma. *Nat Genet*. 2014;46(10):1120-5
67. Bailey JN, Loomis SJ, Kang JH, Allingham RR, Gharahkhani P, Khor CC, Burdon KP, Aschard H, Chasman DI, Igo RP, Jr., et al. Genome-wide association analysis identifies TXNRD2, ATXN2 and FOXC1 as susceptibility loci for primary open-angle glaucoma. *Nat Genet*. 2016;48(2):189-94
68. Choquet H, Thai KK, Yin J, Hoffmann TJ, Kvale MN, Banda Y, Schaefer C, Risch N, Nair KS, Melles R, et al. A large multi-ethnic genome-wide association study identifies novel genetic loci for intraocular pressure. *Nat Commun*. 2017;8(1):2108

69. Choquet H, Paylakhi S, Kneeland SC, Thai KK, Hoffmann TJ, Yin J, Kvale MN, Banda Y, Tolman NG, Williams PA, et al. A multiethnic genome-wide association study of primary open-angle glaucoma identifies novel risk loci. *Nat Commun.* 2018;9(1):2278
70. Chen Y, Lin Y, Vithana EN, Jia L, Zuo X, Wong TY, Chen LJ, Zhu X, Tam PO, Gong B, et al. Common variants near ABCA1 and in PMM2 are associated with primary open-angle glaucoma. *Nat Genet.* 2014;46(10):1115-9
71. Springelkamp H, Iglesias AI, Mishra A, Hohn R, Wojciechowski R, Khawaja AP, Nag A, Wang YX, Wang JJ, Cuellar-Partida G, et al. New insights into the genetics of primary open-angle glaucoma based on meta-analyses of intraocular pressure and optic disc characteristics. *Hum Mol Genet.* 2017
72. Springelkamp H, Mishra A, Hysi PG, Gharahkhani P, Hohn R, Khor CC, Cooke Bailey JN, Luo X, Ramdas WD, Vithana E, et al. Meta-analysis of Genome-Wide Association Studies Identifies Novel Loci Associated With Optic Disc Morphology. *Genet Epidemiol.* 2015;39(3):207-16
73. Khan MI, Micheal S, Akhtar F, Naveed A, Ahmed A, Qamar R. Association of ABO blood groups with glaucoma in the Pakistani population. *Can J Ophthalmol.* 2009;44(5):582-6
74. Lu Y, Vitart V, Burdon KP, Khor CC, Bykhovskaya Y, Mirshahi A, Hewitt AW, Koehn D, Hysi PG, Ramdas WD, et al. Genome-wide association analyses identify multiple loci associated with central corneal thickness and keratoconus. *Nat Genet.* 2013;45(2):155-63
75. Springelkamp H, Hohn R, Mishra A, Hysi PG, Khor CC, Loomis SJ, Bailey JN, Gibson J, Thorleifsson G, Janssen SF, et al. Meta-analysis of genome-wide association studies identifies novel loci that influence cupping and the glaucomatous process. *Nat Commun.* 2014;5:4883
76. Iglesias AI, Mishra A, Vitart V, Bykhovskaya Y, Hohn R, Springelkamp H, Cuellar-Partida G, Gharahkhani P, Bailey JNC, Willoughby CE, et al. Cross-ancestry genome-wide association analysis of corneal thickness strengthens link between complex and Mendelian eye diseases. *Nat Commun.* 2018;9(1):1864
77. Vitart V, Bencic G, Hayward C, Skunca Herman J, Huffman J, Campbell S, Bucan K, Navarro P, Gunjaca G, Marin J, et al. New loci associated with central cornea thickness include COL5A1, AKAP13 and AVGR8. *Hum Mol Genet.* 2010;19(21):4304-11
78. Vithana EN, Aung T, Khor CC, Cornes BK, Tay WT, Sim X, Lavanya R, Wu R, Zheng Y, Hibberd ML, et al. Collagen-related genes influence the glaucoma risk factor, central corneal thickness. *Hum Mol Genet.* 2011;20(4):649-58
79. Cornes BK, Khor CC, Nongpiur ME, Xu L, Tay WT, Zheng Y, Lavanya R, Li Y, Wu R, Sim X, et al. Identification of four novel variants that influence central corneal thickness in multi-ethnic Asian populations. *Hum Mol Genet.* 2012;21(2):437-45
80. Ulmer M, Li J, Yaspan BL, Ozel AB, Richards JE, Moroi SE, Hawthorne F, Budenz DL, Friedman DS, Gaasterland D, et al. Genome-wide analysis of central corneal thickness in primary open-angle glaucoma cases in the NEIGHBOR and GLAUGEN consortia. *Invest Ophthalmol Vis Sci.* 2012;53(8):4468-74
81. Mabuchi F, Tang S, Ando D, Yamakita M, Wang J, Kashiwagi K, Yamagata Z, Iijima H, Tsukahara S. The apolipoprotein E gene polymorphism is associated with open angle glaucoma in the Japanese population. *Mol Vis.* 2005;11:609-12
82. Fan BJ, Wang DY, Fan DS, Tam PO, Lam DS, Tham CC, Lam CY, Lau TC, Pang CP. SNPs and interaction analyses of myocilin, optineurin, and apolipoprotein E in primary open angle glaucoma patients. *Mol Vis.* 2005;11:625-31
83. Lam CY, Fan BJ, Wang DY, Tam PO, Yung Tham CC, Leung DY, Ping Fan DS, Chiu Lam DS, Pang CP. Association of apolipoprotein E polymorphisms with normal tension glaucoma in a Chinese population. *J Glaucoma.* 2006;15(3):218-22
84. Al-Dabbagh NM, Al-Dohayan N, Arfin M, Tariq M. Apolipoprotein E polymorphisms and primary glaucoma in Saudis. *Mol Vis.* 2009;15:912-9

- 85.** Vickers JC, Craig JE, Stankovich J, McCormack GH, West AK, Dickinson JL, McCartney PJ, Coote MA, Healey DL, Mackey DA. The apolipoprotein epsilon4 gene is associated with elevated risk of normal tension glaucoma. *Mol Vis.* 2002;8:389-93
- 86.** Rassiniotis T, Griffiths PG, Birch M, Keers S, Chinnery PF. The role of apolipoprotein E gene polymorphisms in primary open-angle glaucoma. *Arch Ophthalmol.* 2004;122(2):258-61
- 87.** Saglar E, Yucel D, Bozkurt B, Ozgul RK, Irkec M, Ogus A. Association of polymorphisms in APOE, p53, and p21 with primary open-angle glaucoma in Turkish patients. *Mol Vis.* 2009;15:1270-6
- 88.** Zetterberg M, Tasa G, Palmer MS, Juronen E, Teesalu P, Blennow K, Zetterberg H. Apolipoprotein E polymorphisms in patients with primary open-angle glaucoma. *Am J Ophthalmol.* 2007;143(6):1059-60
- 89.** Lake S, Liverani E, Desai M, Casson R, James B, Clark A, Salmon JF. Normal tension glaucoma is not associated with the common apolipoprotein E gene polymorphisms. *Br J Ophthalmol.* 2004;88(4):491-3
- 90.** Nowak A, Majsterek I, Przybylowska-Sygut K, Pytel D, Szymanek K, Szaflik J, Szaflik JP. Analysis of the expression and polymorphism of APOE, HSP, BDNF, and GRIN2B genes associated with the neurodegeneration process in the pathogenesis of primary open angle glaucoma. *Biomed Res Int.* 2015;2015:258281
- 91.** Chiras D, Tzika K, Kokotas H, Oliveira SC, Grigoriadou M, Kastania A, Dima K, Stefaniotou M, Aspiotis M, Petersen MB, et al. Development of novel LOXL1 genotyping method and evaluation of LOXL1, APOE and MTHFR polymorphisms in exfoliation syndrome/glaucoma in a Greek population. *Mol Vis.* 2013;19:1006-16
- 92.** Liao R, Ye M, Xu X. An updated meta-analysis: apolipoprotein E genotypes and risk of primary open-angle glaucoma. *Mol Vis.* 2014;20:1025-36
- 93.** Springelkamp H, Iglesias AI, Cuellar-Partida G, Amin N, Burdon KP, van Leeuwen EM, Gharahkhani P, Mishra A, van der Lee SJ, Hewitt AW, et al. ARHGEF12 influences the risk of glaucoma by increasing intraocular pressure. *Hum Mol Genet.* 2015;24(9):2689-99
- 94.** Axenovich T, Zorkoltseva I, Belonogova N, van Koolwijk LM, Borodin P, Kirichenko A, Babenko V, Ramdas WD, Amin N, Despriet DD, et al. Linkage and association analyses of glaucoma related traits in a large pedigree from a Dutch genetically isolated population. *J Med Genet.* 2011;48(12):802-9
- 95.** Ramdas WD, van Koolwijk LM, Ikram MK, Janssen NM, de Jong PT, Bergen AA, Isaacs A, Amin N, Aulchenko YS, Wolfs RC, et al. A genome-wide association study of optic disc parameters. *PLoS Genet.* 2010;6(6):e1000978
- 96.** Ramdas WD, van Koolwijk LM, Lemij HG, Pasutto F, Cree AJ, Thorleifsson G, Janssen SF, Jacoline TB, Amin N, Rivadeneira F, et al. Common genetic variants associated with open-angle glaucoma. *Hum Mol Genet.* 2011;20(12):2464-71
- 97.** Mabuchi F, Sakurada Y, Kashiwagi K, Yamagata Z, Iijima H, Tsukahara S. Association between genetic variants associated with vertical cup-to-disc ratio and phenotypic features of primary open-angle glaucoma. *Ophthalmology.* 2012;119(9):1819-25
- 98.** Fan BJ, Wang DY, Pasquale LR, Haines JL, Wiggs JL. Genetic variants associated with optic nerve vertical cup-to-disc ratio are risk factors for primary open angle glaucoma in a US Caucasian population. *Invest Ophthalmol Vis Sci.* 2011;52(3):1788-92
- 99.** Nannini DR, Torres M, Chen YI, Taylor KD, Rotter JI, Varma R, Gao X. A Genome-Wide Association Study of Vertical Cup-Disc Ratio in a Latino Population. *Invest Ophthalmol Vis Sci.* 2017;58(1):87-95
- 100.** Macgregor S, Hewitt AW, Hysi PG, Ruddle JB, Medland SE, Henders AK, Gordon SD, Andrew T, McEvoy B, Sanfilippo PG, et al. Genome-wide association identifies ATOH7 as a major gene determining human optic disc size. *Hum Mol Genet.* 2010;19(13):2716-24
- 101.** Khor CC, Ramdas WD, Vithana EN, Cornes BK, Sim X, Tay WT, Saw SM, Zheng Y, Lavanya R, Wu R, et al. Genome-wide association studies in Asians confirm the involvement of ATOH7 and TGFB3, and further identify CARD10 as a novel locus influencing optic disc area. *Hum Mol Genet.* 2011;20(9):1864-72

- 102.** Venturini C, Nag A, Hysi PG, Wang JJ, Wong TY, Healey PR, Mitchell P, Hammond CJ, Viswanathan AC, Wellcome Trust Case Control Consortium BGG. Clarifying the role of ATOH7 in glaucoma endophenotypes. *Br J Ophthalmol*. 2014;98(4):562-6
- 103.** Chen JH, Wang D, Huang C, Zheng Y, Chen H, Pang CP, Zhang M. Interactive effects of ATOH7 and RFTN1 in association with adult-onset primary open-angle glaucoma. *Invest Ophthalmol Vis Sci*. 2012;53(2):779-85
- 104.** Philomenadin FS, Asokan R, N V, George R, Lingam V, Sarangapani S. Genetic association of SNPs near ATOH7, CARD10, CDKN2B, CDC7 and SIX1/SIX6 with the endophenotypes of primary open angle glaucoma in Indian population. *PLoS One*. 2015;10(3):e0119703
- 105.** Thorleifsson G, Walters GB, Hewitt AW, Masson G, Helgason A, DeWan A, Sigurdsson A, Jonasdottir A, Gudjonsson SA, Magnusson KP, et al. Common variants near CAV1 and CAV2 are associated with primary open-angle glaucoma. *Nat Genet*. 2010;42(10):906-9
- 106.** Wiggs JL, Kang JH, Yaspan BL, Mirel DB, Laurie C, Crenshaw A, Brodeur W, Gogarten S, Olson LM, Abdrabou W, et al. Common variants near CAV1 and CAV2 are associated with primary open-angle glaucoma in Caucasians from the USA. *Hum Mol Genet*. 2011;20(23):4707-13
- 107.** Zanon-Moreno V, Ortega-Azorin C, Asensio-Marquez EM, Garcia-Medina JJ, Pinazo-Duran MD, Coltell O, Ordoñas JM, Corella D. A Multi-Locus Genetic Risk Score for Primary Open-Angle Glaucoma (POAG) Variants Is Associated with POAG Risk in a Mediterranean Population: Inverse Correlations with Plasma Vitamin C and E Concentrations. *Int J Mol Sci*. 2017;18(11)
- 108.** Nunes HF, Ananina G, Costa VP, Zanchin NIT, de Vasconcellos JPC, de Melo MB. Investigation of CAV1/CAV2 rs4236601 and CDKN2B-AS1 rs2157719 in primary open-angle glaucoma patients from Brazil. *Ophthalmic Genet*. 2018;39(2):194-9
- 109.** Rong SS, Chen LJ, Leung CK, Matsushita K, Jia L, Miki A, Chiang SW, Tam PO, Hashida N, Young AL, et al. Ethnic specific association of the CAV1/CAV2 locus with primary open-angle glaucoma. *Sci Rep*. 2016;6:27837
- 110.** Osman W, Low SK, Takahashi A, Kubo M, Nakamura Y. A genome-wide association study in the Japanese population confirms 9p21 and 14q23 as susceptibility loci for primary open angle glaucoma. *Hum Mol Genet*. 2012;21(12):2836-42
- 111.** Dimasi DP, Burdon KP, Hewitt AW, Savarirayan R, Healey PR, Mitchell P, Mackey DA, Craig JE. Candidate gene study to investigate the genetic determinants of normal variation in central corneal thickness. *Mol Vis*. 2010;16:562-9
- 112.** Trikha S, Saffari E, Nongpiur M, Baskaran M, Ho H, Li Z, Tan PY, Allen J, Khor CC, Perera SA, et al. A Genetic Variant in TGFBR3-CDC7 Is Associated with Visual Field Progression in Primary Open-Angle Glaucoma Patients from Singapore. *Ophthalmology*. 2015;122(12):2416-22
- 113.** Dimasi DP, Burdon KP, Hewitt AW, Fitzgerald J, Wang JJ, Healey PR, Mitchell P, Mackey DA, Craig JE. Genetic investigation into the endophenotypic status of central corneal thickness and optic disc parameters in relation to open-angle glaucoma. *Am J Ophthalmol*. 2012;154(5):833-42 e2
- 114.** Cao D, Jiao X, Liu X, Hennis A, Leske MC, Nemesure B, Hejtmancik JF. CDKN2B polymorphism is associated with primary open-angle glaucoma (POAG) in the Afro-Caribbean population of Barbados, West Indies. *PLoS One*. 2012;7(6):e39278
- 115.** Hu Z, He C. CDKN2B gene rs1063192 polymorphism decreases the risk of glaucoma. *Oncotarget*. 2017;8(13):21167-76
- 116.** Abu-Amro KK, Kondkar AA, Mousa A, Almobarak FA, Alawad A, Altuwaijri S, Sultan T, Azad TA, Al-Obeidan SA. Analysis of Cyclin-Dependent Kinase Inhibitor-2B rs1063192 Polymorphism in Saudi Patients with Primary Open-Angle Glaucoma. *Genet Test Mol Biomarkers*. 2016;20(10):637-41
- 117.** Takamoto M, Kaburaki T, Mabuchi A, Araie M, Amano S, Aihara M, Tomidokoro A, Iwase A, Mabuchi F, Kashiwagi K, et al. Common variants on chromosome 9p21 are associated with normal tension glaucoma. *PLoS One*. 2012;7(7):e40107

- 118.** Nakano M, Ikeda Y, Tokuda Y, Fuwa M, Omi N, Ueno M, Imai K, Adachi H, Kageyama M, Mori K, et al. Common variants in CDKN2B-AS1 associated with optic-nerve vulnerability of glaucoma identified by genome-wide association studies in Japanese. *PLoS One*. 2012;7(3):e33389
- 119.** Burdon KP, Macgregor S, Hewitt AW, Sharma S, Chidlow G, Mills RA, Danoy P, Casson R, Viswanathan AC, Liu JZ, et al. Genome-wide association study identifies susceptibility loci for open angle glaucoma at TMCO1 and CDKN2B-AS1. *Nat Genet*. 2011;43(6):574-8
- 120.** Wiggs JL, Yaspan BL, Hauser MA, Kang JH, Allingham RR, Olson LM, Abdrabou W, Fan BJ, Wang DY, Brodeur W, et al. Common variants at 9p21 and 8q22 are associated with increased susceptibility to optic nerve degeneration in glaucoma. *PLoS Genet*. 2012;8(4):e1002654
- 121.** Shiga Y, Nishiguchi KM, Kawai Y, Kojima K, Sato K, Fujita K, Takahashi M, Omodaka K, Araie M, Kashiwagi K, et al. Genetic analysis of Japanese primary open-angle glaucoma patients and clinical characterization of risk alleles near CDKN2B-AS1, SIX6 and GAS7. *PLoS One*. 2017;12(12):e0186678
- 122.** Gibson J, Griffiths H, De Salvo G, Cole M, Jacob A, Macleod A, Yang Y, Menon G, Cree A, Ennis S, et al. Genome-wide association study of primary open angle glaucoma risk and quantitative traits. *Mol Vis*. 2012;18:1083-92
- 123.** Hoehn R, Zeller T, Verhoeven VJ, Grus F, Adler M, Wolfs RC, Uitterlinden AG, Castagne R, Schillert A, Klaver CC, et al. Population-based meta-analysis in Caucasians confirms association with COL5A1 and ZNF469 but not COL8A2 with central corneal thickness. *Hum Genet*. 2012;131(11):1783-93
- 124.** Gao X, Gauderman WJ, Liu Y, Marjoram P, Torres M, Haritunians T, Kuo JZ, Chen YD, Allingham RR, Hauser MA, et al. A genome-wide association study of central corneal thickness in Latinos. *Invest Ophthalmol Vis Sci*. 2013;54(4):2435-43
- 125.** Gao X, Nannini DR, Corrao K, Torres M, Chen YI, Fan BJ, Wiggs JL, International Glaucoma Genetics C, Taylor KD, Gauderman WJ, et al. Genome-wide association study identifies WNT7B as a novel locus for central corneal thickness in Latinos. *Hum Mol Genet*. 2016
- 126.** Desronvil T, Logan-Wyatt D, Abdrabou W, Triana M, Jones R, Taheri S, Del Bono E, Pasquale LR, Olivier M, Haines JL, et al. Distribution of COL8A2 and COL8A1 gene variants in Caucasian primary open angle glaucoma patients with thin central corneal thickness. *Mol Vis*. 2010;16:2185-91
- 127.** Pasquale LR, Loomis SJ, Weinreb RN, Kang JH, Yaspan BL, Bailey JC, Gaasterland D, Gaasterland T, Lee RK, Scott WK, et al. Estrogen pathway polymorphisms in relation to primary open angle glaucoma: an analysis accounting for gender from the United States. *Mol Vis*. 2013;19:1471-81
- 128.** Hoffmann TJ, Tang H, Thornton TA, Caan B, Haan M, Millen AE, Thomas F, Risch N. Genome-wide association and admixture analysis of glaucoma in the Women's Health Initiative. *Hum Mol Genet*. 2014;23(24):6634-43
- 129.** Nag A, Venturini C, Small KS, International Glaucoma Genetics C, Young TL, Viswanathan AC, Mackey DA, Hysi PG, Hammond C. A genome-wide association study of intra-ocular pressure suggests a novel association in the gene FAM125B in the TwinsUK cohort. *Hum Mol Genet*. 2014;23(12):3343-8
- 130.** van Koolwijk LM, Ramdas WD, Ikram MK, Jansonius NM, Pasutto F, Hysi PG, Macgregor S, Janssen SF, Hewitt AW, Viswanathan AC, et al. Common genetic determinants of intraocular pressure and primary open-angle glaucoma. *PLoS Genet*. 2012;8(5):e1002611
- 131.** Kondkar AA, Azad TA, Almobarak FA, Kalantan H, Sultan T, Al-Obeidan SA, Abu-Amro KK. Polymorphism rs11656696 in GAS7 Is Not Associated with Primary Open Angle Glaucoma in a Saudi Cohort. *Genet Test Mol Biomarkers*. 2017;21(12):754-8
- 132.** Blue Mountains Eye S, Wellcome Trust Case Control C. Genome-wide association study of intraocular pressure identifies the GLCCI1/ICA1 region as a glaucoma susceptibility locus. *Hum Mol Genet*. 2013;22(22):4653-60
- 133.** Izzotti A, Bagnis A, Sacca SC. The role of oxidative stress in glaucoma. *Mutat Res*. 2006;612(2):105-14

- 134.** Yildirim O, Ates NA, Tamer L, Oz O, Yilmaz A, Atik U, Camdeviren H. May glutathione S-transferase M1 positive genotype afford protection against primary open-angle glaucoma? *Graefes Arch Clin Exp Ophthalmol.* 2005;243(4):327-33
- 135.** Abu-Amero KK, Morales J, Mohamed GH, Osman MN, Bosley TM. Glutathione S-transferase M1 and T1 polymorphisms in Arab glaucoma patients. *Mol Vis.* 2008;14:425-30
- 136.** Rocha AV, Talbot T, Magalhaes da Silva T, Almeida MC, Menezes CA, Di Pietro G, Rios-Santos F. Is the GSTM1 null polymorphism a risk factor in primary open angle glaucoma? *Mol Vis.* 2011;17:1679-86
- 137.** Huang W, Wang W, Zhou M, Chen S, Zhang X. Association of glutathione S-transferase polymorphisms (GSTM1 and GSTT1) with primary open-angle glaucoma: an evidence-based meta-analysis. *Gene.* 2013;526(2):80-6
- 138.** Lavaris A, Gazouli M, Brouzas D, Moschos MM. Polymorphism Analysis of GSTM1 and OPA1 Genes in Greek Patients with Primary Open-angle Glaucoma. *In Vivo.* 2016;30(4):473-7
- 139.** Stamenkovic M, Lukic V, Suvakov S, Simic T, Sencanin I, Pljesa-Ercegovac M, Jaksic V, Babovic S, Matic M, Radosavljevic A, et al. GSTM1-null and GSTT1-active genotypes as risk determinants of primary open angle glaucoma among smokers. *Int J Ophthalmol.* 2018;11(9):1514-20
- 140.** Juronen E, Tasa G, Veromann S, Parts L, Tiidla A, Pulges R, Panov A, Soovere L, Koka K, Mikelsaar AV. Polymorphic glutathione S-transferase M1 is a risk factor of primary open-angle glaucoma among Estonians. *Exp Eye Res.* 2000;71(5):447-52
- 141.** Unal M, Guven M, Devranoglu K, Ozaydin A, Batar B, Tamcelik N, Gorgun EE, Ucar D, Sarici A. Glutathione S transferase M1 and T1 genetic polymorphisms are related to the risk of primary open-angle glaucoma: a study in a Turkish population. *Br J Ophthalmol.* 2007;91(4):527-30
- 142.** Malik MA, Gupta V, Shukla S, Kaur J. Glutathione S-transferase (GSTM1, GSTT1) polymorphisms and JOAG susceptibility: A case control study and meta-analysis in glaucoma. *Gene.* 2017;628:246-52
- 143.** Majsterek I, Markiewicz L, Przybylowska K, Gacek M, Kurowska AK, Kaminska A, Szaflik J, Szaflik JP. Association of MMP1-1607 1G/2G and TIMP1 372 T/C gene polymorphisms with risk of primary open angle glaucoma in a Polish population. *Med Sci Monit.* 2011;17(7):CR417-21
- 144.** Markiewicz L, Majsterek I, Przybylowska K, Dziki L, Waszczyk M, Gacek M, Kaminska A, Szaflik J, Szaflik JP. Gene polymorphisms of the MMP1, MMP9, MMP12, IL-1beta and TIMP1 and the risk of primary open-angle glaucoma. *Acta Ophthalmol.* 2013;91(7):e516-23
- 145.** Micheal S, Yousaf S, Khan MI, Akhtar F, Islam F, Khan WA, den Hollander AI, Qamar R, Ahmed A. Polymorphisms in matrix metalloproteinases MMP1 and MMP9 are associated with primary open-angle and angle closure glaucoma in a Pakistani population. *Mol Vis.* 2013;19:441-7
- 146.** He M, Wang W, Han X, Huang W. Matrix metalloproteinase-1 rs1799750 polymorphism and glaucoma: A meta-analysis. *Ophthalmic Genet.* 2016;1-6
- 147.** Zhang Y, Wang M, Zhang S. Association of MMP-9 Gene Polymorphisms with Glaucoma: A Meta-Analysis. *Ophthalmic Res.* 2016;55(4):172-9
- 148.** Thakur N, Kupani M, Pandey RK, Mannan R, Pruthi A, Mehrotra S. Genetic association of -1562C>T polymorphism in the MMP9 gene with primary glaucoma in a north Indian population. *PLoS One.* 2018;13(2):e0192636
- 149.** Suh W, Won HH, Kee C. The Association of Single-Nucleotide Polymorphisms in the MMP-9 Gene with Normal Tension Glaucoma and Primary Open-Angle Glaucoma. *Curr Eye Res.* 2018;43(4):534-8
- 150.** Tunny TJ, Richardson KA, Clark CV, Gordon RD. The atrial natriuretic peptide gene in patients with familial primary open-angle glaucoma. *Biochem Biophys Res Commun.* 1996;223(2):221-5
- 151.** Ayub H, Khan MI, Micheal S, Akhtar F, Ajmal M, Shafique S, Ali SH, den Hollander AI, Ahmed A, Qamar R. Association of eNOS and HSP70 gene polymorphisms with glaucoma in Pakistani cohorts. *Mol Vis.* 2010;16:18-25
- 152.** Lin HJ, Tsai CH, Tsai FJ, Chen WC, Tsai SW, Fan SS. Distribution of oxidation enzyme eNOS and myeloperoxidase in primary open angle glaucoma. *J Clin Lab Anal.* 2005;19(2):87-92

- 153.** Emam WA, Zidan HE, Abdulhalim BE, Dabour SA, Ghali MA, Kamal AT. Endothelial nitric oxide synthase polymorphisms and susceptibility to high-tension primary open-angle glaucoma in an Egyptian cohort. *Mol Vis.* 2014;20:804-11
- 154.** Kang JH, Wiggs JL, Rosner BA, Haines J, Abdrabou W, Pasquale LR. Endothelial nitric oxide synthase gene variants and primary open-angle glaucoma: interactions with hypertension, alcohol intake, and cigarette smoking. *Arch Ophthalmol.* 2011;129(6):773-80
- 155.** Xiang Y, Dong Y, Li X, Tang X. Association of Common Variants in eNOS Gene with Primary Open Angle Glaucoma: A Meta-Analysis. *J Ophthalmol.* 2016;2016:1348347
- 156.** Jeoung JW, Kim DM, Oh S, Lee JS, Park SS, Kim JY. The Relation Between Endothelial Nitric Oxide Synthase Polymorphisms and Normal Tension Glaucoma. *J Glaucoma.* 2017;26(11):1030-5
- 157.** Logan JF, Chakravarthy U, Hughes AE, Patterson CC, Jackson JA, Rankin SJ. Evidence for association of endothelial nitric oxide synthase gene in subjects with glaucoma and a history of migraine. *Invest Ophthalmol Vis Sci.* 2005;46(9):3221-6
- 158.** Weiss J, Frankl SA, Flammer J, Grieshaber MC, Hollo G, Teuchner B, Haefeli WE. No difference in genotype frequencies of polymorphisms of the nitric oxide pathway between Caucasian normal and high tension glaucoma patients. *Mol Vis.* 2012;18:2174-81
- 159.** Kang JH, Wiggs JL, Rosner BA, Hankinson SE, Abdrabou W, Fan BJ, Haines J, Pasquale LR. Endothelial nitric oxide synthase gene variants and primary open-angle glaucoma: interactions with sex and postmenopausal hormone use. *Invest Ophthalmol Vis Sci.* 2010;51(2):971-9
- 160.** Magalhaes da Silva T, Rocha AV, Lacchini R, Marques CR, Silva ES, Tanus-Santos JE, Rios-Santos F. Association of polymorphisms of endothelial nitric oxide synthase (eNOS) gene with the risk of primary open angle glaucoma in a Brazilian population. *Gene.* 2012;502(2):142-6
- 161.** Kang JH, Wiggs JL, Haines J, Abdrabou W, Pasquale LR. Reproductive factors and NOS3 variant interactions in primary open-angle glaucoma. *Mol Vis.* 2011;17:2544-51
- 162.** Liao Q, Wang DH, Sun HJ. Association of genetic polymorphisms of eNOS with glaucoma. *Mol Vis.* 2011;17:153-8
- 163.** Pasutto F, Matsumoto T, Mardin CY, Sticht H, Brandstatter JH, Michels-Rautenstrauss K, Weisschuh N, Gramer E, Ramdas WD, van Koolwijk LM, et al. Heterozygous NTF4 mutations impairing neurotrophin-4 signaling in patients with primary open-angle glaucoma. *Am J Hum Genet.* 2009;85(4):447-56
- 164.** Vithana EN, Nongpiur ME, Venkataraman D, Chan SH, Mavinahalli J, Aung T. Identification of a novel mutation in the NTF4 gene that causes primary open-angle glaucoma in a Chinese population. *Mol Vis.* 2010;16:1640-5
- 165.** Chen LJ, Ng TK, Fan AH, Leung DY, Zhang M, Wang N, Zheng Y, Liang XY, Chiang SW, Tam PO, et al. Evaluation of NTF4 as a causative gene for primary open-angle glaucoma. *Mol Vis.* 2012;18:1763-72
- 166.** Liu Y, Liu W, Crooks K, Schmidt S, Allingham RR, Hauser MA. No evidence of association of heterozygous NTF4 mutations in patients with primary open-angle glaucoma. *Am J Hum Genet.* 2010;86(3):498-9; author reply 500
- 167.** Rao KN, Kaur I, Parikh RS, Mandal AK, Chandrasekhar G, Thomas R, Chakrabarti S. Variations in NTF4, VAV2, and VAV3 genes are not involved with primary open-angle and primary angle-closure glaucomas in an indian population. *Invest Ophthalmol Vis Sci.* 2010;51(10):4937-41
- 168.** Aung T, Ocaka L, Ebenezer ND, Morris AG, Krawczak M, Thiselton DL, Alexander C, Votruba M, Brice G, Child AH, et al. A major marker for normal tension glaucoma: association with polymorphisms in the OPA1 gene. *Hum Genet.* 2002;110(1):52-6
- 169.** Yu-Wai-Man P, Stewart JD, Hudson G, Andrews RM, Griffiths PG, Birch MK, Chinnery PF. OPA1 increases the risk of normal but not high tension glaucoma. *J Med Genet.* 2010;47(2):120-5
- 170.** Guo Y, Chen X, Zhang H, Li N, Yang X, Cheng W, Zhao K. Association of OPA1 polymorphisms with NTG and HTG: a meta-analysis. *PLoS One.* 2012;7(8):e42387

- 171.** Woo SJ, Kim DM, Kim JY, Park SS, Ko HS, Yoo T. Investigation of the association between OPA1 polymorphisms and normal-tension glaucoma in Korea. *J Glaucoma*. 2004;13(6):492-5
- 172.** Powell BL, Toomes C, Scott S, Yeung A, Marchbank NJ, Spry PG, Lumb R, Inglehearn CF, Churchill AJ. Polymorphisms in OPA1 are associated with normal tension glaucoma. *Mol Vis*. 2003;9:460-4
- 173.** Mabuchi F, Tang S, Kashiwagi K, Yamagata Z, Iijima H, Tsukahara S. The OPA1 gene polymorphism is associated with normal tension and high tension glaucoma. *Am J Ophthalmol*. 2007;143(1):125-30
- 174.** Gasten AC, Ramdas WD, Broer L, van Koolwijk LM, Ikram MK, de Jong PT, Aulchenko YS, Wolfs RC, Hofman A, Rivadeneira F, et al. A genetic epidemiologic study of candidate genes involved in the optic nerve head morphology. *Invest Ophthalmol Vis Sci*. 2012;53(3):1485-91
- 175.** Nakano M, Ikeda Y, Taniguchi T, Yagi T, Fuwa M, Omi N, Tokuda Y, Tanaka M, Yoshii K, Kageyama M, et al. Three susceptible loci associated with primary open-angle glaucoma identified by genome-wide association study in a Japanese population. *Proc Natl Acad Sci U S A*. 2009;106(31):12838-42
- 176.** Chen LJ, Tam PO, Leung DY, Fan AH, Zhang M, Tham CC, Chiang SW, Fan BJ, Wang N, Pang CP. SNP rs1533428 at 2p16.3 as a marker for late-onset primary open-angle glaucoma. *Mol Vis*. 2012;18:1629-39
- 177.** Kondkar AA, Sultan T, Almobarak FA, Kalantan H, Abu-Amero KK, Al-Obeidan SA. Plexin domain containing 2 (PLXDC2) gene polymorphism rs7081455 may not influence POAG risk in a Saudi cohort. *BMC Res Notes*. 2018;11(1):733
- 178.** Kim K, Heo DW, Kim S, Kim JS, Kim CS, Kang C. Expansive marker analysis replicating the association of glaucoma susceptibility with human chromosome loci 1q43 and 10p12.31. *Eur J Hum Genet*. 2014;22(3):409-13
- 179.** Matovinovic E, Kho PF, Lea RA, Benton MC, Eccles DA, Haupt LM, Hewitt AW, Sherwin JC, Mackey DA, Griffiths LR. Genome-wide linkage and association analysis of primary open-angle glaucoma endophenotypes in the Norfolk Island isolate. *Mol Vis*. 2017;23:660-5
- 180.** Kuo JZ, Zangwill LM, Medeiros FA, Liebmann JM, Girkin CA, Hammel N, Rotter JI, Weinreb RN. Quantitative Trait Locus Analysis of SIX1-SIX6 With Retinal Nerve Fiber Layer Thickness in Individuals of European Descent. *Am J Ophthalmol*. 2015;160(1):123-30 e1
- 181.** Sang J, Jia L, Zhao B, Wang H, Zhang N, Wang N. Association of three single nucleotide polymorphisms at the SIX1-SIX6 locus with primary open angle glaucoma in the Chinese population. *Sci China Life Sci*. 2016;59(7):694-9
- 182.** Kondkar AA, Azad TA, Almobarak FA, Kalantan H, Sultan T, Alsabaani NA, Al-Obeidan SA, Abu-Amero KK. Polymorphism rs10483727 in the SIX1/SIX6 Gene Locus Is a Risk Factor for Primary Open Angle Glaucoma in a Saudi Cohort. *Genet Test Mol Biomarkers*. 2018;22(1):74-8
- 183.** Rong SS, Lu SY, Matsushita K, Huang C, Leung CKS, Kawashima R, Usui S, Tam POS, Young AL, Tsujikawa M, et al. Association of the SIX6 locus with primary open angle glaucoma in southern Chinese and Japanese. *Exp Eye Res*. 2018;180:129-36
- 184.** Writing Committee for the Normal Tension Glaucoma Genetic Study Group of Japan Glaucoma S, Meguro A, Inoko H, Ota M, Mizuki N, Bahram S. Genome-wide association study of normal tension glaucoma: common variants in SRBD1 and ELOVL5 contribute to disease susceptibility. *Ophthalmology*. 2010;117(7):1331-8 e5
- 185.** Mabuchi F, Sakurada Y, Kashiwagi K, Yamagata Z, Iijima H, Tsukahara S. Association between SRBD1 and ELOVL5 gene polymorphisms and primary open-angle glaucoma. *Invest Ophthalmol Vis Sci*. 2011;52(7):4626-9
- 186.** Takano Y, Shi D, Shimizu A, Funayama T, Mashima Y, Yasuda N, Fukuchi T, Abe H, Ideta H, Zheng X, et al. Association of Toll-like receptor 4 gene polymorphisms in Japanese subjects with primary open-angle, normal-tension, and exfoliation glaucoma. *Am J Ophthalmol*. 2012;154(5):825-32 e1
- 187.** Navarro-Partida J, Alvarado Castillo B, Martinez-Rizo AB, Rosales-Diaz R, Velazquez-Fernandez JB, Santos A. Association of single-nucleotide polymorphisms in non-coding regions of the TLR4 gene with primary open angle glaucoma in a Mexican population. *Ophthalmic Genet*. 2017;38(4):325-9

- 188.** Shibuya E, Meguro A, Ota M, Kashiwagi K, Mabuchi F, Iijima H, Kawase K, Yamamoto T, Nakamura M, Negi A, et al. Association of Toll-like receptor 4 gene polymorphisms with normal tension glaucoma. *Invest Ophthalmol Vis Sci.* 2008;49(10):4453-7
- 189.** Navarro-Partida J, Martinez-Rizo AB, Ramirez-Barrera P, Velazquez-Fernandez JB, Mondragon-Jaimes VA, Santos-Garcia A, Benites-Godinez V. Association of Toll-like receptor 4 single-nucleotide polymorphisms Asp299Gly and Thr399Ile with the risk of primary open angle glaucoma. *Graefes Arch Clin Exp Ophthalmol.* 2017;255(5):995-1001
- 190.** Abu-Amero KK, Kondkar AA, Mousa A, Azad TA, Sultan T, Osman EA, Al-Obeidan SA. Analysis of toll-like receptor rs4986790 polymorphism in Saudi patients with primary open angle glaucoma. *Ophthalmic Genet.* 2016:1-5
- 191.** Mousa A, Kondkar AA, Al-Obeidan SA, Azad TA, Sultan T, Osman EA, Abu-Amero KK. Lack of Association Between Polymorphism rs4986791 in TLR4 and Primary Open-Angle Glaucoma in a Saudi Cohort. *Genet Test Mol Biomarkers.* 2016;20(9):556-9
- 192.** Suh W, Kim S, Ki CS, Kee C. Toll-like receptor 4 gene polymorphisms do not associate with normal tension glaucoma in a Korean population. *Mol Vis.* 2011;17:2343-8
- 193.** Chen Y, Hughes G, Chen X, Qian S, Cao W, Wang L, Wang M, Sun X. Genetic Variants Associated With Different Risks for High Tension Glaucoma and Normal Tension Glaucoma in a Chinese Population. *Invest Ophthalmol Vis Sci.* 2015;56(4):2595-600
- 194.** Sharma S, Burdon KP, Chidlow G, Klebe S, Crawford A, Dimasi DP, Dave A, Martin S, Javadiyan S, Wood JP, et al. Association of genetic variants in the TMCO1 gene with clinical parameters related to glaucoma and characterization of the protein in the eye. *Invest Ophthalmol Vis Sci.* 2012;53(8):4917-25
- 195.** Ozel AB, Moroi SE, Reed DM, Nika M, Schmidt CM, Akbari S, Scott K, Rozsa F, Pawar H, Musch DC, et al. Genome-wide association study and meta-analysis of intraocular pressure. *Hum Genet.* 2014;133(1):41-57
- 196.** Kondkar AA, Mousa A, Azad TA, Sultan T, Alawad A, Altuwaijri S, Al-Obeidan SA, Abu-Amero KK. Polymorphism rs755523 in transmembrane and coiled-coil domain 1 (TMCO1) is not a risk factor for primary open angle glaucoma in a Saudi cohort. *J Negat Results Biomed.* 2016;15(1):17
- 197.** Bozkurt B, Mesci L, Irkec M, Ozdag BB, Sanal O, Arslan U, Ersoy F, Tezcan I. Association of tumour necrosis factor-alpha -308 G/A polymorphism with primary open-angle glaucoma. *Clin Experiment Ophthalmol.* 2012;40(4):e156-62
- 198.** Lin HJ, Tsai FJ, Chen WC, Shi YR, Hsu Y, Tsai SW. Association of tumour necrosis factor alpha -308 gene polymorphism with primary open-angle glaucoma in Chinese. *Eye (Lond).* 2003;17(1):31-4
- 199.** Razeghinejad MR, Rahat F, Kamali-Sarvestani E. Association of TNFA -308 G/A and TNFRI +36 A/G gene polymorphisms with glaucoma. *Ophthalmic Res.* 2009;42(3):118-24
- 200.** Xin X, Gao L, Wu T, Sun F. Roles of tumor necrosis factor alpha gene polymorphisms, tumor necrosis factor alpha level in aqueous humor, and the risks of open angle glaucoma: a meta-analysis. *Mol Vis.* 2013;19:526-35
- 201.** Hamid MA, Moemen L, Labib H, Helmy H, Elsergany T. Risk of open angle glaucoma due to tumor necrosis factor alpha gene polymorphisms. *Electron Physician.* 2016;8(2):1978-83
- 202.** Tikunova E, Ovtcharova V, Reshetnikov E, Dvornyk V, Polonikov A, Bushueva O, Churnosov M. Genes of tumor necrosis factors and their receptors and the primary open angle glaucoma in the population of Central Russia. *Int J Ophthalmol.* 2017;10(10):1490-4
- 203.** Mossbock G, Weger M, Moray M, Renner W, Haller-Schober EM, Mattes D, Schmut O, Wegscheider B, El-Shabrawi Y. TNF-alpha promoter polymorphisms and primary open-angle glaucoma. *Eye (Lond).* 2006;20(9):1040-3
- 204.** Lee YH, Song GG. TNF-alpha -308 A/G and -238 A/G polymorphisms and susceptibility to glaucoma: a meta-analysis. *Genet Mol Res.* 2015;14(2):4966-77

- 205.** Wang CY, Shen YC, Wei LC, Lin KH, Feng SC, Yang YY, Chiu CH, Tsai HY. Polymorphism in the TNF-alpha(-863) locus associated with reduced risk of primary open angle glaucoma. *Mol Vis.* 2012;18:779-85
- 206.** Guo Y, Zhang H, Chen X, Yang X, Cheng W, Zhao K. Association of TP53 polymorphisms with primary open-angle glaucoma: a meta-analysis. *Invest Ophthalmol Vis Sci.* 2012;53(7):3756-63
- 207.** Nowak A, Przybylowska-Sygut K, Szymanek K, Szaflik J, Szaflik J, Majsterek I. The relationship of TP53 and GRIN2B gene polymorphisms with risk of occurrence and progression of primary open-angle glaucoma in a Polish population. *Pol J Pathol.* 2014;65(4):313-21
- 208.** Gupta S, Chatterjee S, Chandra A, Maurya OPS, Mishra RN, Mukherjee A, Mutsuddi M. TP53 codon 72 polymorphism and the risk of glaucoma in a north Indian cohort: A genetic association study. *Ophthalmic Genet.* 2018;39(2):228-35
- 209.** Fan BJ, Chen X, Sondhi N, Sharmila PF, Soumittra N, Sripriya S, Sacikala S, Asokan R, Friedman DS, Pasquale LR, et al. Family-Based Genome-Wide Association Study of South Indian Pedigrees Supports WNT7B as a Central Corneal Thickness Locus. *Invest Ophthalmol Vis Sci.* 2018;59(6):2495-502
- 210.** Lu Y, Dimasi DP, Hysi PG, Hewitt AW, Burdon KP, Toh T, Ruddle JB, Li YJ, Mitchell P, Healey PR, et al. Common genetic variants near the Brittle Cornea Syndrome locus ZNF469 influence the blinding disease risk factor central corneal thickness. *PLoS Genet.* 2010;6(5):e1000947
- 211.** Azad TA, Edward NB, Kondkar AA, Kalantan H, Altuwaijri S, Sultan T, Al-Mobarak FA, Al-Obeidan SA, Abu-Amero KK. Polymorphism rs547984 on human chromosome 1q43 is not associated with primary open angle glaucoma in a Saudi cohort. *J Negat Results Biomed.* 2017;16(1):12
- 212.** Kondkar AA, Edward NB, Kalantan H, Al-Kharashi AS, Altuwaijri S, Mohamed G, Sultan T, Azad TA, Abu-Amero KK. Lack of association between polymorphism rs540782 and primary open angle glaucoma in Saudi patients. *J Negat Results Biomed.* 2017;16(1):3
- 213.** Liu H, Yang ZK, Li Y, Zhang WJ, Wang YT, Duan XC. ABCB1 variants confer susceptibility to primary open-angle glaucoma and predict individual differences to latanoprost treatment. *Biomed Pharmacother.* 2016;80:115-20
- 214.** Inagaki Y, Mashima Y, Fuse N, Funayama T, Ohtake Y, Yasuda N, Murakami A, Hotta Y, Fukuchi T, Tsubota K. Polymorphism of beta-adrenergic receptors and susceptibility to open-angle glaucoma. *Mol Vis.* 2006;12:673-80
- 215.** Hashizume K, Mashima Y, Fumayama T, Ohtake Y, Kimura I, Yoshida K, Ishikawa K, Yasuda N, Fujimaki T, Asaoka R, et al. Genetic polymorphisms in the angiotensin II receptor gene and their association with open-angle glaucoma in a Japanese population. *Invest Ophthalmol Vis Sci.* 2005;46(6):1993-2001
- 216.** Buentello-Volante B, Elizondo-Olascoaga C, Miranda-Duarte A, Guadarrama-Vallejo D, Cabral-Macias J, Zenteno JC. Association study of multiple gene polymorphisms with the risk of adult-onset primary open-angle glaucoma in a Mexican population. *Exp Eye Res.* 2013;107:59-64
- 217.** Cuchra M, Szaflik JP, Przybylowska-Sygut K, Gacek M, Kaminska A, Szaflik J, Majsterek I. The role of the 148 Asp/Glu polymorphism of the APE1 gene in the development and progression of primary open angle glaucoma development in the Polish population. *Pol J Pathol.* 2013;64(4):296-302
- 218.** Nowak A, Szaflik JP, Gacek M, Przybylowska-Sygut K, Kaminska A, Szaflik J, Majsterek I. BDNF and HSP gene polymorphisms and their influence on the progression of primary open-angle glaucoma in a Polish population. *Arch Med Sci.* 2014;10(6):1206-13
- 219.** Carbone MA, Chen Y, Hughes GA, Weinreb RN, Zabriskie NA, Zhang K, Anholt RR. Genes of the unfolded protein response pathway harbor risk alleles for primary open angle glaucoma. *PLoS One.* 2011;6(5):e20649
- 220.** Ayub H, Micheal S, Akhtar F, Khan MI, Bashir S, Waheed NK, Ali M, Schoenmaker-Koller FE, Shafique S, Qamar R, et al. Association of a polymorphism in the BIRC6 gene with pseudoexfoliative glaucoma. *PLoS One.* 2014;9(8):e105023

- 221.** Fang Kho P, Lea RA, Benton MC, Eccles D, Haupt LM, Hewitt AW, Sherwin JC, Mackey DA, Griffiths LR. Expression QTL analysis of glaucoma endophenotypes in the Norfolk Island isolate provides evidence that immune-related genes are associated with optic disc size. *J Hum Genet.* 2018;63(1):83-7
- 222.** Liu T, Xie L, Ye J, He X. Family-based analysis identified CD2 as a susceptibility gene for primary open angle glaucoma in Chinese Han population. *J Cell Mol Med.* 2014;18(4):600-9
- 223.** Lin HJ, Tsai FJ, Hung P, Chen WC, Chen HY, Fan SS, Tsai SW. Association of E-cadherin gene 3'-UTR C/T polymorphism with primary open angle glaucoma. *Ophthalmic Res.* 2006;38(1):44-8
- 224.** Kaurani L, Vishal M, Kumar D, Sharma A, Mehani B, Sharma C, Chakraborty S, Jha P, Ray J, Sen A, et al. Gene-rich large deletions are overrepresented in POAG patients of Indian and Caucasian origins. *Invest Ophthalmol Vis Sci.* 2014;55(5):3258-64
- 225.** Collins DW, Gudiseva HV, Chavali VRM, Trachtman B, Ramakrishnan M, Merritt WT, III, Pistilli M, Rossi RA, Blachon S, Sankar PS, et al. The MT-CO1 V83I Polymorphism is a Risk Factor for Primary Open-Angle Glaucoma in African American Men. *Invest Ophthalmol Vis Sci.* 2018;59(5):1751-9
- 226.** Jeoung JW, Seong MW, Park SS, Kim DM, Kim SH, Park KH. Mitochondrial DNA variant discovery in normal-tension glaucoma patients by next-generation sequencing. *Invest Ophthalmol Vis Sci.* 2014;55(2):986-92
- 227.** Costa NB, Silva CT, Frare AB, Silva RE, Moura KK. Association between CYP1A1m1 gene polymorphism and primary open-angle glaucoma. *Genet Mol Res.* 2014;13(4):10382-9
- 228.** Furgeux C, Martine L, Bjorkhem I, Diczfalusy U, Joffe C, Acar N, Creuzot-Garcher C, Bron A, Bretillon L. Primary open-angle glaucoma: association with cholesterol 24S-hydroxylase (CYP46A1) gene polymorphism and plasma 24-hydroxycholesterol levels. *Invest Ophthalmol Vis Sci.* 2009;50(12):5712-7
- 229.** Chandra A, Abbas S, Raza ST, Singh L, Rizvi S, Mahdi F. Polymorphism of CYP46A1 and PPARgamma2 Genes in Risk Prediction of Primary Open Angle Glaucoma Among North Indian Population. *Middle East Afr J Ophthalmol.* 2016;23(2):172-6
- 230.** Mossbock G, Weger M, Faschinger C, Schmut O, Renner W, Wedrich A, Zimmermann C, El-Shabrawi Y. Role of cholesterol 24S-hydroxylase gene polymorphism (rs754203) in primary open angle glaucoma. *Mol Vis.* 2011;17:616-20
- 231.** Ishikawa K, Funayama T, Ohtake Y, Kimura I, Ideta H, Nakamoto K, Yasuda N, Fukuchi T, Fujimaki T, Murakami A, et al. Association between glaucoma and gene polymorphism of endothelin type A receptor. *Mol Vis.* 2005;11:431-7
- 232.** Mabuchi F, Sakurada Y, Kashiwagi K, Yamagata Z, Iijima H, Tsukahara S. Involvement of genetic variants associated with primary open-angle glaucoma in pathogenic mechanisms and family history of glaucoma. *Am J Ophthalmol.* 2015;159(3):437-44 e2
- 233.** Mabuchi F, Sakurada Y, Kashiwagi K, Yamagata Z, Iijima H, Tsukahara S. Estrogen receptor beta gene polymorphism and intraocular pressure elevation in female patients with primary open-angle glaucoma. *Am J Ophthalmol.* 2010;149(5):826-30 e1-2
- 234.** Liu Y, Gibson J, Wheeler J, Kwee LC, Santiago-Turla CM, Akafo SK, Lichter PR, Gaasterland DE, Moroi SE, Challa P, et al. GALC deletions increase the risk of primary open-angle glaucoma: the role of Mendelian variants in complex disease. *PLoS One.* 2011;6(11):e27134
- 235.** Shin HY, Park SW, Jung SH, Park HY, Jung KI, Chung YJ, Park CK. No Evidence of Association of Heterozygous Galactosylceramidase Deletion With Normal-Tension Glaucoma in a Korean Population. *J Glaucoma.* 2016;25(5):e504-6
- 236.** Nakamura K, Ota M, Meguro A, Nomura N, Kashiwagi K, Mabuchi F, Iijima H, Kawase K, Yamamoto T, Nakamura M, et al. Association of microsatellite polymorphisms of the GPDS1 locus with normal tension glaucoma in the Japanese population. *Clin Ophthalmol.* 2009;3:307-12
- 237.** Malinowska K, Kowalski M, Szaflik J, Szaflik JP, Majsterek I. The role of Cat -262C/T, GPX1 Pro198Leu and Sod1+35A/C gene polymorphisms in a development of primary open-angle glaucoma in a Polish population. *Pol J Pathol.* 2016;67(4):404-10

- 238.** Silva CT, Costa NB, Silva KS, Silva RE, Moura KK. Association between primary open angle glaucoma and genetic polymorphisms GSTM1/GSTT1 in patients from Goiania Central-West Region of Brazil. *Genet Mol Res.* 2014;13(4):8870-5
- 239.** Lu Y, Shi Y, Yin J, Huang Z. Are glutathione S-transferase polymorphisms (GSTM1, GSTT1) associated with primary open angle glaucoma? A meta-analysis. *Gene.* 2013;527(1):311-5
- 240.** Basu K, Sen A, Ray K, Ghosh I, Datta K, Mukhopadhyay A. Genetic association and gene-gene interaction of HAS2, HABP1 and HYAL3 implicate hyaluronan metabolic genes in glaucomatous neurodegeneration. *Dis Markers.* 2012;33(3):145-54
- 241.** Shi D, Funayama T, Mashima Y, Takano Y, Shimizu A, Yamamoto K, Mengkegale M, Miyazawa A, Yasuda N, Fukuchi T, et al. Association of HK2 and NCK2 with normal tension glaucoma in the Japanese population. *PLoS One.* 2013;8(1):e54115
- 242.** Tosaka K, Mashima Y, Funayama T, Ohtake Y, Kimura I, Glaucoma Gene Research G. Association between open-angle glaucoma and gene polymorphism for heat-shock protein 70-1. *Jpn J Ophthalmol.* 2007;51(6):417-23
- 243.** Tsai FJ, Lin HJ, Chen WC, Chen HY, Fan SS. Insulin-like growth factor-II gene polymorphism is associated with primary open angle glaucoma. *J Clin Lab Anal.* 2003;17(6):259-63
- 244.** Wang CY, Shen YC, Lo FY, Su CH, Lee SH, Lin KH, Tsai HY, Kuo NW, Fan SS. Polymorphism in the IL-1alpha (-889) locus associated with elevated risk of primary open angle glaucoma. *Mol Vis.* 2006;12:1380-5
- 245.** How AC, Aung T, Chew X, Yong VH, Lim MC, Lee KY, Toh JY, Li Y, Liu J, Vithana EN. Lack of association between interleukin-1 gene cluster polymorphisms and glaucoma in Chinese subjects. *Invest Ophthalmol Vis Sci.* 2007;48(5):2123-6
- 246.** Li J, Feng Y, Sung MS, Lee TH, Park SW. Association of Interleukin-1 gene clusters polymorphisms with primary open-angle glaucoma: a meta-analysis. *BMC Ophthalmol.* 2017;17(1):218
- 247.** Oliveira MB, de Vasconcellos JPC, Ananina G, Costa VP, de Melo MB. Association between IL1A and IL1B polymorphisms and primary open angle glaucoma in a Brazilian population. *Exp Biol Med (Maywood).* 2018;243(13):1083-91
- 248.** Park S, Jamshidi Y, Vaideanu D, Bitner-Glindzicz M, Fraser S, Sowden JC. Genetic risk for primary open-angle glaucoma determined by LMX1B haplotypes. *Invest Ophthalmol Vis Sci.* 2009;50(4):1522-30
- 249.** Wu M, Zhu XY, Ye J. Associations of polymorphisms of LOXL1 gene with primary open-angle glaucoma: a meta-analysis based on 5,293 subjects. *Mol Vis.* 2015;21:165-72
- 250.** Zanon-Moreno V, Zanon-Moreno L, Ortega-Azorin C, Asensio-Marquez EM, Garcia-Medina JJ, Sanz P, Pinazo-Duran MD, Ordoñas JM, Corella D. Genetic polymorphism related to exfoliative glaucoma is also associated with primary open-angle glaucoma risk. *Clin Experiment Ophthalmol.* 2015;43(1):26-30
- 251.** Sun W, Sheng Y, Weng Y, Xu CX, Williams SE, Liu YT, Hauser MA, Allingham RR, Jin MJ, Chen GD. Lack of association between lysyl oxidase-like 1 polymorphisms and primary open angle glaucoma: a meta-analysis. *Int J Ophthalmol.* 2014;7(3):550-6
- 252.** Anastasopoulos E, Coleman AL, Wilson MR, Sinsheimer JS, Yu F, Katafigiotis S, Founti P, Salonikiou A, Pappas T, Koskosas A, et al. Association of LOXL1 polymorphisms with pseudoexfoliation, glaucoma, intraocular pressure, and systemic diseases in a Greek population. The Thessaloniki eye study. *Invest Ophthalmol Vis Sci.* 2014;55(7):4238-43
- 253.** Chen H, Chen LJ, Zhang M, Gong W, Tam PO, Lam DS, Pang CP. Ethnicity-based subgroup meta-analysis of the association of LOXL1 polymorphisms with glaucoma. *Mol Vis.* 2010;16:167-77
- 254.** Kasim B, Irkeç M, Alikasifoglu M, Orhan M, Mocan MC, Aktas D. Association of LOXL1 gene polymorphisms with exfoliation syndrome/glaucoma and primary open angle glaucoma in a Turkish population. *Mol Vis.* 2013;19:114-20
- 255.** Vishal M, Sharma A, Kaurani L, Alfano G, Mookherjee S, Narta K, Agrawal J, Bhattacharya I, Roychoudhury S, Ray J, et al. Genetic association and stress mediated down-regulation in trabecular

meshwork implicates MPP7 as a novel candidate gene in primary open angle glaucoma. *BMC Med Genomics*. 2016;9:15

**256.** Kaminska A, Banas-Lezanska P, Przybylowska K, Gacek M, Majsterek I, Szaflik J, Szaflik JP. The protective role of the -735C/T and the -1306C/T polymorphisms of the MMP-2 gene in the development of primary open-angle glaucoma. *Ophthalmic Genet*. 2014;35(1):41-6

**257.** Ghanbari M, Iglesias AI, Springelkamp H, van Duijn CM, Ikram MA, Dehghan A, Erkeland SJ, Klaver CCW, Meester-Smoor MA, International Glaucoma Genetics C. A Genome-Wide Scan for MicroRNA-Related Genetic Variants Associated With Primary Open-Angle Glaucoma. *Invest Ophthalmol Vis Sci*. 2017;58(12):5368-77

**258.** Chatzikiyriakidou A, Founti P, Melidou A, Minti F, Bouras E, Anastasopoulos E, Pappas T, Haidich AB, Lambropoulos A, Topouzis F. MicroRNA-related polymorphisms in pseudoexfoliation syndrome, pseudoexfoliative glaucoma, and primary open-angle glaucoma. *Ophthalmic Genet*. 2018;39(5):603-9

**259.** Junemann AG, von Ahsen N, Reulbach U, Roedl J, Bonsch D, Kornhuber J, Kruse FE, Bleich S. C677T variant in the methylenetetrahydrofolate reductase gene is a genetic risk factor for primary open-angle glaucoma. *Am J Ophthalmol*. 2005;139(4):721-3

**260.** Gupta S, Bhaskar PK, Bhardwaj R, Chandra A, Chaudhry VN, Chaudhry P, Ali A, Mukherjee A, Mutsuddi M. MTHFR C677T predisposes to POAG but not to PACG in a North Indian population: a case control study. *PLoS One*. 2014;9(7):e103063

**261.** Al-Shahrani H, Al-Dabbagh N, Al-Dohayan N, Arfin M, Al-Asmari M, Rizvi S, Al-Asmari A. Association of the methylenetetrahydrofolate reductase (MTHFR) C677T polymorphism with primary glaucoma in Saudi population. *BMC Ophthalmol*. 2016;16(1):156

**262.** Zhao R, Yin D, Wang E, Si B. The effect of MTHFR ala222val polymorphism on open-angle glaucoma: a meta-analysis. *Ophthalmic Genet*. 2015;36(1):27-30

**263.** Abu-Amero KK, Morales J, Bosley TM. Mitochondrial abnormalities in patients with primary open-angle glaucoma. *Invest Ophthalmol Vis Sci*. 2006;47(6):2533-41

**264.** Banerjee D, Banerjee A, Mookherjee S, Vishal M, Mukhopadhyay A, Sen A, Basu A, Ray K. Mitochondrial genome analysis of primary open angle glaucoma patients. *PLoS One*. 2013;8(8):e70760

**265.** Sundaresan P, Simpson DA, Sambare C, Duffy S, Lechner J, Dastane A, Dervan EW, Vallabh N, Chelarker V, Deshpande M, et al. Whole-mitochondrial genome sequencing in primary open-angle glaucoma using massively parallel sequencing identifies novel and known pathogenic variants. *Genet Med*. 2015;17(4):279-84

**266.** Akiyama M, Yatsu K, Ota M, Katsuyama Y, Kashiwagi K, Mabuchi F, Iijima H, Kawase K, Yamamoto T, Nakamura M, et al. Microsatellite analysis of the GLC1B locus on chromosome 2 points to NCK2 as a new candidate gene for normal tension glaucoma. *Br J Ophthalmol*. 2008;92(9):1293-6

**267.** Funayama T, Mashima Y, Ohtake Y, Ishikawa K, Fuse N, Yasuda N, Fukuchi T, Murakami A, Hotta Y, Shimada N, et al. SNPs and interaction analyses of noelin 2, myocilin, and optineurin genes in Japanese patients with open-angle glaucoma. *Invest Ophthalmol Vis Sci*. 2006;47(12):5368-75

**268.** Acharya M, Mookherjee S, Bhattacharjee A, Thakur SK, Bandyopadhyay AK, Sen A, Chakrabarti S, Ray K. Evaluation of the OPTC gene in primary open angle glaucoma: functional significance of a silent change. *BMC Mol Biol*. 2007;8:21

**269.** Inagaki Y, Mashima Y, Funayama T, Ohtake Y, Fuse N, Yasuda N, Fukuchi T, Murakami A, Hotta Y. Paraoxonase 1 gene polymorphisms influence clinical features of open-angle glaucoma. *Graefes Arch Clin Exp Ophthalmol*. 2006;244(8):984-90

**270.** Zhou G, Liu B. Single nucleotide polymorphisms of metabolic syndrome-related genes in primary open angle glaucoma. *Int J Ophthalmol*. 2010;3(1):36-42

**271.** Nag A, Venturini C, Hysi PG, Arno M, Aldecoa-Otalora Astarloa E, Macgregor S, Hewitt AW, Young TL, Mitchell P, Viswanathan AC, et al. Copy number variation at chromosome 5q21.2 is associated with intraocular pressure. *Invest Ophthalmol Vis Sci*. 2013;54(5):3607-12

- 272.** Saracaloglu A, Demiryurek S, Okumus S, Oztuzcu S, Bozgeyik I, Coskun E, Aksoy U, Kaydu E, Erbagci I, Gurler B, et al. Toward Novel Diagnostics for Primary Open-Angle Glaucoma? An Association Study of Polymorphic Variation in Ras Homolog Family Member (A, B, C, D) Genes RHOA, RHOB, RHOC, and RHOD. *OMICS*. 2016;20(5):290-5
- 273.** Fernandez-Martinez L, Letteboer S, Mardin CY, Weisschuh N, Gramer E, Weber BH, Rautenstrauss B, Ferreira PA, Kruse FE, Reis A, et al. Evidence for RPGRIP1 gene as risk factor for primary open angle glaucoma. *Eur J Hum Genet*. 2011;19(4):445-51
- 274.** Zanon-Moreno V, Asensio-Marquez EM, Ciancotti-Oliver L, Garcia-Medina JJ, Sanz P, Ortega-Azorin C, Pinazo-Duran MD, Ordovas JM, Corella D. Effects of polymorphisms in vitamin E-, vitamin C-, and glutathione peroxidase-related genes on serum biomarkers and associations with glaucoma. *Mol Vis*. 2013;19:231-42
- 275.** Fujikawa K, Iwata T, Inoue K, Akahori M, Kadotani H, Fukaya M, Watanabe M, Chang Q, Barnett EM, Swat W. VAV2 and VAV3 as candidate disease genes for spontaneous glaucoma in mice and humans. *PLoS One*. 2010;5(2):e9050
- 276.** Lv Y, Yao Q, Ma W, Liu H, Ji J, Li X. Associations of vitamin D deficiency and vitamin D receptor (Cdx-2, Fok I, Bsm I and Taq I) polymorphisms with the risk of primary open-angle glaucoma. *BMC Ophthalmol*. 2016;16(1):116
- 277.** Lin HJ, Chen WL, Chen TH, Kung YJ, Wan L. Vascular Endothelial Growth Factor -460 C/T BstUI Gene Polymorphism is associated with Primary Open Angle Glaucoma. *Biomedicine (Taipei)*. 2014;4:4
- 278.** Yousaf S, Khan MI, Micheal S, Akhtar F, Ali SH, Riaz M, Ali M, Lall P, Waheed NK, den Hollander AI, et al. XRCC1 and XPD DNA repair gene polymorphisms: a potential risk factor for glaucoma in the Pakistani population. *Mol Vis*. 2011;17:1153-63
- 279.** Szaflik JP, Cuchra M, Przybylowska-Sygut K, Dziki L, Kurowska AK, Gacek M, Drzewoski J, Szaflik J, Majsterek I. Association of the 399Arg/Gln XRCC1, the 194 Arg/Trp XRCC1, the 326Ser/Cys OGG1, and the 324Gln/His MUTYH gene polymorphisms with clinical parameters and the risk for development of primary open-angle glaucoma. *Mutat Res*. 2013;753(1):12-22
- 280.** Cuchra M, Markiewicz L, Mucha B, Pytel D, Szymanek K, Szemraj J, Szaflik J, Szaflik JP, Majsterek I. The role of base excision repair in the development of primary open angle glaucoma in the Polish population. *Mutat Res*. 2015;778:26-40
- 281.** Guven M, Unal M, Batar B, Eroglu E, Devarnoglou K, Tamcelik N, Ucar D, Sarici A. Polymorphisms of DNA repair genes XRCC1 and XPD and risk of primary open angle glaucoma (POAG). *Mol Vis*. 2007;13:12-7
