# Supplementary material
Source: publisher figshare collection journal article supplement (https://tandf.figshare.com/articles/dataset/_/8068571)
Supplement: Supplementary file 2 [file 2]

*Supplemental figure 1: In situ hybridization staining (red dots) of the negative control DapB (A) and positive control Polr2a (B) transcripts in the retina of albino mice. Scale bar 25  $\mu$ m.*
