# Supplementary material
Source: publisher figshare collection journal article supplement (https://tandf.figshare.com/articles/dataset/_/8068571)
Supplement: Supplementary file 3 [file 2]

Supplemental table 1: Number of slides assessed for in-situ hybridization scoring. Scores are given on a 0-3 scale as described in methods. n: number of animals; SD: standard deviation; TM: trabecular meshwork; PE: pigmented epithelium; NPE: non-pigmented epithelium; GCL: ganglion cell layer; INL: inner nuclear layer; ONL: outer nuclear layer; RPE: retinal pigmented epithelium; ONH: optic nerve head

| <i>Tnf</i>   |             | pigmented n=6 (ONH: n=2) |               |      | Albino n=4 |               |      | p-value | average rounded |
|--------------|-------------|--------------------------|---------------|------|------------|---------------|------|---------|-----------------|
|              |             | slides                   | average score | (SD) | slides     | average score | (SD) |         |                 |
| Cornea       | Epithelium  | 23                       | 0,87          | 0,46 | 14         | 1,00          | 0,78 | 0,53    | 1               |
|              | Stroma      | 21                       | 0,00          | 0,00 | 14         | 0,00          | 0,00 | #DIV/0! | 0               |
|              | Endothelium | 21                       | 0,00          | 0,00 | 11         | 0,00          | 0,00 | #DIV/0! | 0               |
| TM           | TM          | 15                       | 0,07          | 0,26 | 12         | 0,17          | 0,39 | 0,43    | 0               |
| Ciliary body | PE          | 0                        | N/A           | N/A  | 15         | 0,33          | 0,49 | N/A     | 0               |
|              | NPE         | 22                       | 0,05          | 0,21 | 15         | 0,20          | 0,41 | 0,14    | 0               |
| Iris         | Iris        | 0                        | N/A           | N/A  | 14         | 0,07          | 0,27 | N/A     | 0               |
| Lens         | Lens        | 22                       | 0,05          | 0,21 | 14         | 0,07          | 0,27 | 0,75    | 0               |
| Retina       | GCL         | 24                       | 0,05          | 0,20 | 15         | 0,20          | 0,41 | 0,12    | 0               |
|              | INL         | 24                       | 0,60          | 0,49 | 15         | 0,87          | 0,52 | 0,15    | 1               |
|              | ONL         | 24                       | 0,70          | 0,75 | 15         | 1,07          | 0,59 | 0,13    | 1               |
|              | segment     | 24                       | 0,00          | 0    | 15         | 0,00          | 0,00 | #DIV/0! | 0               |
|              | RPE         | 0                        | N/A           | N/A  | 14         | 0,00          | 0,00 | N/A     | 0               |
| Choroid      | Choroid     | 15                       | 0,07          | 0,26 | 13         | 0,17          | 0,39 | 0,43    | 0               |
| ONH          | ONH         | 10                       | 0,10          | 0,32 | N/A        | N/A           | N/A  | N/A     | 0               |
| Sclera       | Sclera      | 15                       | 0,06          | 0,26 | 13         | 0,15          | 0,38 | 0,48    | 0               |

| <i>Tgfb<math>\beta</math>3</i> |             | pigmented n=6 (ONH: n=2) |               |      | albino n=3 (ONH: n=0) |               |      | p-value  | average rounded |
|--------------------------------|-------------|--------------------------|---------------|------|-----------------------|---------------|------|----------|-----------------|
|                                |             | slides                   | average score | (SD) | slides                | average score | (SD) |          |                 |
| Cornea                         | Epithelium  | 23                       | 3             | 0    | 16                    | 2,94          | 0,25 | 0,235431 | 3               |
|                                | Stroma      | 23                       | 2,70          | 0,47 | 16                    | 2,81          | 0,40 | 0,424435 | 3               |
|                                | Endothelium | 23                       | 2,96          | 0,21 | 16                    | 3,00          | 0,00 | 0,4115   | 3               |
| TM                             | TM          | 22                       | 2,86          | 0,35 | 13                    | 3,00          | 0,00 | 0,173485 | 3               |
| Ciliary body                   | PE          | 0                        | N/A           | N/A  | 17                    | 3,00          | 0,00 | N/A      | 3               |
|                                | NPE         | 24                       | 2,88          | 0,34 | 17                    | 3,00          | 0,00 | 0,136602 | 3               |
| Iris                           | Iris        | 0                        | N/A           | N/A  | 16                    | 3,00          | 0,00 | N/A      | 3               |
| Lens                           | Lens        | 21                       | 2,67          | 0,66 | 10                    | 2,90          | 0,32 | 0,299075 | 3               |
| Retina                         | GCL         | 23                       | 2,13          | 0,87 | 14                    | 2,21          | 0,70 | 0,761892 | 2               |
|                                | INL         | 23                       | 2,35          | 0,83 | 16                    | 2,38          | 0,62 | 0,912307 | 2               |
|                                | ONL         | 23                       | 0,57          | 0,73 | 16                    | 0,94          | 0,57 | 0,096046 | 1               |
|                                | segment     | 23                       | 0,00          | 0,00 | 16                    | 0,00          | 0,00 | #DIV/0!  | 0               |
|                                | RPE         | 0                        | N/A           | N/A  | 15                    | 3,00          | 0,00 | N/A      | 3               |
| Choroid                        | Choroid     | 21                       | 2,81          | 0,40 | 13                    | 3,00          | 0,00 | 0,12089  | 3               |
| ONH                            | ONH         | 7                        | 2,29          | 0,49 | 0                     | N/A           | N/A  | N/A      | 2               |
| Sclera                         | Sclera      | 21                       | 2,95          | 0,22 | 13                    | 2,92          | 0,28 | 0,733844 | 3               |

Supplemental table 1: Continued

| <i>F5</i>    |             | pigmented n=6 (ONH: n=2) |               |      | albino n=4 (ONH: n=0) |               |      | p-value  | average rounded |
|--------------|-------------|--------------------------|---------------|------|-----------------------|---------------|------|----------|-----------------|
|              |             | slides                   | average score | (SD) | slides                | average score | (SD) |          |                 |
| Cornea       | Epithelium  | 22                       | 0,32          | 0,48 | 14                    | 0,36          | 0,50 | 0,815521 | 0               |
|              | Stroma      | 22                       | 0,05          | 0,21 | 14                    | 0,14          | 0,36 | 0,316388 | 0               |
|              | Endothelium | 21                       | 0,00          | 0,00 | 13                    | 0,00          | 0,00 | #DIV/0!  | 0               |
| TM           | TM          | 20                       | 0,15          | 0,37 | 13                    | 0,23          | 0,44 | 0,570966 | 0               |
| Ciliary body | PE          | 0                        | N/A           | N/A  | 16                    | 0,06          | 0,25 | N/A      | 0               |
|              | NPE         | 24                       | 2,92          | 0,28 | 16                    | 3,00          | 0,00 | 0,247104 | 3               |
| Iris         | Iris        | 0                        | N/A           | N/A  | 16                    | 0,94          | 0,57 | N/A      | 1               |
| Lens         | Lens        | 22                       | 0,00          | 0,00 | 15                    | 0,07          | 0,26 | 0,230916 | 0               |
| Retina       | GCL         | 24                       | 0,17          | 0,38 | 16                    | 0,13          | 0,34 | 0,726059 | 0               |
|              | INL         | 24                       | 0,75          | 0,53 | 16                    | 1,00          | 0,52 | 0,148832 | 1               |
|              | ONL         | 24                       | 0,75          | 0,61 | 16                    | 1,00          | 0,52 | 0,184826 | 1               |
|              | segment     | 24                       | 0,00          | 0,00 | 16                    | 0,00          | 0,00 | #DIV/0!  | 0               |
|              | RPE         | 0                        | N/A           | N/A  | 13                    | 0,15          | 0,38 | N/A      | 0               |
| Choroid      | Choroid     | 21                       | 0,50          | 0,51 | 13                    | 0,54          | 0,52 | 0,835416 | 1               |
| ONH          | ONH         | 8                        | 2,38          | 0,52 | 0                     | N/A           | N/A  | N/A      | 2               |
| Sclera       | Sclera      | 21                       | 0,14          | 0,36 | 13                    | 0,08          | 0,28 | 0,575764 | 0               |

| <i>Dusp1</i> |             | pigmented n=6 (ONH: n=2) |               |      | albino n=4 (ONH: n=0) |               |      | p-value  | average rounded |
|--------------|-------------|--------------------------|---------------|------|-----------------------|---------------|------|----------|-----------------|
|              |             | slides                   | average score | (SD) | slides                | average score | (SD) |          |                 |
| Cornea       | Epithelium  | 22                       | 2,73          | 0,55 | 16                    | 2,75          | 0,58 | 0,902699 | 3               |
|              | Stroma      | 22                       | 1,32          | 0,72 | 16                    | 1,44          | 0,63 | 0,597293 | 1               |
|              | Endothelium | 20                       | 1,95          | 0,83 | 15                    | 1,73          | 0,80 | 0,44155  | 2               |
| TM           | TM          | 17                       | 2,12          | 0,70 | 14                    | 1,79          | 0,43 | 0,13037  | 2               |
| Ciliary body | PE          | 0                        | N/A           | N/A  | 15                    | 2,07          | 0,70 | N/A      | 2               |
|              | NPE         | 21                       | 1,71          | 0,96 | 15                    | 2,20          | 0,68 | 0,10092  | 2               |
| Iris         | Iris        | 0                        | N/A           | N/A  | 14                    | 2,00          | 0,55 | N/A      | 2               |
| Lens         | Lens        | 21                       | 2,90          | 0,30 | 15                    | 2,80          | 0,56 | 0,473332 | 3               |
| Retina       | GCL         | 22                       | 2,41          | 0,73 | 15                    | 2,67          | 0,49 | 0,242474 | 3               |
|              | INL         | 21                       | 2,48          | 0,81 | 15                    | 2,60          | 0,83 | 0,657813 | 3               |
|              | ONL         | 22                       | 1,64          | 0,85 | 15                    | 1,67          | 0,49 | 0,901449 | 2               |
|              | segment     | 22                       | 1,64          | 0,79 | 15                    | 1,60          | 0,63 | 0,882716 | 2               |
|              | RPE         | 0                        | N/A           | N/A  | 13                    | 2,69          | 0,63 | N/A      | 3               |
| Choroid      | Choroid     | 16                       | 2,44          | 0,73 | 14                    | 2,62          | 0,65 | 0,498448 | 3               |
| ONH          | ONH         | 8                        | 2,88          | 0,35 | 0                     | N/A           | N/A  | N/A      | 3               |
| Sclera       | Sclera      | 16                       | 2,40          | 0,74 | 14                    | 2,43          | 0,65 | 0,912687 | 2               |

Supplemental table 1: Continued

| <i>Optn</i>  |             | pigmented n=6 (ONH: n=2) |               |      | albino n=4 (ONH: n=0) |               |      | p-value  | average rounded |
|--------------|-------------|--------------------------|---------------|------|-----------------------|---------------|------|----------|-----------------|
|              |             | slides                   | average score | (SD) | slides                | average score | (SD) |          |                 |
| Cornea       | Epithelium  | 24                       | 1,63          | 0,48 | 21                    | 1,38          | 0,58 | 0,138317 | 2               |
|              | Stroma      | 24                       | 0,25          | 0,43 | 21                    | 0,13          | 0,33 | 0,276952 | 0               |
|              | Endothelium | 24                       | 0,13          | 0,33 | 21                    | 0,13          | 0,33 | 1        | 0               |
| TM           | TM          | 15                       | 1,20          | 0,54 | 13                    | 1,00          | 0,39 | 0,297195 | 1               |
| Ciliary body | PE          | 0                        | N/A           | N/A  | 24                    | 2,63          | 0,48 | N/A      | 3               |
|              | NPE         | 24                       | 2,63          | 0,48 | 24                    | 2,79          | 0,41 | 0,212274 | 3               |
| Iris         | Iris        | 0                        | N/A           | N/A  | 24                    | 2,92          | 0,28 | N/A      | 3               |
| Lens         | Lens        | 21                       | 2,86          | 0,35 | 20                    | 2,80          | 0,40 | 0,637134 | 3               |
| Retina       | GCL         | 24                       | 3,00          | 0,00 | 24                    | 3,00          | 0,00 | 1,00     | 3               |
|              | INL         | 24                       | 3,00          | 0,00 | 24                    | 3,00          | 0,00 | 1,00     | 3               |
|              | ONL         | 24                       | 3,00          | 0,00 | 24                    | 3,00          | 0,00 | 1,00     | 3               |
|              | segment     | 24                       | 3,00          | 0,00 | 24                    | 3,00          | 0,00 | 1,00     | 3               |
|              | RPE         | 0                        | N/A           | N/A  | 16                    | 3,00          | 0,00 | N/A      | 3               |
| Choroid      | Choroid     | 19                       | 1,79          | 0,52 | 16                    | 1,88          | 0,60 | 0,66394  | 2               |
| ONH          | ONH         | 8                        | 1,38          | 0,48 | 0                     | N/A           | N/A  | N/A      | 1               |
| Sclera       | Sclera      | 19                       | 1,47          | 0,50 | 16                    | 1,63          | 0,48 | 0,38556  | 2               |
