# Supplementary material
Source: publisher figshare collection journal article supplement (https://tandf.figshare.com/articles/dataset/_/8068571)
Supplement: Supplementary file 4 [file 2]

Archive with 4 entries (4 files):
- Supplemental figure 1_Caption.pdf
- Supplementary Table 1.pdf
- Supplementary Tables.pdf
- ncer-2018-or-0472-File014.tif
