# Supplementary material
Source: publisher figshare collection journal article supplement (https://tandf.figshare.com/articles/dataset/_/8068571)

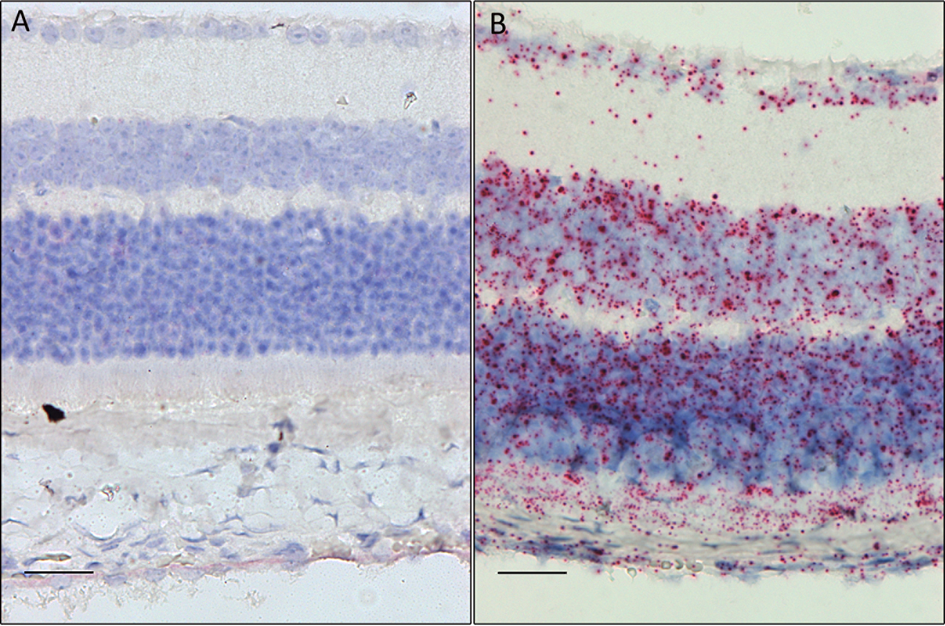

Supplement: Supplementary file 4 [file 2 › ncer-2018-or-0472-File014.tif]
